# Supplementary material for: Corrigendum to “Efficacy and Tolerability of Intravenous Ferric Carboxymaltose in Patients with Iron Deficiency at a Hospital Outpatient Clinic: A Retrospective Cohort Study of Real-World Clinical Practice”
Source: Anemia. 2019 Jan 1;2019:9242607. doi: 10.1155/2019/9242607 (PMC6332971; doi:10.1155/2019/9242607)
Supplement: Supplementary Materials — The underlying patient-level data and a script with all the logistic regression models adjusted to generate the Odds Ratio and respective confidence intervals for Table 3 are included as Supplementary Materials. [file 9242607.f1.zip]

Archive with 3 entries (2 files):
- 9242607.f1/
- 9242607.f1/Database_Retrospective Study FCM.xlsx
- 9242607.f1/Script for Statistical Analysis-1.txt
