# Supplementary material for: Corrigendum to “Efficacy and Tolerability of Intravenous Ferric Carboxymaltose in Patients with Iron Deficiency at a Hospital Outpatient Clinic: A Retrospective Cohort Study of Real-World Clinical Practice”
Source: Anemia. 2019 Jan 1;2019:9242607. doi: 10.1155/2019/9242607 (PMC6332971; doi:10.1155/2019/9242607)
Supplement: Supplementary Materials — The underlying patient-level data and a script with all the logistic regression models adjusted to generate the Odds Ratio and respective confidence intervals for Table 3 are included as Supplementary Materials. [file 9242607.f1.zip › 9242607.f1/Database_Retrospective Study FCM.xlsx]

## Sheet: Database
ID	sex	age	diag1unif	ICD10	hb1	ht1	vgm1	hgm1	fer1	tstat1	adverse	hb2	ht2	vgm2	hgm2	fer2	tstat2	hbdif	htdif	vgmdif	hgmdif	ferdif	tsatdif	hbdifpct	htdifpct	vgmdifpct	hgmdifpct	ferdifpct	tsatdifpct	Anemia1	Anemia2	Anemia1num	IronDef1	IronDef2	AnemiaIron	AnemiaIron_dico	Endpoint2g	Endpoint2gnum	Endpoint3g	Endpoint3gnum	Endpointtsat	Endpointtsatnum	Genitouri	Neoplasm	Digestive	Circulatory	Others	ICD10Final	DoseGroup
1	F	68	Hemorragia digestiva baixa	XI Diseases of the digestive system	11.7	36.1	89	28.8	14.8	8	#N/A	12.6	38.9	91.8	29.8	314	9	0.9	2.8	2.8	1	299.2	1	7.69231	7.75623	3.14607	3.47222	2021.62	12.5	Yes	No	1	Yes	Yes	Iron Deficiency Anemia	Iron Deficiency Anemia	Failure	1	Failure	1	Failure	1	0	0	1	0	0	XI Diseases of the digestive system	500-1000mg
2	F	68	Hemorragia digestiva baixa	XI Diseases of the digestive system	6.8	23.7	87.2	25	10.8	4	#N/A	11.5	35.8	92.2	29.6	21.1	9	4.7	12.1	5	4.6	10.3	5	69.1176	51.0549	5.73394	18.4	95.3704	125	Yes	Yes	1	Yes	Yes	Iron Deficiency Anemia	Iron Deficiency Anemia	Success	0	Success	0	Failure	1	0	0	1	0	0	XI Diseases of the digestive system	500-1000mg
3	F	60	Gastrite/Ulcera	XI Diseases of the digestive system	12.7	37.3	83.1	27	7.8	13	Diarreia no dia seguinte	13.6	42	86.6	28	51.1	23	0.9	4.7	3.5	1	43.3	10	7.08661	12.6005	4.21179	3.7037	555.128	76.9231	No	No	0	Yes	No	Iron Deficiency without Anemia	Non-Iron Deficiency Anemia	Failure	1	Failure	1	Success	0	0	0	1	0	0	XI Diseases of the digestive system	500mg
4	F	38	Cirurgia bariatrica	XI Diseases of the digestive system	9.1	29.4	93.6	28.9	7.6	5	#N/A	12.1	38.1	96.1	30.6	146.2	20	3	8.7	2.5	1.7	138.6	15	32.967	29.5918	2.67094	5.88235	1823.68	300	Yes	No	1	Yes	No	Iron Deficiency Anemia	Iron Deficiency Anemia	Success	0	Failure	1	Failure	1	0	0	1	0	0	XI Diseases of the digestive system	500-1000mg
5	M	73	Hemorragia digestiva baixa	XI Diseases of the digestive system	10.5	34.3	79	24.2	11.3	6	#N/A	15.2	46.1	87.1	28.7	82.9	12	4.7	11.8	8.1	4.5	71.6	6	44.7619	34.4023	10.2532	18.595	633.628	100	Yes	No	1	Yes	Yes	Iron Deficiency Anemia	Iron Deficiency Anemia	Success	0	Success	0	Failure	1	0	0	1	0	0	XI Diseases of the digestive system	500-1000mg
6	F	47	Metrorragias	XIV Diseases of the genitourinary system	12	37.1	82.1	26.7	7	11	#N/A	13.3	41.2	84.5	27.4	8.7	20	1.3	4.1	2.4	0.7	1.7	9	10.8333	11.0512	2.92326	2.62172	24.2857	81.8182	Yes	No	1	Yes	No	Iron Deficiency Anemia	Iron Deficiency Anemia	Failure	1	Failure	1	Failure	1	1	0	0	0	0	XIV Diseases of the genitourinary system	500mg
7	F	31	Metrorragias	XIV Diseases of the genitourinary system	11.4	34.4	73.5	24.4	4.6	10.4	#N/A	13.7	41.5	79.9	26.5	31.2	14	2.3	7.1	6.4	2.1	26.6	3.6	20.1754	20.6395	8.70748	8.60656	578.261	34.6154	Yes	No	1	Yes	Yes	Iron Deficiency Anemia	Iron Deficiency Anemia	Success	0	Failure	1	Failure	1	1	0	0	0	0	XIV Diseases of the genitourinary system	500mg
8	F	44	SPI	VI Diseases of the nervous system	11.7	37.6	79.1	24.6	8.8	7	#N/A	13.7	41.7	84.9	28	85.5	18	2	4.1	5.8	3.4	76.7	11	17.094	10.9043	7.33249	13.8211	871.591	157.143	Yes	No	1	Yes	Yes	Iron Deficiency Anemia	Iron Deficiency Anemia	Failure	1	Failure	1	Failure	1	0	0	0	0	1	Others	500-1000mg
9	F	43	Metrorragias	XIV Diseases of the genitourinary system	9.6	29.2	85.6	28.2	3.2	8	#N/A	11.5	34.5	91.5	30.6	57.3	19	1.9	5.3	5.9	2.4	54.1	11	19.7917	18.1507	6.89252	8.51064	1690.62	137.5	Yes	Yes	1	Yes	Yes	Iron Deficiency Anemia	Iron Deficiency Anemia	Failure	1	Failure	1	Failure	1	1	0	0	0	0	XIV Diseases of the genitourinary system	500-1000mg
10	M	82	Hemorragia digestiva baixa	XI Diseases of the digestive system	9.3	29.9	87.1	27.1	6.2	5	#N/A	14.3	43.4	90.5	29.9	58.6	39	5	13.5	3.4	2.8	52.4	34	53.7634	45.1505	3.90356	10.3321	845.161	680	Yes	No	1	Yes	No	Iron Deficiency Anemia	Iron Deficiency Anemia	Success	0	Success	0	Success	0	0	0	1	0	0	XI Diseases of the digestive system	500-1000mg
11	F	75	RWO	VII Diseases of the eye and adnexa	10.4	33.7	79.7	24.6	4.5	8	#N/A	14.5	44.4	88	28.8	65.7	22	4.1	10.7	8.3	4.2	61.2	14	39.4231	31.7507	10.4141	17.0732	1360	175	Yes	No	1	Yes	No	Iron Deficiency Anemia	Iron Deficiency Anemia	Success	0	Success	0	Success	0	0	0	0	0	1	Others	500-1000mg
12	F	53	Metrorragias	XIV Diseases of the genitourinary system	8.2	27	66.2	20.1	3	4	#N/A	13.5	42.9	86.1	27	14.5	12	5.3	15.9	19.9	6.9	11.5	8	64.6341	58.8889	30.0604	34.3284	383.333	200	Yes	No	1	Yes	Yes	Iron Deficiency Anemia	Iron Deficiency Anemia	Success	0	Success	0	Failure	1	1	0	0	0	0	XIV Diseases of the genitourinary system	500-1000mg
13	M	76	Hemorragia digestiva baixa	XI Diseases of the digestive system	10.2	32.9	76.8	23.7	4.3	5	#N/A	11.7	35	81.8	27.3	41.8	34	1.5	2.1	5	3.6	37.5	29	14.7059	6.38298	6.51042	15.1899	872.093	580	Yes	Yes	1	Yes	No	Iron Deficiency Anemia	Iron Deficiency Anemia	Failure	1	Failure	1	Success	0	0	0	1	0	0	XI Diseases of the digestive system	500-1000mg
14	F	44	Cirurgia bariatrica	XI Diseases of the digestive system	9.5	29.8	75.2	23.9	2.9	13	#N/A	13.2	39.7	85.6	28.6	39.6	20	3.7	9.9	10.4	4.7	36.7	7	38.9474	33.2215	13.8298	19.6653	1265.52	53.8462	Yes	No	1	Yes	No	Iron Deficiency Anemia	Iron Deficiency Anemia	Success	0	Success	0	Failure	1	0	0	1	0	0	XI Diseases of the digestive system	500-1000mg
15	F	84	Hemorragia digestiva baixa	XI Diseases of the digestive system	10	30.9	83.6	27.2	9.1	14	#N/A	10.7	34.2	87.7	27.5	49.4	18	0.7	3.3	4.1	0.3	40.3	4	7	10.6796	4.90431	1.10294	442.857	28.5714	Yes	Yes	1	Yes	Yes	Iron Deficiency Anemia	Iron Deficiency Anemia	Failure	1	Failure	1	Failure	1	0	0	1	0	0	XI Diseases of the digestive system	500mg
16	F	54	Metrorragias	XIV Diseases of the genitourinary system	11.8	36.4	76.4	24.7	6.9	6	#N/A	14.9	45.1	82.5	27.3	211.4	42	3.1	8.7	6.1	2.6	204.5	36	26.2712	23.9011	7.98429	10.5263	2963.77	600	Yes	No	1	Yes	No	Iron Deficiency Anemia	Iron Deficiency Anemia	Success	0	Success	0	Success	0	1	0	0	0	0	XIV Diseases of the genitourinary system	500-1000mg
17	F	43	Metrorragias	XIV Diseases of the genitourinary system	10.2	30.2	69.5	23.6	2.3	4	Arrepios	12.6	38.4	82.5	27	53.1	15	2.4	8.2	13	3.4	50.8	11	23.5294	27.1523	18.705	14.4068	2208.7	275	Yes	No	1	Yes	Yes	Iron Deficiency Anemia	Iron Deficiency Anemia	Success	0	Failure	1	Failure	1	1	0	0	0	0	XIV Diseases of the genitourinary system	500-1000mg
18	F	74	HTP	IX Diseases of the circulatory system	7.8	28.1	64.8	18.1	1	2	#N/A	13.6	44.5	81.2	24.9	154.2	16	5.8	16.4	16.4	6.8	153.2	14	74.359	58.363	25.3086	37.5691	15320	700	Yes	No	1	Yes	Yes	Iron Deficiency Anemia	Iron Deficiency Anemia	Success	0	Success	0	Failure	1	0	0	0	1	0	IX Diseases of the circulatory system	500-1000mg
19	F	38	Metrorragias	XIV Diseases of the genitourinary system	10	32.5	84.1	25.8	4	6	#N/A	12.8	39.4	91.2	29.6	67.8	23	2.8	6.9	7.1	3.8	63.8	17	28	21.2308	8.44233	14.7287	1595	283.333	Yes	No	1	Yes	No	Iron Deficiency Anemia	Iron Deficiency Anemia	Success	0	Failure	1	Success	0	1	0	0	0	0	XIV Diseases of the genitourinary system	500-1000mg
20	F	44	Metrorragias	XIV Diseases of the genitourinary system	13.8	42.2	86.3	28.2	5.7	8	#N/A	15.1	44.9	86.4	29	22.2	25	1.3	2.7	0.1	0.8	16.5	17	9.42029	6.3981	0.115875	2.83688	289.474	212.5	No	No	0	Yes	No	Iron Deficiency without Anemia	Non-Iron Deficiency Anemia	Failure	1	Failure	1	Success	0	1	0	0	0	0	XIV Diseases of the genitourinary system	500mg
21	F	35	Metrorragias	XIV Diseases of the genitourinary system	8	27.6	82.3	23.9	0.9	2	#N/A	11.9	37.5	87.6	27.7	36.8	9	3.9	9.9	5.3	3.8	35.9	7	48.75	35.8696	6.43985	15.8996	3988.89	350	Yes	Yes	1	Yes	Yes	Iron Deficiency Anemia	Iron Deficiency Anemia	Success	0	Success	0	Failure	1	1	0	0	0	0	XIV Diseases of the genitourinary system	500-1000mg
22	F	70	SPI	VI Diseases of the nervous system	13.7	42.1	87.3	28.4	6.4	11	#N/A	14.6	44.3	92.2	30.3	173	27	0.9	2.2	4.9	1.9	166.6	16	6.56934	5.22565	5.61283	6.69014	2603.12	145.455	No	No	0	Yes	No	Iron Deficiency without Anemia	Non-Iron Deficiency Anemia	Failure	1	Failure	1	Success	0	0	0	0	0	1	Others	500mg
23	F	44	Metrorragias	XIV Diseases of the genitourinary system	11.6	34.1	81.4	27.8	6	6	#N/A	13.4	38.9	83.1	28.7	35.8	22	1.8	4.8	1.7	0.9	29.8	16	15.5172	14.0762	2.08845	3.23741	496.667	266.667	Yes	No	1	Yes	No	Iron Deficiency Anemia	Iron Deficiency Anemia	Failure	1	Failure	1	Success	0	1	0	0	0	0	XIV Diseases of the genitourinary system	500-1000mg
24	M	79	Angiodisplasia	XI Diseases of the digestive system	11.6	36.3	93.4	29.9	34	12	#N/A	12.5	37.2	93.3	31.4	129.4	22	0.9	0.9	-0.1	1.5	95.4	10	7.75862	2.47934	-0.107066	5.01672	280.588	83.3333	Yes	Yes	1	Yes	No	Iron Deficiency Anemia	Iron Deficiency Anemia	Failure	1	Failure	1	Success	0	0	0	1	0	0	XI Diseases of the digestive system	500mg
25	F	70	Angiodisplasia	XI Diseases of the digestive system	11.5	35.9	84.7	27.1	47.6	9	#N/A	12.2	37	83.9	27.7	207.4	26	0.7	1.1	-0.8	0.6	159.8	17	6.08696	3.06407	-0.94451	2.21402	335.714	188.889	Yes	No	1	Yes	No	Iron Deficiency Anemia	Iron Deficiency Anemia	Failure	1	Failure	1	Success	0	0	0	1	0	0	XI Diseases of the digestive system	500mg
26	F	50	Metrorragias	XIV Diseases of the genitourinary system	12.1	38.6	82.2	25.7	8	5	#N/A	13.2	41.6	86	27.3	25.5	18	1.1	3	3.8	1.6	17.5	13	9.09091	7.77202	4.62287	6.22568	218.75	260	No	No	0	Yes	Yes	Iron Deficiency without Anemia	Non-Iron Deficiency Anemia	Failure	1	Failure	1	Failure	1	1	0	0	0	0	XIV Diseases of the genitourinary system	500mg
27	F	45	Cirurgia bariatrica	XI Diseases of the digestive system	10.2	30.3	79	26.8	8.9	3	NÃ¡usea	11.1	35	85.8	27.2	16.7	12	0.9	4.7	6.8	0.4	7.8	9	8.82353	15.5116	8.60759	1.49254	87.6404	300	Yes	Yes	1	Yes	Yes	Iron Deficiency Anemia	Iron Deficiency Anemia	Failure	1	Failure	1	Failure	1	0	0	1	0	0	XI Diseases of the digestive system	500mg
28	F	34	Metrorragias	XIV Diseases of the genitourinary system	8.7	31.1	65	18.1	3.5	3	#N/A	13	39.8	89.2	29.1	73	19	4.3	8.7	24.2	11	69.5	16	49.4253	27.9743	37.2308	60.7735	1985.71	533.333	Yes	No	1	Yes	Yes	Iron Deficiency Anemia	Iron Deficiency Anemia	Success	0	Success	0	Failure	1	1	0	0	0	0	XIV Diseases of the genitourinary system	500-1000mg
29	F	51	Cirurgia bariatrica	XI Diseases of the digestive system	10.6	33.6	92.9	29.1	13.2	7	#N/A	12.2	37.6	97.9	31.8	112.5	30	1.6	4	5	2.7	99.3	23	15.0943	11.9048	5.38213	9.27835	752.273	328.571	Yes	No	1	Yes	No	Iron Deficiency Anemia	Iron Deficiency Anemia	Failure	1	Failure	1	Success	0	0	0	1	0	0	XI Diseases of the digestive system	500-1000mg
30	F	39	Cirurgia bariatrica	XI Diseases of the digestive system	10.5	34.3	77	23.7	23.1	12	#N/A	12.7	38.6	82.6	27.1	19.6	14	2.2	4.3	5.6	3.4	-3.5	2	20.9524	12.5364	7.27273	14.346	-15.1515	16.6667	Yes	No	1	Yes	Yes	Iron Deficiency Anemia	Iron Deficiency Anemia	Success	0	Failure	1	Failure	1	0	0	1	0	0	XI Diseases of the digestive system	500mg
31	F	41	Metrorragias	XIV Diseases of the genitourinary system	11.9	35.2	81.4	27.6	5.2	13	#N/A	13.8	41.9	88.2	29	34.4	28	1.9	6.7	6.8	1.4	29.2	15	15.9664	19.0341	8.35381	5.07246	561.538	115.385	Yes	No	1	Yes	No	Iron Deficiency Anemia	Iron Deficiency Anemia	Failure	1	Failure	1	Success	0	1	0	0	0	0	XIV Diseases of the genitourinary system	500mg
32	F	47	Sarcoidose	X Diseases of the respiratory system	10.5	32	89.9	29.4	8.3	22	#N/A	12.2	37.9	94.5	30.5	31.5	34	1.7	5.9	4.6	1.1	23.2	12	16.1905	18.4375	5.1168	3.7415	279.518	54.5455	Yes	No	1	No	No	No Iron Deficiency	Non-Iron Deficiency Anemia	Failure	1	Failure	1	Success	0	0	0	0	0	1	Others	500mg
33	F	40	Cirurgia bariatrica	XI Diseases of the digestive system	11.8	36.6	78.1	25.1	4.8	6	#N/A	12.5	37.8	86.8	28.8	26.5	32	0.7	1.2	8.7	3.7	21.7	26	5.9322	3.27869	11.1396	14.741	452.083	433.333	Yes	No	1	Yes	No	Iron Deficiency Anemia	Iron Deficiency Anemia	Failure	1	Failure	1	Success	0	0	0	1	0	0	XI Diseases of the digestive system	500-1000mg
34	M	79	Gastrite/Ulcera	XI Diseases of the digestive system	11.5	36.3	77.8	24.7	12.4	7	#N/A	13.8	41.3	83.3	27.9	42.1	18	2.3	5	5.5	3.2	29.7	11	20	13.7741	7.06941	12.9555	239.516	157.143	Yes	No	1	Yes	Yes	Iron Deficiency Anemia	Iron Deficiency Anemia	Success	0	Failure	1	Failure	1	0	0	1	0	0	XI Diseases of the digestive system	500mg
35	M	69	Hemorragia digestiva baixa	XI Diseases of the digestive system	9.8	30.4	96.4	31.2	63.8	11	#N/A	10.2	31.2	96.4	31.5	137.2	22	0.4	0.8	0	0.3	73.4	11	4.08163	2.63158	0	0.961538	115.047	100	Yes	Yes	1	Yes	No	Iron Deficiency Anemia	Iron Deficiency Anemia	Failure	1	Failure	1	Success	0	0	0	1	0	0	XI Diseases of the digestive system	500mg
36	F	49	Metrorragias	XIV Diseases of the genitourinary system	11.3	34.3	79.7	26.2	4.1	8	#N/A	12.3	37.8	89.6	29.1	44.1	16	1	3.5	9.9	2.9	40	8	8.84956	10.2041	12.4216	11.0687	975.61	100	Yes	No	1	Yes	Yes	Iron Deficiency Anemia	Iron Deficiency Anemia	Failure	1	Failure	1	Failure	1	1	0	0	0	0	XIV Diseases of the genitourinary system	500mg
37	F	56	Cirurgia bariatrica	XI Diseases of the digestive system	14.1	43.9	84.9	27.3	5.7	8	Urticaria , sibilos	15	45.6	88.4	29.1	23.9	18	0.9	1.7	3.5	1.8	18.2	10	6.38298	3.87244	4.1225	6.59341	319.298	125	No	No	0	Yes	Yes	Iron Deficiency without Anemia	Non-Iron Deficiency Anemia	Failure	1	Failure	1	Failure	1	0	0	1	0	0	XI Diseases of the digestive system	500mg
38	F	24	Metrorragias	XIV Diseases of the genitourinary system	8.5	30	62.4	17.7	3.8	3	#N/A	12.1	37.7	79.7	25.6	31.5	15	3.6	7.7	17.3	7.9	27.7	12	42.3529	25.6667	27.7244	44.6328	728.947	400	Yes	No	1	Yes	Yes	Iron Deficiency Anemia	Iron Deficiency Anemia	Success	0	Success	0	Failure	1	1	0	0	0	0	XIV Diseases of the genitourinary system	500-1000mg
39	F	51	Metrorragias	XIV Diseases of the genitourinary system	10.2	34.3	88.9	26.4	6.1	9	#N/A	13.9	43.2	94.7	30.4	149	37	3.7	8.9	5.8	4	142.9	28	36.2745	25.9475	6.52418	15.1515	2342.62	311.111	Yes	No	1	Yes	No	Iron Deficiency Anemia	Iron Deficiency Anemia	Success	0	Success	0	Success	0	1	0	0	0	0	XIV Diseases of the genitourinary system	500-1000mg
40	F	81	Insuf card	IX Diseases of the circulatory system	8.1	26.7	79.5	24	12.3	10	#N/A	9.3	28.7	88.9	28.8	199.9	20	1.2	2	9.4	4.8	187.6	10	14.8148	7.49064	11.8239	20	1525.2	100	Yes	Yes	1	Yes	No	Iron Deficiency Anemia	Iron Deficiency Anemia	Failure	1	Failure	1	Failure	1	0	0	0	1	0	IX Diseases of the circulatory system	500-1000mg
41	F	53	RWO	VII Diseases of the eye and adnexa	10.3	32.5	77.4	24.5	50.7	5	#N/A	13.6	42.1	81.9	26.4	29.6	14	3.3	9.6	4.5	1.9	-21.1	9	32.0388	29.5385	5.81395	7.7551	-41.6174	180	Yes	No	1	Yes	Yes	Iron Deficiency Anemia	Iron Deficiency Anemia	Success	0	Success	0	Failure	1	0	0	0	0	1	Others	500-1000mg
42	F	52	Metrorragias	XIV Diseases of the genitourinary system	12.7	39.1	85.6	27.9	4.8	9	#N/A	13.5	40.3	89.4	30	24.1	33	0.8	1.2	3.8	2.1	19.3	24	6.29921	3.06905	4.43925	7.52688	402.083	266.667	No	No	0	Yes	No	Iron Deficiency without Anemia	Non-Iron Deficiency Anemia	Failure	1	Failure	1	Success	0	1	0	0	0	0	XIV Diseases of the genitourinary system	500mg
43	F	59	Gastrite/Ulcera	XI Diseases of the digestive system	10.6	34.5	82.2	25.3	18.6	13	#N/A	12.8	37.3	79.8	27.3	118.3	17	2.2	2.8	-2.4	2	99.7	4	20.7547	8.11594	-2.91971	7.90514	536.022	30.7692	Yes	No	1	Yes	Yes	Iron Deficiency Anemia	Iron Deficiency Anemia	Success	0	Failure	1	Failure	1	0	0	1	0	0	XI Diseases of the digestive system	500-1000mg
44	F	88	Neo pulmÃ£o	II Neoplasms	8.7	28.8	71	21.5	6.2	4	NÃ¡usea; hipertermia	13.2	39	86.9	29.5	40.5	18	4.5	10.2	15.9	8	34.3	14	51.7241	35.4167	22.3944	37.2093	553.226	350	Yes	No	1	Yes	Yes	Iron Deficiency Anemia	Iron Deficiency Anemia	Success	0	Success	0	Failure	1	0	1	0	0	0	II Neoplasms	500-1000mg
45	M	68	Gastrite/Ulcera	XI Diseases of the digestive system	13.4	41.3	86.7	28.1	13.6	6	#N/A	15	47.1	90.3	28.7	28.7	21	1.6	5.8	3.6	0.6	15.1	15	11.9403	14.0436	4.15225	2.13523	111.029	250	No	No	0	Yes	No	Iron Deficiency without Anemia	Non-Iron Deficiency Anemia	Failure	1	Failure	1	Success	0	0	0	1	0	0	XI Diseases of the digestive system	500mg
46	M	66	DHC	XI Diseases of the digestive system	9.1	29.1	86.9	27.1	9.6	11	#N/A	10.7	32.9	89	29.1	49.3	19	1.6	3.8	2.1	2	39.7	8	17.5824	13.0584	2.41657	7.38007	413.542	72.7273	Yes	Yes	1	Yes	Yes	Iron Deficiency Anemia	Iron Deficiency Anemia	Failure	1	Failure	1	Failure	1	0	0	1	0	0	XI Diseases of the digestive system	500mg
47	M	64	DHC	XI Diseases of the digestive system	8	26.9	75.5	22.4	6.3	12.4	#N/A	11.6	36.6	85.5	27.1	122.6	24	3.6	9.7	10	4.7	116.3	11.6	45	36.0595	13.245	20.9821	1846.03	93.5484	Yes	Yes	1	Yes	No	Iron Deficiency Anemia	Iron Deficiency Anemia	Success	0	Success	0	Success	0	0	0	1	0	0	XI Diseases of the digestive system	500-1000mg
48	F	67	Metrorragias	XIV Diseases of the genitourinary system	7.6	23.7	79.8	25.6	6	4	#N/A	11.8	35.6	84.1	27.9	48.2	12	4.2	11.9	4.3	2.3	42.2	8	55.2632	50.211	5.38847	8.98437	703.333	200	Yes	Yes	1	Yes	Yes	Iron Deficiency Anemia	Iron Deficiency Anemia	Success	0	Success	0	Failure	1	1	0	0	0	0	XIV Diseases of the genitourinary system	500-1000mg
49	F	42	Metrorragias	XIV Diseases of the genitourinary system	11.9	35.2	81.4	27.6	5.2	13	#N/A	13.8	41.9	88.2	29	34.4	28	1.9	6.7	6.8	1.4	29.2	15	15.9664	19.0341	8.35381	5.07246	561.538	115.385	Yes	No	1	Yes	No	Iron Deficiency Anemia	Iron Deficiency Anemia	Failure	1	Failure	1	Success	0	1	0	0	0	0	XIV Diseases of the genitourinary system	500mg
50	F	50	Metrorragias	XIV Diseases of the genitourinary system	13.1	39.7	80.1	26.4	5.4	8	#N/A	14.2	44.3	87.8	28.2	22.3	16	1.1	4.6	7.7	1.8	16.9	8	8.39695	11.5869	9.61298	6.81818	312.963	100	No	No	0	Yes	Yes	Iron Deficiency without Anemia	Non-Iron Deficiency Anemia	Failure	1	Failure	1	Failure	1	1	0	0	0	0	XIV Diseases of the genitourinary system	500mg
51	F	82	Insuf card	IX Diseases of the circulatory system	11.3	36.5	80.6	24.8	5	10	#N/A	12.1	37	88	28.9	18	11	0.8	0.5	7.4	4.1	13	1	7.07965	1.36986	9.18114	16.5323	260	10	Yes	No	1	Yes	Yes	Iron Deficiency Anemia	Iron Deficiency Anemia	Failure	1	Failure	1	Failure	1	0	0	0	1	0	IX Diseases of the circulatory system	500-1000mg
52	F	50	Metrorragias	XIV Diseases of the genitourinary system	8.2	27.2	79.4	23.8	16.3	6	#N/A	10.7	34.5	86.2	26.6	76.7	15	2.5	7.3	6.8	2.8	60.4	9	30.4878	26.8382	8.56423	11.7647	370.552	150	Yes	Yes	1	Yes	Yes	Iron Deficiency Anemia	Iron Deficiency Anemia	Success	0	Failure	1	Failure	1	1	0	0	0	0	XIV Diseases of the genitourinary system	500-1000mg
53	F	83	Insuf card	IX Diseases of the circulatory system	11	34.5	86.2	27.4	69	4	#N/A	12.7	39.1	86.5	28	200.5	18	1.7	4.6	0.3	0.6	131.5	14	15.4545	13.3333	0.348028	2.18978	190.58	350	Yes	No	1	Yes	Yes	Iron Deficiency Anemia	Iron Deficiency Anemia	Failure	1	Failure	1	Failure	1	0	0	0	1	0	IX Diseases of the circulatory system	500mg
54	F	43	Metrorragias	XIV Diseases of the genitourinary system	9.9	32.2	83.9	25.8	8	6.5	#N/A	13.2	39	89.9	30.4	15.6	22	3.3	6.8	6	4.6	7.6	15.5	33.3333	21.118	7.15137	17.8295	95	238.462	Yes	No	1	Yes	No	Iron Deficiency Anemia	Iron Deficiency Anemia	Success	0	Success	0	Success	0	1	0	0	0	0	XIV Diseases of the genitourinary system	500mg
55	M	35	Cirurgia bariatrica	XI Diseases of the digestive system	14	45.4	78	24	11.7	9	#N/A	14.8	43.3	74.5	25.5	72	29	0.8	-2.1	-3.5	1.5	60.3	20	5.71429	-4.62555	-4.48718	6.25	515.385	222.222	No	No	0	Yes	No	Iron Deficiency without Anemia	Non-Iron Deficiency Anemia	Failure	1	Failure	1	Success	0	0	0	1	0	0	XI Diseases of the digestive system	500mg
56	F	40	Metrorragias	XIV Diseases of the genitourinary system	8	27.5	67.4	19.6	5.7	11	#N/A	12.1	38.5	89.2	28.1	175.6	19.3	4.1	11	21.8	8.5	169.9	8.3	51.25	40	32.3442	43.3673	2980.7	75.4545	Yes	No	1	Yes	Yes	Iron Deficiency Anemia	Iron Deficiency Anemia	Success	0	Success	0	Failure	1	1	0	0	0	0	XIV Diseases of the genitourinary system	500-1000mg
57	M	67	HÃ©rnia do hiato	XI Diseases of the digestive system	9.1	31	79.9	23.5	6.8	4.2	#N/A	13.5	39.9	87.7	29.7	85.4	32	4.4	8.9	7.8	6.2	78.6	27.8	48.3516	28.7097	9.7622	26.383	1155.88	661.905	Yes	No	1	Yes	No	Iron Deficiency Anemia	Iron Deficiency Anemia	Success	0	Success	0	Success	0	0	0	1	0	0	XI Diseases of the digestive system	500-1000mg
58	M	58	DHC	XI Diseases of the digestive system	7.9	25.6	70.3	21.5	12.8	5	#N/A	11.4	35.3	77.4	24.9	159	13	3.5	9.7	7.1	3.4	146.2	8	44.3038	37.8906	10.0996	15.814	1142.19	160	Yes	Yes	1	Yes	Yes	Iron Deficiency Anemia	Iron Deficiency Anemia	Success	0	Success	0	Failure	1	0	0	1	0	0	XI Diseases of the digestive system	500-1000mg
59	F	27	Cirurgia bariatrica	XI Diseases of the digestive system	8.6	29.8	59.4	17.1	2	3	#N/A	12.8	38.8	71.7	23.5	27.7	21	4.2	9	12.3	6.4	25.7	18	48.8372	30.2013	20.7071	37.4269	1285	600	Yes	No	1	Yes	No	Iron Deficiency Anemia	Iron Deficiency Anemia	Success	0	Success	0	Success	0	0	0	1	0	0	XI Diseases of the digestive system	500-1000mg
60	M	67	HIV	I Certain infectious and parasitic diseases	9.2	28.3	70.6	23	3.7	5	#N/A	14.4	43.9	88.2	28.8	30.5	32	5.2	15.6	17.6	5.8	26.8	27	56.5217	55.1237	24.9292	25.2174	724.324	540	Yes	No	1	Yes	No	Iron Deficiency Anemia	Iron Deficiency Anemia	Success	0	Success	0	Success	0	0	0	0	0	1	Others	500-1000mg
61	F	44	Metrorragias	XIV Diseases of the genitourinary system	10.2	30.2	69.5	23.6	2.3	4	#N/A	12.6	38.4	81.5	27	53.1	15	2.4	8.2	12	3.4	50.8	11	23.5294	27.1523	17.2662	14.4068	2208.7	275	Yes	No	1	Yes	Yes	Iron Deficiency Anemia	Iron Deficiency Anemia	Success	0	Failure	1	Failure	1	1	0	0	0	0	XIV Diseases of the genitourinary system	500-1000mg
62	F	45	DII	XI Diseases of the digestive system	11.2	32.6	74.4	25.5	3.4	7	#N/A	12.9	38.1	92	31.2	77.7	57	1.7	5.5	17.6	5.7	74.3	50	15.1786	16.8712	23.6559	22.3529	2185.29	714.286	Yes	No	1	Yes	No	Iron Deficiency Anemia	Iron Deficiency Anemia	Failure	1	Failure	1	Success	0	0	0	1	0	0	XI Diseases of the digestive system	500-1000mg
63	F	22	Metrorragias	XIV Diseases of the genitourinary system	11.8	34.3	85.9	29.6	5.9	7	#N/A	12.6	37.9	86	28.7	23.1	25	0.8	3.6	0.1	-0.9	17.2	18	6.77966	10.4956	0.116414	-3.04054	291.525	257.143	Yes	No	1	Yes	No	Iron Deficiency Anemia	Iron Deficiency Anemia	Failure	1	Failure	1	Success	0	1	0	0	0	0	XIV Diseases of the genitourinary system	500-1000mg
64	F	48	Metrorragias	XIV Diseases of the genitourinary system	10.9	33.5	83.1	27.1	4.6	7	#N/A	12.9	39.7	89	28.9	113.9	37	2	6.2	5.9	1.8	109.3	30	18.3486	18.5075	7.09988	6.64207	2376.09	428.571	Yes	No	1	Yes	No	Iron Deficiency Anemia	Iron Deficiency Anemia	Failure	1	Failure	1	Success	0	1	0	0	0	0	XIV Diseases of the genitourinary system	500-1000mg
65	M	62	Hemorragia digestiva baixa	XI Diseases of the digestive system	7.6	19.5	81.8	32	9.3	7	#N/A	11.8	35.7	82.5	27.3	22.3	14	4.2	16.2	0.7	-4.7	13	7	55.2632	83.0769	0.855746	-14.6875	139.785	100	Yes	Yes	1	Yes	Yes	Iron Deficiency Anemia	Iron Deficiency Anemia	Success	0	Success	0	Failure	1	0	0	1	0	0	XI Diseases of the digestive system	500-1000mg
66	M	81	Hemorragia digestiva baixa	XI Diseases of the digestive system	7.7	25	73.1	22.5	10	6	#N/A	11.5	35.1	95.6	31.3	89	35	3.8	10.1	22.5	8.8	79	29	49.3506	40.4	30.7798	39.1111	790	483.333	Yes	Yes	1	Yes	No	Iron Deficiency Anemia	Iron Deficiency Anemia	Success	0	Success	0	Success	0	0	0	1	0	0	XI Diseases of the digestive system	500-1000mg
67	M	82	HÃ©rnia do hiato	XI Diseases of the digestive system	10	32	71.4	22.3	4.9	5	#N/A	13.7	42.2	82	26.6	13.9	11	3.7	10.2	10.6	4.3	9	6	37	31.875	14.8459	19.2825	183.673	120	Yes	No	1	Yes	Yes	Iron Deficiency Anemia	Iron Deficiency Anemia	Success	0	Success	0	Failure	1	0	0	1	0	0	XI Diseases of the digestive system	500-1000mg
68	F	54	Metrorragias	XIV Diseases of the genitourinary system	12.4	35.6	79.6	27.7	9	6	#N/A	15.7	43.5	82.4	29.8	109.6	30	3.3	7.9	2.8	2.1	100.6	24	26.6129	22.191	3.51759	7.58123	1117.78	400	No	No	0	Yes	No	Iron Deficiency without Anemia	Non-Iron Deficiency Anemia	Success	0	Success	0	Success	0	1	0	0	0	0	XIV Diseases of the genitourinary system	500mg
69	F	48	Metrorragias	XIV Diseases of the genitourinary system	11.3	34.3	79.7	26.2	4.1	8	#N/A	12.3	37.8	89.6	29.1	44.1	16	1	3.5	9.9	2.9	40	8	8.84956	10.2041	12.4216	11.0687	975.61	100	Yes	No	1	Yes	Yes	Iron Deficiency Anemia	Iron Deficiency Anemia	Failure	1	Failure	1	Failure	1	1	0	0	0	0	XIV Diseases of the genitourinary system	500-1000mg
70	F	32	Metrorragias	XIV Diseases of the genitourinary system	10.4	32.9	70	22	6.3	7.5	#N/A	12.9	39	83	27.4	155.1	23.4	2.5	6.1	13	5.4	148.8	15.9	24.0385	18.541	18.5714	24.5455	2361.9	212	Yes	No	1	Yes	No	Iron Deficiency Anemia	Iron Deficiency Anemia	Success	0	Failure	1	Success	0	1	0	0	0	0	XIV Diseases of the genitourinary system	500-1000mg
71	F	63	HÃ©rnia do hiato	XI Diseases of the digestive system	13.3	41.6	82	26	7.5	8	#N/A	15.1	45.6	87.7	29	59.6	37	1.8	4	5.7	3	52.1	29	13.5338	9.61538	6.95122	11.5385	694.667	362.5	No	No	0	Yes	No	Iron Deficiency without Anemia	Non-Iron Deficiency Anemia	Failure	1	Failure	1	Success	0	0	0	1	0	0	XI Diseases of the digestive system	500mg
72	F	27	Metrorragias	XIV Diseases of the genitourinary system	11.8	33.5	74.7	26.2	19.3	11	#N/A	12.3	36.3	78.1	26.6	158.6	25	0.5	2.8	3.4	0.4	139.3	14	4.23729	8.35821	4.55154	1.52672	721.762	127.273	Yes	No	1	Yes	No	Iron Deficiency Anemia	Iron Deficiency Anemia	Failure	1	Failure	1	Success	0	1	0	0	0	0	XIV Diseases of the genitourinary system	500mg
73	F	65	Artrite reumatÃ³ide	XIII Diseases of the musculoskeletal system and connective tissue	9.7	29.8	79.9	25.9	5	5	Artralgias	12.7	37.7	92.4	31	261.2	21	3	7.9	12.5	5.1	256.2	16	30.9278	26.5101	15.6446	19.6911	5124	320	Yes	No	1	Yes	No	Iron Deficiency Anemia	Iron Deficiency Anemia	Success	0	Failure	1	Success	0	0	0	0	0	1	Others	500-1000mg
74	F	70	HÃ©rnia do hiato	XI Diseases of the digestive system	8.4	28.3	80.2	23.7	4.6	4	#N/A	12.7	41.4	88.1	27.1	33.3	11.6	4.3	13.1	7.9	3.4	28.7	7.6	51.1905	46.2898	9.85037	14.346	623.913	190	Yes	No	1	Yes	Yes	Iron Deficiency Anemia	Iron Deficiency Anemia	Success	0	Success	0	Failure	1	0	0	1	0	0	XI Diseases of the digestive system	500-1000mg
75	F	68	Artrite reumatÃ³ide	XIII Diseases of the musculoskeletal system and connective tissue	10.9	34.6	76.8	24.2	34.4	8	#N/A	11.6	37	90.2	28.3	191.9	25	0.7	2.4	13.4	4.1	157.5	17	6.42202	6.93642	17.4479	16.9421	457.849	212.5	Yes	Yes	1	Yes	No	Iron Deficiency Anemia	Iron Deficiency Anemia	Failure	1	Failure	1	Success	0	0	0	0	0	1	Others	500mg
76	M	82	Hemorragia digestiva baixa	XI Diseases of the digestive system	8.4	25.5	88	28.9	21	9	#N/A	9.7	29.5	92	30.1	185	22	1.3	4	4	1.2	164	13	15.4762	15.6863	4.54545	4.15225	780.952	144.444	Yes	Yes	1	Yes	No	Iron Deficiency Anemia	Iron Deficiency Anemia	Failure	1	Failure	1	Success	0	0	0	1	0	0	XI Diseases of the digestive system	500-1000mg
77	M	70	Gastrite/Ulcera	XI Diseases of the digestive system	11.7	35.3	88.5	29.3	29	7	#N/A	13.5	40	88.3	29.8	30.2	13	1.8	4.7	-0.2	0.5	1.2	6	15.3846	13.3144	-0.225989	1.70648	4.13793	85.7143	Yes	No	1	Yes	Yes	Iron Deficiency Anemia	Iron Deficiency Anemia	Failure	1	Failure	1	Failure	1	0	0	1	0	0	XI Diseases of the digestive system	500mg
78	F	68	IRC	XIV Diseases of the genitourinary system	10.1	31.2	87.6	28.4	22.1	8	#N/A	12.4	38.6	94.8	30.4	159.4	21	2.3	7.4	7.2	2	137.3	13	22.7723	23.7179	8.21918	7.04225	621.267	162.5	Yes	No	1	Yes	No	Iron Deficiency Anemia	Iron Deficiency Anemia	Success	0	Failure	1	Success	0	1	0	0	0	0	XIV Diseases of the genitourinary system	500mg
79	F	24	Metrorragias	XIV Diseases of the genitourinary system	8.5	30	62.4	17.7	3.8	4	#N/A	11.6	38	71.6	21.9	227.5	31	3.1	8	9.2	4.2	223.7	27	36.4706	26.6667	14.7436	23.7288	5886.84	675	Yes	Yes	1	Yes	No	Iron Deficiency Anemia	Iron Deficiency Anemia	Success	0	Success	0	Success	0	1	0	0	0	0	XIV Diseases of the genitourinary system	500-1000mg
80	F	86	Insuf card	IX Diseases of the circulatory system	10.4	33.3	90.1	28.2	10.9	8	#N/A	11.9	37.4	93.4	29.8	61.9	25	1.5	4.1	3.3	1.6	51	17	14.4231	12.3123	3.6626	5.67376	467.89	212.5	Yes	Yes	1	Yes	No	Iron Deficiency Anemia	Iron Deficiency Anemia	Failure	1	Failure	1	Success	0	0	0	0	1	0	IX Diseases of the circulatory system	500mg
81	F	46	Cirurgia bariatrica	XI Diseases of the digestive system	8.8	29.7	71.6	21.2	2.6	3	#N/A	12.6	39.4	90.9	29.1	136.5	32	3.8	9.7	19.3	7.9	133.9	29	43.1818	32.6599	26.9553	37.2642	5150	966.667	Yes	No	1	Yes	No	Iron Deficiency Anemia	Iron Deficiency Anemia	Success	0	Success	0	Success	0	0	0	1	0	0	XI Diseases of the digestive system	500-1000mg
82	M	83	Angiodisplasia	XI Diseases of the digestive system	9.8	30.8	94.9	30.3	62.8	16	#N/A	10.3	32.9	96.7	30.2	184	25	0.5	2.1	1.8	-0.1	121.2	9	5.10204	6.81818	1.89673	-0.330033	192.994	56.25	Yes	Yes	1	Yes	No	Iron Deficiency Anemia	Iron Deficiency Anemia	Failure	1	Failure	1	Success	0	0	0	1	0	0	XI Diseases of the digestive system	500mg
83	F	42	Metrorragias	XIV Diseases of the genitourinary system	11.1	36.7	71	21.4	8.3	6.7	#N/A	14.4	43.8	85.2	28.1	70.2	23	3.3	7.1	14.2	6.7	61.9	16.3	29.7297	19.346	20	31.3084	745.783	243.284	Yes	No	1	Yes	No	Iron Deficiency Anemia	Iron Deficiency Anemia	Success	0	Success	0	Success	0	1	0	0	0	0	XIV Diseases of the genitourinary system	500-1000mg
84	F	37	Metrorragias	XIV Diseases of the genitourinary system	12.7	37.1	83.2	27.8	24	14.1	#N/A	13.6	40.5	87.9	29.4	29.5	30	0.9	3.4	4.7	1.6	5.5	15.9	7.08661	9.16442	5.64904	5.7554	22.9167	112.766	No	No	0	Yes	No	Iron Deficiency without Anemia	Non-Iron Deficiency Anemia	Failure	1	Failure	1	Success	0	1	0	0	0	0	XIV Diseases of the genitourinary system	500mg
85	M	70	DHC	XI Diseases of the digestive system	9.5	30.8	88	27.2	9.1	5	#N/A	10.7	33.4	88.9	28.6	42.6	8	1.2	2.6	0.9	1.4	33.5	3	12.6316	8.44156	1.02273	5.14706	368.132	60	Yes	Yes	1	Yes	Yes	Iron Deficiency Anemia	Iron Deficiency Anemia	Failure	1	Failure	1	Failure	1	0	0	1	0	0	XI Diseases of the digestive system	500mg
86	F	70	HÃ©rnia do hiato	XI Diseases of the digestive system	10.5	31.8	80	26.1	6.1	10	#N/A	12.2	37	85.4	28.2	276.9	31	1.7	5.2	5.4	2.1	270.8	21	16.1905	16.3522	6.75	8.04598	4439.34	210	Yes	No	1	Yes	No	Iron Deficiency Anemia	Iron Deficiency Anemia	Failure	1	Failure	1	Success	0	0	0	1	0	0	XI Diseases of the digestive system	500-1000mg
87	F	48	Metrorragias	XIV Diseases of the genitourinary system	8.1	25.6	64.4	20.3	2.9	2	#N/A	10.7	28.3	74.6	28.8	8	11	2.6	2.7	10.2	8.5	5.1	9	32.0988	10.5469	15.8385	41.8719	175.862	450	Yes	Yes	1	Yes	Yes	Iron Deficiency Anemia	Iron Deficiency Anemia	Success	0	Failure	1	Failure	1	1	0	0	0	0	XIV Diseases of the genitourinary system	500-1000mg
88	M	69	DHC	XI Diseases of the digestive system	10.5	31.3	93.6	31.5	101.6	13	#N/A	11.3	34.2	90.8	29.8	185.6	22	0.8	2.9	-2.8	-1.7	84	9	7.61905	9.26518	-2.99145	-5.39683	82.6772	69.2308	Yes	Yes	1	Yes	No	Iron Deficiency Anemia	Iron Deficiency Anemia	Failure	1	Failure	1	Success	0	0	0	1	0	0	XI Diseases of the digestive system	500mg
89	F	50	Metrorragias	XIV Diseases of the genitourinary system	8.8	28.6	79.7	25.8	0.8	2	#N/A	12	36.6	85.7	28.1	43.9	19	3.2	8	6	2.3	43.1	17	36.3636	27.972	7.52823	8.91473	5387.5	850	Yes	Yes	1	Yes	Yes	Iron Deficiency Anemia	Iron Deficiency Anemia	Success	0	Success	0	Failure	1	1	0	0	0	0	XIV Diseases of the genitourinary system	500-1000mg
90	F	55	Cirurgia bariatrica	XI Diseases of the digestive system	12.6	38.4	88	27.1	8	7	#N/A	13.5	41.4	94.7	31	229	47	0.9	3	6.7	3.9	221	40	7.14286	7.8125	7.61364	14.3911	2762.5	571.429	No	No	0	Yes	No	Iron Deficiency without Anemia	Non-Iron Deficiency Anemia	Failure	1	Failure	1	Success	0	0	0	1	0	0	XI Diseases of the digestive system	500-1000mg
91	F	67	Hemorragia digestiva baixa	XI Diseases of the digestive system	8	27.2	73.7	21.6	2.6	2	#N/A	12.2	36.3	80.1	27	151.7	11	4.2	9.1	6.4	5.4	149.1	9	52.5	33.4559	8.68385	25	5734.62	450	Yes	No	1	Yes	Yes	Iron Deficiency Anemia	Iron Deficiency Anemia	Success	0	Success	0	Failure	1	0	0	1	0	0	XI Diseases of the digestive system	500-1000mg
92	F	37	Metrorragias	XIV Diseases of the genitourinary system	10.8	33.3	76.9	24.9	6	7.1	#N/A	13	39.8	80.7	26.3	156.7	23	2.2	6.5	3.8	1.4	150.7	15.9	20.3704	19.5195	4.94148	5.62249	2511.67	223.944	Yes	No	1	Yes	No	Iron Deficiency Anemia	Iron Deficiency Anemia	Success	0	Failure	1	Success	0	1	0	0	0	0	XIV Diseases of the genitourinary system	500-1000mg
93	F	26	Metrorragias	XIV Diseases of the genitourinary system	11.4	36	84.6	26.8	9.4	10	#N/A	12.7	38	85.3	28.5	100.9	29	1.3	2	0.7	1.7	91.5	19	11.4035	5.55556	0.827423	6.34328	973.404	190	Yes	No	1	Yes	No	Iron Deficiency Anemia	Iron Deficiency Anemia	Failure	1	Failure	1	Success	0	1	0	0	0	0	XIV Diseases of the genitourinary system	500mg
94	F	69	Insuf card	IX Diseases of the circulatory system	9.5	29.5	75.7	24.3	21.6	12	#N/A	11.9	36.9	80.8	26.2	259.2	39	2.4	7.4	5.1	1.9	237.6	27	25.2632	25.0847	6.73712	7.81893	1100	225	Yes	Yes	1	Yes	No	Iron Deficiency Anemia	Iron Deficiency Anemia	Success	0	Failure	1	Success	0	0	0	0	1	0	IX Diseases of the circulatory system	500mg
95	F	71	Insuf card	IX Diseases of the circulatory system	12.6	37.8	89.3	29.8	14.8	14	NÃ¡usea	13.5	44.6	99.8	30.6	66.7	48	0.9	6.8	10.5	0.8	51.9	34	7.14286	17.9894	11.7581	2.68456	350.676	242.857	No	No	0	Yes	No	Iron Deficiency without Anemia	Non-Iron Deficiency Anemia	Failure	1	Failure	1	Success	0	0	0	0	1	0	IX Diseases of the circulatory system	500mg
96	F	34	Metrorragias	XIV Diseases of the genitourinary system	10.1	33.9	69.8	20.8	3.3	3	#N/A	13.5	41.1	79	26	33.7	26	3.4	7.2	9.2	5.2	30.4	23	33.6634	21.2389	13.1805	25	921.212	766.667	Yes	No	1	Yes	No	Iron Deficiency Anemia	Iron Deficiency Anemia	Success	0	Success	0	Success	0	1	0	0	0	0	XIV Diseases of the genitourinary system	500-1000mg
97	F	21	Metrorragias	XIV Diseases of the genitourinary system	9.9	30.8	66.4	21.3	3	4.7	#N/A	12.7	39.2	77.3	25	30.8	40	2.8	8.4	10.9	3.7	27.8	35.3	28.2828	27.2727	16.4157	17.3709	926.667	751.064	Yes	No	1	Yes	No	Iron Deficiency Anemia	Iron Deficiency Anemia	Success	0	Failure	1	Success	0	1	0	0	0	0	XIV Diseases of the genitourinary system	500-1000mg
98	F	44	Metrorragias	XIV Diseases of the genitourinary system	10.5	33	86.5	27.5	10.4	9	#N/A	13.5	41.3	91	31.5	185	30	3	8.3	4.5	4	174.6	21	28.5714	25.1515	5.20231	14.5455	1678.85	233.333	Yes	No	1	Yes	No	Iron Deficiency Anemia	Iron Deficiency Anemia	Success	0	Failure	1	Success	0	1	0	0	0	0	XIV Diseases of the genitourinary system	500-1000mg
99	M	77	Insuf card	IX Diseases of the circulatory system	10.2	31	83	27.3	17	9.8	#N/A	11.4	33.7	87	29.4	113	25.1	1.2	2.7	4	2.1	96	15.3	11.7647	8.70968	4.81928	7.69231	564.706	156.122	Yes	Yes	1	Yes	No	Iron Deficiency Anemia	Iron Deficiency Anemia	Failure	1	Failure	1	Success	0	0	0	0	1	0	IX Diseases of the circulatory system	500mg
100	F	18	Metrorragias	XIV Diseases of the genitourinary system	11.8	35.2	79.9	26.7	6.4	6	#N/A	12	36.3	83.6	27.7	44.8	13	0.2	1.1	3.7	1	38.4	7	1.69492	3.125	4.63079	3.74532	600	116.667	Yes	Yes	1	Yes	Yes	Iron Deficiency Anemia	Iron Deficiency Anemia	Failure	1	Failure	1	Failure	1	1	0	0	0	0	XIV Diseases of the genitourinary system	500mg
101	F	69	Angiodisplasia	XI Diseases of the digestive system	9.9	31.9	82.1	25.5	31.4	9	#N/A	11.8	37.6	86	27	150.9	19	1.9	5.7	3.9	1.5	119.5	10	19.1919	17.8683	4.7503	5.88235	380.573	111.111	Yes	Yes	1	Yes	Yes	Iron Deficiency Anemia	Iron Deficiency Anemia	Failure	1	Failure	1	Failure	1	0	0	1	0	0	XI Diseases of the digestive system	500mg
102	F	56	RWO	VII Diseases of the eye and adnexa	12	35.9	83.7	27.9	6.3	7	#N/A	12.2	37.7	85.8	27.9	39.8	15	0.2	1.8	2.1	0	33.5	8	1.66667	5.01393	2.50896	0	531.746	114.286	Yes	No	1	Yes	Yes	Iron Deficiency Anemia	Iron Deficiency Anemia	Failure	1	Failure	1	Failure	1	0	0	0	0	1	Others	500mg
103	F	47	Cirurgia bariatrica	XI Diseases of the digestive system	11.5	36.9	90.3	28.2	7.9	7	#N/A	12.9	40	93.3	30.2	75.6	25	1.4	3.1	3	2	67.7	18	12.1739	8.40108	3.32226	7.0922	856.962	257.143	Yes	No	1	Yes	No	Iron Deficiency Anemia	Iron Deficiency Anemia	Failure	1	Failure	1	Success	0	0	0	1	0	0	XI Diseases of the digestive system	500-1000mg
104	M	59	Gastrite/Ulcera	XI Diseases of the digestive system	11.5	37	74.6	23.2	17.7	6	#N/A	13.5	42.7	77.9	24.5	27.5	9	2	5.7	3.3	1.3	9.8	3	17.3913	15.4054	4.42359	5.60345	55.3672	50	Yes	No	1	Yes	Yes	Iron Deficiency Anemia	Iron Deficiency Anemia	Failure	1	Failure	1	Failure	1	0	0	1	0	0	XI Diseases of the digestive system	500mg
105	F	31	Cirurgia bariatrica	XI Diseases of the digestive system	12.1	37	86.5	28.2	6.2	10	#N/A	12.4	36.9	90.1	30.2	34.4	12	0.3	-0.1	3.6	2	28.2	2	2.47934	-0.27027	4.16185	7.0922	454.839	20	No	No	0	Yes	Yes	Iron Deficiency without Anemia	Non-Iron Deficiency Anemia	Failure	1	Failure	1	Failure	1	0	0	1	0	0	XI Diseases of the digestive system	500mg
106	F	45	Metrorragias	XIV Diseases of the genitourinary system	11.1	34	75	24	4.7	3.8	#N/A	13.1	38.8	83.3	28.2	37.7	21	2	4.8	8.3	4.2	33	17.2	18.018	14.1176	11.0667	17.5	702.128	452.632	Yes	No	1	Yes	No	Iron Deficiency Anemia	Iron Deficiency Anemia	Failure	1	Failure	1	Success	0	1	0	0	0	0	XIV Diseases of the genitourinary system	500mg
107	F	43	Cirurgia bariatrica	XI Diseases of the digestive system	8.9	27.9	70.3	22.3	6.2	4	#N/A	12.5	37.6	87.2	28.9	33.2	31	3.6	9.7	16.9	6.6	27	27	40.4494	34.767	24.0398	29.5964	435.484	675	Yes	No	1	Yes	No	Iron Deficiency Anemia	Iron Deficiency Anemia	Success	0	Success	0	Success	0	0	0	1	0	0	XI Diseases of the digestive system	500-1000mg
108	F	39	Metrorragias	XIV Diseases of the genitourinary system	10.1	33.3	80.4	24.4	4	9	#N/A	13	39.5	90.6	29.8	15	23	2.9	6.2	10.2	5.4	11	14	28.7129	18.6186	12.6866	22.1311	275	155.556	Yes	No	1	Yes	No	Iron Deficiency Anemia	Iron Deficiency Anemia	Success	0	Failure	1	Success	0	1	0	0	0	0	XIV Diseases of the genitourinary system	500mg
109	F	75	Insuf card	IX Diseases of the circulatory system	12.7	39.9	71.2	22.7	13.3	8	#N/A	14	45.5	76.7	23.7	16	10	1.3	5.6	5.5	1	2.7	2	10.2362	14.0351	7.72472	4.40529	20.3008	25	No	No	0	Yes	Yes	Iron Deficiency without Anemia	Non-Iron Deficiency Anemia	Failure	1	Failure	1	Failure	1	0	0	0	1	0	IX Diseases of the circulatory system	500mg
110	F	24	Metrorragias	XIV Diseases of the genitourinary system	12.6	37.8	82.2	27.3	13.6	7	#N/A	12.9	38.8	85.4	28.3	41	18	0.3	1	3.2	1	27.4	11	2.38095	2.6455	3.89294	3.663	201.471	157.143	No	No	0	Yes	Yes	Iron Deficiency without Anemia	Non-Iron Deficiency Anemia	Failure	1	Failure	1	Failure	1	1	0	0	0	0	XIV Diseases of the genitourinary system	500mg
111	F	37	Cirurgia bariatrica	XI Diseases of the digestive system	11.1	35.7	77.9	24.2	5.8	5	#N/A	13	38.8	83.3	28	72.1	20	1.9	3.1	5.4	3.8	66.3	15	17.1171	8.68347	6.93196	15.7025	1143.1	300	Yes	No	1	Yes	No	Iron Deficiency Anemia	Iron Deficiency Anemia	Failure	1	Failure	1	Failure	1	0	0	1	0	0	XI Diseases of the digestive system	500-1000mg
112	M	61	DHC	XI Diseases of the digestive system	11	33.4	63.8	21	6.9	5	#N/A	13.7	42.1	79.2	25.8	8.5	11	2.7	8.7	15.4	4.8	1.6	6	24.5455	26.0479	24.1379	22.8571	23.1884	120	Yes	No	1	Yes	Yes	Iron Deficiency Anemia	Iron Deficiency Anemia	Success	0	Failure	1	Failure	1	0	0	1	0	0	XI Diseases of the digestive system	500-1000mg
113	F	34	Metrorragias	XIV Diseases of the genitourinary system	12	38	78.5	24.8	8.5	8	#N/A	13.3	40.9	85.1	27.7	45.8	47	1.3	2.9	6.6	2.9	37.3	39	10.8333	7.63158	8.40764	11.6935	438.824	487.5	Yes	No	1	Yes	No	Iron Deficiency Anemia	Iron Deficiency Anemia	Failure	1	Failure	1	Success	0	1	0	0	0	0	XIV Diseases of the genitourinary system	500-1000mg
114	F	46	Metrorragias	XIV Diseases of the genitourinary system	10.2	32.9	80.6	24.9	3.1	5	#N/A	12.5	38	91.6	27.3	314	62	2.3	5.1	11	2.4	310.9	57	22.549	15.5015	13.6476	9.63855	10029	1140	Yes	No	1	Yes	No	Iron Deficiency Anemia	Iron Deficiency Anemia	Success	0	Failure	1	Success	0	1	0	0	0	0	XIV Diseases of the genitourinary system	500-1000mg
115	M	48	Gastrectomia	XI Diseases of the digestive system	8.8	30.5	68.2	19.8	1.7	2	#N/A	12.7	41.9	79.2	24.1	45.7	12	3.9	11.4	11	4.3	44	10	44.3182	37.377	16.129	21.7172	2588.24	500	Yes	Yes	1	Yes	Yes	Iron Deficiency Anemia	Iron Deficiency Anemia	Success	0	Success	0	Failure	1	0	0	1	0	0	XI Diseases of the digestive system	500-1000mg
116	F	48	Cirurgia bariatrica	XI Diseases of the digestive system	10.8	35.2	77.5	23.7	3.5	4	#N/A	12.2	38.7	79.7	25.1	154.1	17	1.4	3.5	2.2	1.4	150.6	13	12.963	9.94318	2.83871	5.90717	4302.86	325	Yes	No	1	Yes	Yes	Iron Deficiency Anemia	Iron Deficiency Anemia	Failure	1	Failure	1	Failure	1	0	0	1	0	0	XI Diseases of the digestive system	500-1000mg
117	M	71	Angiodisplasia	XI Diseases of the digestive system	11.3	36	89.4	28.1	33.6	6	#N/A	12.1	38.7	90.3	28.3	40.8	9	0.8	2.7	0.9	0.2	7.2	3	7.07965	7.5	1.00671	0.711744	21.4286	50	Yes	Yes	1	Yes	Yes	Iron Deficiency Anemia	Iron Deficiency Anemia	Failure	1	Failure	1	Failure	1	0	0	1	0	0	XI Diseases of the digestive system	500-1000mg
118	M	56	Neo recto	II Neoplasms	11.6	35.1	88.7	29.4	130.3	21	#N/A	12.1	36.4	93.1	31	346.1	37	0.5	1.3	4.4	1.6	215.8	16	4.31034	3.7037	4.96054	5.44218	165.618	76.1905	Yes	Yes	1	No	No	No Iron Deficiency	Non-Iron Deficiency Anemia	Failure	1	Failure	1	Success	0	0	1	0	0	0	II Neoplasms	500mg
119	F	33	Metrorragias	XIV Diseases of the genitourinary system	12.4	39.8	77	24	6.4	13	#N/A	15.5	47.2	81.7	26.9	17.4	39	3.1	7.4	4.7	2.9	11	26	25	18.593	6.1039	12.0833	171.875	200	No	No	0	Yes	No	Iron Deficiency without Anemia	Non-Iron Deficiency Anemia	Success	0	Success	0	Success	0	1	0	0	0	0	XIV Diseases of the genitourinary system	500-1000mg
120	F	65	Angiodisplasia	XI Diseases of the digestive system	12	34.9	84.9	29.1	34	11	#N/A	12	36.5	89.5	29.4	138.5	24	0	1.6	4.6	0.3	104.5	13	0	4.58453	5.41814	1.03093	307.353	118.182	Yes	Yes	1	Yes	No	Iron Deficiency Anemia	Iron Deficiency Anemia	Failure	1	Failure	1	Success	0	0	0	1	0	0	XI Diseases of the digestive system	500mg
121	M	71	HÃ©rnia do hiato	XI Diseases of the digestive system	13.8	41.4	89	29.6	8.6	13	#N/A	13.4	40.5	90.8	30.1	16.5	17	-0.4	-0.9	1.8	0.5	7.9	4	-2.89855	-2.17391	2.02247	1.68919	91.8605	30.7692	No	No	0	Yes	Yes	Iron Deficiency without Anemia	Non-Iron Deficiency Anemia	Failure	1	Failure	1	Failure	1	0	0	1	0	0	XI Diseases of the digestive system	500mg
122	F	48	DII	XI Diseases of the digestive system	12.9	40	84.4	27.2	5.6	14	NÃ¡usea	13.9	41.1	91	30.9	65	23	1	1.1	6.6	3.7	59.4	9	7.75194	2.75	7.81991	13.6029	1060.71	64.2857	No	No	0	Yes	No	Iron Deficiency without Anemia	Non-Iron Deficiency Anemia	Failure	1	Failure	1	Success	0	0	0	1	0	0	XI Diseases of the digestive system	500-1000mg
123	F	68	Hemorragia digestiva baixa	XI Diseases of the digestive system	11.7	36.1	89	28.8	14.8	8	#N/A	12.6	38.9	91.8	29.8	314	9	0.9	2.8	2.8	1	299.2	1	7.69231	7.75623	3.14607	3.47222	2021.62	12.5	Yes	No	1	Yes	Yes	Iron Deficiency Anemia	Iron Deficiency Anemia	Failure	1	Failure	1	Failure	1	0	0	1	0	0	XI Diseases of the digestive system	500mg
124	F	46	Cirurgia bariatrica	XI Diseases of the digestive system	8.8	29.7	77.2	23.8	2.6	3	#N/A	12.6	39.4	90.9	29.1	136.5	32	3.8	9.7	13.7	5.3	133.9	29	43.1818	32.6599	17.7461	22.2689	5150	966.667	Yes	No	1	Yes	No	Iron Deficiency Anemia	Iron Deficiency Anemia	Success	0	Success	0	Success	0	0	0	1	0	0	XI Diseases of the digestive system	500-1000mg
125	F	48	DII	XI Diseases of the digestive system	11.8	36.4	78.3	25.4	5.2	5	#N/A	13.6	41.4	85.3	28.1	231.5	35	1.8	5	7	2.7	226.3	30	15.2542	13.7363	8.93997	10.6299	4351.92	600	Yes	No	1	Yes	No	Iron Deficiency Anemia	Iron Deficiency Anemia	Failure	1	Failure	1	Success	0	0	0	1	0	0	XI Diseases of the digestive system	500-1000mg
126	F	44	Metrorragias	XIV Diseases of the genitourinary system	11.8	37.3	81.8	25.9	5.9	5	#N/A	14.1	43.1	89.5	29.2	57.3	19	2.3	5.8	7.7	3.3	51.4	14	19.4915	15.5496	9.4132	12.7413	871.186	280	Yes	No	1	Yes	Yes	Iron Deficiency Anemia	Iron Deficiency Anemia	Success	0	Failure	1	Failure	1	1	0	0	0	0	XIV Diseases of the genitourinary system	500-1000mg
127	F	54	Metrorragias	XIV Diseases of the genitourinary system	9.9	31.6	74.2	23.3	2.5	5	#N/A	12.6	37.8	79.7	26.5	86.6	37	2.7	6.2	5.5	3.2	84.1	32	27.2727	19.6203	7.4124	13.7339	3364	640	Yes	No	1	Yes	No	Iron Deficiency Anemia	Iron Deficiency Anemia	Success	0	Failure	1	Success	0	1	0	0	0	0	XIV Diseases of the genitourinary system	500-1000mg
128	M	41	DII	XI Diseases of the digestive system	11.3	33.2	88.8	30.2	5.7	10	#N/A	12.8	37.8	96.9	32.8	417.7	28	1.5	4.6	8.1	2.6	412	18	13.2743	13.8554	9.12162	8.60927	7228.07	180	Yes	Yes	1	Yes	No	Iron Deficiency Anemia	Iron Deficiency Anemia	Failure	1	Failure	1	Success	0	0	0	1	0	0	XI Diseases of the digestive system	500-1000mg
129	F	72	Neo mama	II Neoplasms	12.1	38	94.3	30	15	9	#N/A	12.9	38.6	96.8	32.3	195.8	19	0.8	0.6	2.5	2.3	180.8	10	6.61157	1.57895	2.65111	7.66667	1205.33	111.111	No	No	0	Yes	Yes	Iron Deficiency without Anemia	Non-Iron Deficiency Anemia	Failure	1	Failure	1	Failure	1	0	1	0	0	0	II Neoplasms	500mg
130	M	87	Hemorragia digestiva baixa	XI Diseases of the digestive system	10.6	32.9	91.9	29.7	48.2	22	#N/A	12.5	39.9	97.3	30.4	174.5	36	1.9	7	5.4	0.7	126.3	14	17.9245	21.2766	5.87595	2.3569	262.033	63.6364	Yes	Yes	1	No	No	No Iron Deficiency	Non-Iron Deficiency Anemia	Failure	1	Failure	1	Success	0	0	0	1	0	0	XI Diseases of the digestive system	500mg
131	M	88	DII	XI Diseases of the digestive system	8.8	27.8	71.6	22.8	9.2	11	#N/A	10.3	32.8	76.1	23.8	47.8	16.5	1.5	5	4.5	1	38.6	5.5	17.0455	17.9856	6.28492	4.38596	419.565	50	Yes	Yes	1	Yes	Yes	Iron Deficiency Anemia	Iron Deficiency Anemia	Failure	1	Failure	1	Failure	1	0	0	1	0	0	XI Diseases of the digestive system	500mg
132	F	57	HÃ©rnia do hiato	XI Diseases of the digestive system	8.3	27.8	78.7	23.5	8	9.2	#N/A	13.5	41.2	82.8	27.1	87.8	22	5.2	13.4	4.1	3.6	79.8	12.8	62.6506	48.2014	5.20966	15.3191	997.5	139.13	Yes	No	1	Yes	No	Iron Deficiency Anemia	Iron Deficiency Anemia	Success	0	Success	0	Success	0	0	0	1	0	0	XI Diseases of the digestive system	500-1000mg
133	F	32	Metrorragias	XIV Diseases of the genitourinary system	12.1	37	83	26.1	7	12	#N/A	12.8	39	85.2	27.3	55	19	0.7	2	2.2	1.2	48	7	5.78512	5.40541	2.6506	4.5977	685.714	58.3333	No	No	0	Yes	Yes	Iron Deficiency without Anemia	Non-Iron Deficiency Anemia	Failure	1	Failure	1	Failure	1	1	0	0	0	0	XIV Diseases of the genitourinary system	500mg
134	F	61	Angiodisplasia	XI Diseases of the digestive system	9.1	29.2	77	23.9	4.9	6	#N/A	11.5	35.3	91.4	29.7	281.6	30	2.4	6.1	14.4	5.8	276.7	24	26.3736	20.8904	18.7013	24.2678	5646.94	400	Yes	Yes	1	Yes	No	Iron Deficiency Anemia	Iron Deficiency Anemia	Success	0	Failure	1	Success	0	0	0	1	0	0	XI Diseases of the digestive system	500mg
135	F	49	DII	XI Diseases of the digestive system	12.4	38.5	84.2	27.2	6.3	8	#N/A	13.5	40.7	88.7	29.4	60	17	1.1	2.2	4.5	2.2	53.7	9	8.87097	5.71429	5.34442	8.08824	852.381	112.5	No	No	0	Yes	Yes	Iron Deficiency without Anemia	Non-Iron Deficiency Anemia	Failure	1	Failure	1	Failure	1	0	0	1	0	0	XI Diseases of the digestive system	500mg
136	F	82	Angiodisplasia	XI Diseases of the digestive system	12.5	38.5	89.7	29.1	29.2	9	#N/A	12.6	40.1	95.8	30	33.8	12	0.1	1.6	6.1	0.9	4.6	3	0.8	4.15584	6.80045	3.09278	15.7534	33.3333	No	No	0	Yes	Yes	Iron Deficiency without Anemia	Non-Iron Deficiency Anemia	Failure	1	Failure	1	Failure	1	0	0	1	0	0	XI Diseases of the digestive system	500mg
137	F	42	Metrorragias	XIV Diseases of the genitourinary system	11.9	36.3	83.7	27.3	6.6	20	#N/A	12.1	38.1	86.9	27.5	156.5	46	0.2	1.8	3.2	0.2	149.9	26	1.68067	4.95868	3.82318	0.732601	2271.21	130	Yes	No	1	No	No	No Iron Deficiency	Non-Iron Deficiency Anemia	Failure	1	Failure	1	Success	0	1	0	0	0	0	XIV Diseases of the genitourinary system	500mg
138	F	67	Gastrectomia	XI Diseases of the digestive system	10.1	31.9	83.1	26.3	6.5	6	#N/A	13.2	40.2	90.4	29.8	15.6	29	3.1	8.3	7.3	3.5	9.1	23	30.6931	26.0188	8.7846	13.308	140	383.333	Yes	No	1	Yes	No	Iron Deficiency Anemia	Iron Deficiency Anemia	Success	0	Success	0	Success	0	0	0	1	0	0	XI Diseases of the digestive system	500-1000mg
139	F	52	DII	XI Diseases of the digestive system	11.5	36.4	80.1	25.4	16.5	8	Urticaria	13.2	41.7	86	27.5	24.9	15	1.7	5.3	5.9	2.1	8.4	7	14.7826	14.5604	7.36579	8.26772	50.9091	87.5	Yes	No	1	Yes	Yes	Iron Deficiency Anemia	Iron Deficiency Anemia	Failure	1	Failure	1	Failure	1	0	0	1	0	0	XI Diseases of the digestive system	500mg
140	F	54	Metrorragias	XIV Diseases of the genitourinary system	11.9	36.8	82.4	26.5	7.3	4	#N/A	15	45.6	86.6	28.5	19.3	25	3.1	8.8	4.2	2	12	21	26.0504	23.913	5.09709	7.54717	164.384	525	Yes	No	1	Yes	No	Iron Deficiency Anemia	Iron Deficiency Anemia	Success	0	Success	0	Success	0	1	0	0	0	0	XIV Diseases of the genitourinary system	500-1000mg
141	F	43	Metrorragias	XIV Diseases of the genitourinary system	10.1	31.2	79.9	25.9	11.2	5	#N/A	14.4	43.6	96	31.8	57	31	4.3	12.4	16.1	5.9	45.8	26	42.5743	39.7436	20.1502	22.7799	408.929	520	Yes	No	1	Yes	No	Iron Deficiency Anemia	Iron Deficiency Anemia	Success	0	Success	0	Success	0	1	0	0	0	0	XIV Diseases of the genitourinary system	500-1000mg
142	F	48	Vegan	IV Endocrine, nutritional and metabolic diseases	11.6	36	91	29.4	9.6	14	#N/A	13.4	41.4	94.3	30.6	46	22	1.8	5.4	3.3	1.2	36.4	8	15.5172	15	3.62637	4.08163	379.167	57.1429	Yes	No	1	Yes	No	Iron Deficiency Anemia	Iron Deficiency Anemia	Failure	1	Failure	1	Success	0	0	0	0	0	1	Others	500mg
143	M	74	Hemorragia digestiva baixa	XI Diseases of the digestive system	9.3	30.8	64	19.3	9.8	6	#N/A	14.9	46.4	81.6	26.2	32.8	16	5.6	15.6	17.6	6.9	23	10	60.2151	50.6494	27.5	35.7513	234.694	166.667	Yes	No	1	Yes	Yes	Iron Deficiency Anemia	Iron Deficiency Anemia	Success	0	Success	0	Failure	1	0	0	1	0	0	XI Diseases of the digestive system	500-1000mg
144	M	95	Insuf card	IX Diseases of the circulatory system	8.1	24.8	94.5	30.8	243	13	#N/A	10.3	31.5	100.9	33	310.5	24	2.2	6.7	6.4	2.2	67.5	11	27.1605	27.0161	6.77249	7.14286	27.7778	84.6154	Yes	Yes	1	Yes	No	Iron Deficiency Anemia	Iron Deficiency Anemia	Success	0	Failure	1	Success	0	0	0	0	1	0	IX Diseases of the circulatory system	500mg
145	F	53	SPI	VI Diseases of the nervous system	12	37.5	89.5	27.3	5.9	10	#N/A	13.2	42.1	94.5	29.7	104.6	39	1.2	4.6	5	2.4	98.7	29	10	12.2667	5.58659	8.79121	1672.88	290	Yes	No	1	Yes	No	Iron Deficiency Anemia	Iron Deficiency Anemia	Failure	1	Failure	1	Success	0	0	0	0	0	1	Others	500mg
146	F	85	Neo mama	II Neoplasms	9	28.9	70.9	22	7.4	7	#N/A	12.1	38.1	84.4	26.9	50.6	18	3.1	9.2	13.5	4.9	43.2	11	34.4444	31.8339	19.0409	22.2727	583.784	157.143	Yes	No	1	Yes	Yes	Iron Deficiency Anemia	Iron Deficiency Anemia	Success	0	Success	0	Failure	1	0	1	0	0	0	II Neoplasms	500mg
147	M	83	Gastrectomia	XI Diseases of the digestive system	11	35	76.7	24.1	10	5	#N/A	12.8	40.5	85.4	27.1	38	17	1.8	5.5	8.7	3	28	12	16.3636	15.7143	11.3429	12.4481	280	240	Yes	Yes	1	Yes	Yes	Iron Deficiency Anemia	Iron Deficiency Anemia	Failure	1	Failure	1	Failure	1	0	0	1	0	0	XI Diseases of the digestive system	500mg
148	F	54	Cirurgia bariatrica	XI Diseases of the digestive system	10.9	36	77.9	23.6	4.7	5	#N/A	14.5	46	89.3	28.2	7.3	9	3.6	10	11.4	4.6	2.6	4	33.0275	27.7778	14.6341	19.4915	55.3191	80	Yes	No	1	Yes	Yes	Iron Deficiency Anemia	Iron Deficiency Anemia	Success	0	Success	0	Failure	1	0	0	1	0	0	XI Diseases of the digestive system	500mg
149	F	44	Vegan	IV Endocrine, nutritional and metabolic diseases	8.2	28.9	70.6	20.1	4.7	2	Mialgias	12.9	42	90	27.7	42	27	4.7	13.1	19.4	7.6	37.3	25	57.3171	45.3287	27.4788	37.8109	793.617	1250	Yes	No	1	Yes	No	Iron Deficiency Anemia	Iron Deficiency Anemia	Success	0	Success	0	Success	0	0	0	0	0	1	Others	500-1000mg
150	F	56	Cirurgia bariatrica	XI Diseases of the digestive system	9.7	33.2	72	21	6.5	4	#N/A	12.8	42.9	85.3	25.4	248.7	24	3.1	9.7	13.3	4.4	242.2	20	31.9588	29.2169	18.4722	20.9524	3726.15	500	Yes	No	1	Yes	No	Iron Deficiency Anemia	Iron Deficiency Anemia	Success	0	Success	0	Success	0	0	0	1	0	0	XI Diseases of the digestive system	500-1000mg
151	F	42	Cirurgia bariatrica	XI Diseases of the digestive system	9.6	32	73.2	21.9	3.1	5	#N/A	13	41.4	86	27.1	13.2	26	3.4	9.4	12.8	5.2	10.1	21	35.4167	29.375	17.4863	23.7443	325.806	420	Yes	No	1	Yes	No	Iron Deficiency Anemia	Iron Deficiency Anemia	Success	0	Success	0	Success	0	0	0	1	0	0	XI Diseases of the digestive system	500-1000mg
152	F	40	Metrorragias	XIV Diseases of the genitourinary system	11.6	34.4	88.5	29.6	12.2	7	#N/A	11.6	34.5	88.7	29.8	12.6	23	0	0.1	0.2	0.2	0.4	16	0	0.290698	0.225989	0.675676	3.27869	228.571	Yes	Yes	1	Yes	No	Iron Deficiency Anemia	Iron Deficiency Anemia	Failure	1	Failure	1	Success	0	1	0	0	0	0	XIV Diseases of the genitourinary system	500mg
153	F	41	Metrorragias	XIV Diseases of the genitourinary system	11.7	35.8	81.7	26.7	45.6	12	#N/A	13.1	38.5	86.2	29.2	89.2	32	1.4	2.7	4.5	2.5	43.6	20	11.9658	7.5419	5.50796	9.3633	95.614	166.667	Yes	No	1	Yes	No	Iron Deficiency Anemia	Iron Deficiency Anemia	Failure	1	Failure	1	Success	0	1	0	0	0	0	XIV Diseases of the genitourinary system	500mg
154	F	49	Metrorragias	XIV Diseases of the genitourinary system	10.1	31.7	71.7	22.8	3.5	4	#N/A	12.9	39	80.3	26.6	147	25	2.8	7.3	8.6	3.8	143.5	21	27.7228	23.0284	11.9944	16.6667	4100	525	Yes	No	1	Yes	No	Iron Deficiency Anemia	Iron Deficiency Anemia	Success	0	Failure	1	Success	0	1	0	0	0	0	XIV Diseases of the genitourinary system	500mg
155	F	46	Metrorragias	XIV Diseases of the genitourinary system	12.1	37.3	79.9	26	12.2	12	#N/A	13.1	41	81.3	26	14.6	16	1	3.7	1.4	0	2.4	4	8.26446	9.91957	1.75219	0	19.6721	33.3333	No	No	0	Yes	Yes	Iron Deficiency without Anemia	Non-Iron Deficiency Anemia	Failure	1	Failure	1	Failure	1	1	0	0	0	0	XIV Diseases of the genitourinary system	500mg
156	F	62	Insuf card	IX Diseases of the circulatory system	10.2	33.6	79.3	24.1	5.6	10	#N/A	11.5	36	86.7	27.7	436.8	47	1.3	2.4	7.4	3.6	431.2	37	12.7451	7.14286	9.33165	14.9378	7700	370	Yes	Yes	1	Yes	No	Iron Deficiency Anemia	Iron Deficiency Anemia	Failure	1	Failure	1	Success	0	0	0	0	1	0	IX Diseases of the circulatory system	500-1000mg
157	F	79	Neo urotÃ©lio	II Neoplasms	9.1	28.8	83.2	26.3	17.3	6	#N/A	12.9	40	89.6	28.8	224.7	28	3.8	11.2	6.4	2.5	207.4	22	41.7582	38.8889	7.69231	9.5057	1198.84	366.667	Yes	No	1	Yes	No	Iron Deficiency Anemia	Iron Deficiency Anemia	Success	0	Success	0	Success	0	0	1	0	0	0	II Neoplasms	500mg
158	F	44	SPI	VI Diseases of the nervous system	11.7	37.6	79.1	24.6	8.8	7	#N/A	12.3	38.1	81.6	26.3	31.7	9	0.6	0.5	2.5	1.7	22.9	2	5.12821	1.32979	3.16056	6.91057	260.227	28.5714	Yes	No	1	Yes	Yes	Iron Deficiency Anemia	Iron Deficiency Anemia	Failure	1	Failure	1	Failure	1	0	0	0	0	1	Others	500mg
159	F	42	Metrorragias	XIV Diseases of the genitourinary system	7.4	26	66.6	19	3.4	2	#N/A	11.7	36.9	82.1	26.1	125.4	23	4.3	10.9	15.5	7.1	122	21	58.1081	41.9231	23.2733	37.3684	3588.24	1050	Yes	Yes	1	Yes	No	Iron Deficiency Anemia	Iron Deficiency Anemia	Success	0	Success	0	Success	0	1	0	0	0	0	XIV Diseases of the genitourinary system	500-1000mg
160	F	82	Angiodisplasia	XI Diseases of the digestive system	12.5	38.5	89.7	29.1	29.2	9	#N/A	12.6	40.1	95.8	30	33.8	12	0.1	1.6	6.1	0.9	4.6	3	0.8	4.15584	6.80045	3.09278	15.7534	33.3333	No	No	0	Yes	Yes	Iron Deficiency without Anemia	Non-Iron Deficiency Anemia	Failure	1	Failure	1	Failure	1	0	0	1	0	0	XI Diseases of the digestive system	500mg
161	F	70	SPI	VI Diseases of the nervous system	13.7	42.1	87.3	28.4	6.4	11	#N/A	14.6	44.3	92.2	30.3	173.3	27	0.9	2.2	4.9	1.9	166.9	16	6.56934	5.22565	5.61283	6.69014	2607.81	145.455	No	No	0	Yes	No	Iron Deficiency without Anemia	Non-Iron Deficiency Anemia	Failure	1	Failure	1	Success	0	0	0	0	0	1	Others	500mg
162	F	79	Angiodisplasia	XI Diseases of the digestive system	7.9	24.3	93.9	30.1	18.9	8	#N/A	9.7	32.1	93.8	28.3	78	17	1.8	7.8	-0.1	-1.8	59.1	9	22.7848	32.0988	-0.106496	-5.98007	312.698	112.5	Yes	Yes	1	Yes	Yes	Iron Deficiency Anemia	Iron Deficiency Anemia	Failure	1	Failure	1	Failure	1	0	0	1	0	0	XI Diseases of the digestive system	500-1000mg
163	M	84	Angiodisplasia	XI Diseases of the digestive system	8.3	29.8	77.2	21.5	4.5	4	#N/A	11.2	37	84.2	25.5	86.4	19	2.9	7.2	7	4	81.9	15	34.9398	24.1611	9.06736	18.6047	1820	375	Yes	Yes	1	Yes	Yes	Iron Deficiency Anemia	Iron Deficiency Anemia	Success	0	Failure	1	Failure	1	0	0	1	0	0	XI Diseases of the digestive system	500-1000mg
164	F	65	Insuf card	IX Diseases of the circulatory system	10.2	31	83.1	27.3	7.9	9	#N/A	12	35.9	90.6	30.3	141.1	25	1.8	4.9	7.5	3	133.2	16	17.6471	15.8065	9.02527	10.989	1686.08	177.778	Yes	Yes	1	Yes	No	Iron Deficiency Anemia	Iron Deficiency Anemia	Failure	1	Failure	1	Success	0	0	0	0	1	0	IX Diseases of the circulatory system	500-1000mg
165	M	84	Hemorragia digestiva baixa	XI Diseases of the digestive system	10.2	31.4	86.7	28.1	83.8	11	#N/A	11.6	37	88	27.5	290.4	21	1.4	5.6	1.3	-0.6	206.6	10	13.7255	17.8344	1.49942	-2.13523	246.539	90.9091	Yes	Yes	1	Yes	No	Iron Deficiency Anemia	Iron Deficiency Anemia	Failure	1	Failure	1	Success	0	0	0	1	0	0	XI Diseases of the digestive system	500mg
166	F	78	Anemia /ferropÃ©nia	III Diseases of the blood and blood-forming organs and certain disorders involving the immune mechanism	9.5	30.1	91.4	28.7	393.9	13	#N/A	11.8	35.1	87.9	29.7	604.8	27	2.3	5	-3.5	1	210.9	14	24.2105	16.6113	-3.82932	3.48432	53.5415	107.692	Yes	Yes	1	Yes	No	Iron Deficiency Anemia	Iron Deficiency Anemia	Success	0	Failure	1	Success	0	0	0	0	0	1	Others	500-1000mg
167	M	60	DHC	XI Diseases of the digestive system	9.4	28.1	80.7	26.9	9.6	14	#N/A	10.5	29.3	87	31.3	27.5	24	1.1	1.2	6.3	4.4	17.9	10	11.7021	4.27046	7.80669	16.3569	186.458	71.4286	Yes	Yes	1	Yes	No	Iron Deficiency Anemia	Iron Deficiency Anemia	Failure	1	Failure	1	Success	0	0	0	1	0	0	XI Diseases of the digestive system	500-1000mg
168	F	71	Hemorragia digestiva baixa	XI Diseases of the digestive system	12.7	38.7	94.2	30.9	31.5	13	#N/A	13.4	40.2	91.3	30.5	107.9	18	0.7	1.5	-2.9	-0.4	76.4	5	5.51181	3.87597	-3.07856	-1.2945	242.54	38.4615	No	No	0	Yes	Yes	Iron Deficiency without Anemia	Non-Iron Deficiency Anemia	Failure	1	Failure	1	Failure	1	0	0	1	0	0	XI Diseases of the digestive system	500-1000mg
169	F	60	Metrorragias	XIV Diseases of the genitourinary system	13.5	42.6	84.4	26.7	95.1	15	#N/A	14.3	43	84.5	28	273.9	24	0.8	0.4	0.1	1.3	178.8	9	5.92593	0.938967	0.118483	4.86891	188.013	60	No	No	0	Yes	No	Iron Deficiency without Anemia	Non-Iron Deficiency Anemia	Failure	1	Failure	1	Success	0	1	0	0	0	0	XIV Diseases of the genitourinary system	500mg
170	F	76	Neo colon	II Neoplasms	10.2	30.9	77.2	25.5	5.5	12	#N/A	12.2	34.6	80	28.2	298.6	38	2	3.7	2.8	2.7	293.1	26	19.6078	11.9741	3.62694	10.5882	5329.09	216.667	Yes	No	1	Yes	No	Iron Deficiency Anemia	Iron Deficiency Anemia	Failure	1	Failure	1	Success	0	0	1	0	0	0	II Neoplasms	500-1000mg
171	F	66	Gastrite/Ulcera	XI Diseases of the digestive system	10.4	31.7	74.6	24.5	4.7	7	#N/A	13	38.2	83.5	28.5	350.9	23	2.6	6.5	8.9	4	346.2	16	25	20.5047	11.9303	16.3265	7365.96	228.571	Yes	No	1	Yes	No	Iron Deficiency Anemia	Iron Deficiency Anemia	Success	0	Failure	1	Success	0	0	0	1	0	0	XI Diseases of the digestive system	500-1000mg
172	F	48	Vegan	IV Endocrine, nutritional and metabolic diseases	10.4	33.6	70	21.6	21.4	6	#N/A	11.6	36.9	77.9	24.6	94	9	1.2	3.3	7.9	3	72.6	3	11.5385	9.82143	11.2857	13.8889	339.252	50	Yes	Yes	1	Yes	Yes	Iron Deficiency Anemia	Iron Deficiency Anemia	Failure	1	Failure	1	Failure	1	0	0	0	0	1	Others	500mg
173	M	70	IRC	XIV Diseases of the genitourinary system	6.7	20.6	79.7	26	27.4	5	#N/A	9.4	29.2	88.9	28.6	982.8	39	2.7	8.6	9.2	2.6	955.4	34	40.2985	41.7476	11.5433	10	3486.86	680	Yes	Yes	1	Yes	No	Iron Deficiency Anemia	Iron Deficiency Anemia	Success	0	Failure	1	Success	0	1	0	0	0	0	XIV Diseases of the genitourinary system	500-1000mg
174	F	68	IRC	XIV Diseases of the genitourinary system	9.5	29	83.7	27.3	124	12	#N/A	10.6	30.8	79.3	27.3	416	18	1.1	1.8	-4.4	0	292	6	11.5789	6.2069	-5.25687	0	235.484	50	Yes	Yes	1	Yes	Yes	Iron Deficiency Anemia	Iron Deficiency Anemia	Failure	1	Failure	1	Failure	1	1	0	0	0	0	XIV Diseases of the genitourinary system	500mg
175	F	51	Metrorragias	XIV Diseases of the genitourinary system	11.7	35.6	87.3	28.8	6	12	#N/A	14.1	42.5	92	30.5	239.7	35	2.4	6.9	4.7	1.7	233.7	23	20.5128	19.382	5.38373	5.90278	3895	191.667	Yes	No	1	Yes	No	Iron Deficiency Anemia	Iron Deficiency Anemia	Success	0	Failure	1	Success	0	1	0	0	0	0	XIV Diseases of the genitourinary system	500-1000mg
176	F	46	Metrorragias	XIV Diseases of the genitourinary system	12.6	38.7	84.7	27.6	8.7	11	#N/A	13.9	43	94.9	30.7	14.8	20	1.3	4.3	10.2	3.1	6.1	9	10.3175	11.1111	12.0425	11.2319	70.1149	81.8182	No	No	0	Yes	No	Iron Deficiency without Anemia	Non-Iron Deficiency Anemia	Failure	1	Failure	1	Failure	1	1	0	0	0	0	XIV Diseases of the genitourinary system	500mg
177	M	86	Insuf card	IX Diseases of the circulatory system	11	32.9	98.3	32.9	54.6	17	#N/A	11.7	35.5	103.1	34	751	33	0.7	2.6	4.8	1.1	696.4	16	6.36364	7.90274	4.88301	3.34347	1275.46	94.1176	Yes	Yes	1	Yes	No	Iron Deficiency Anemia	Iron Deficiency Anemia	Failure	1	Failure	1	Success	0	0	0	0	1	0	IX Diseases of the circulatory system	500mg
178	M	73	SPI	VI Diseases of the nervous system	13.5	42.4	93.9	29.9	15.9	13	#N/A	15.3	43.8	92.8	32.4	55.7	14	1.8	1.4	-1.1	2.5	39.8	1	13.3333	3.30189	-1.17146	8.3612	250.314	7.69231	No	No	0	Yes	Yes	Iron Deficiency without Anemia	Non-Iron Deficiency Anemia	Failure	1	Failure	1	Failure	1	0	0	0	0	1	Others	500mg
179	M	44	DII	XI Diseases of the digestive system	11.4	33.3	73.4	25	3.6	7	#N/A	13.9	45	83.2	25.7	27.4	29	2.5	11.7	9.8	0.7	23.8	22	21.9298	35.1351	13.3515	2.8	661.111	314.286	Yes	No	1	Yes	No	Iron Deficiency Anemia	Iron Deficiency Anemia	Success	0	Failure	1	Success	0	0	0	1	0	0	XI Diseases of the digestive system	500-1000mg
180	M	69	DHC	XI Diseases of the digestive system	10.5	31.3	96	32.2	101.6	13	#N/A	11.3	34.2	90.8	29.8	185.6	22	0.8	2.9	-5.2	-2.4	84	9	7.61905	9.26518	-5.41667	-7.45342	82.6772	69.2308	Yes	Yes	1	Yes	No	Iron Deficiency Anemia	Iron Deficiency Anemia	Failure	1	Failure	1	Success	0	0	0	1	0	0	XI Diseases of the digestive system	500mg
181	M	79	Angiodisplasia	XI Diseases of the digestive system	12.6	39	74.6	24.1	10.7	8	#N/A	13.6	41.2	80.7	26.6	77	15	1	2.2	6.1	2.5	66.3	7	7.93651	5.64103	8.17694	10.3734	619.626	87.5	Yes	No	1	Yes	Yes	Iron Deficiency Anemia	Iron Deficiency Anemia	Failure	1	Failure	1	Failure	1	0	0	1	0	0	XI Diseases of the digestive system	500mg
182	F	19	Metrorragias	XIV Diseases of the genitourinary system	12.9	38.4	86.7	29	3.9	3	#N/A	14.1	42.6	93.8	31.2	185	53	1.2	4.2	7.1	2.2	181.1	50	9.30233	10.9375	8.18916	7.58621	4643.59	1666.67	No	No	0	Yes	No	Iron Deficiency without Anemia	Non-Iron Deficiency Anemia	Failure	1	Failure	1	Success	0	1	0	0	0	0	XIV Diseases of the genitourinary system	500-1000mg
183	M	83	Hemorragia digestiva baixa	XI Diseases of the digestive system	11.6	35.7	84.6	27.4	43.9	13	#N/A	12.3	38	82.9	26.7	110.8	14	0.7	2.3	-1.7	-0.7	66.9	1	6.03448	6.44258	-2.00946	-2.55474	152.392	7.69231	Yes	Yes	1	Yes	Yes	Iron Deficiency Anemia	Iron Deficiency Anemia	Failure	1	Failure	1	Failure	1	0	0	1	0	0	XI Diseases of the digestive system	500mg
184	F	49	Metrorragias	XIV Diseases of the genitourinary system	10.5	34.1	80.3	24.8	5.6	4	#N/A	11.8	36.6	87.7	28.3	208.7	37	1.3	2.5	7.4	3.5	203.1	33	12.381	7.33138	9.21544	14.1129	3626.79	825	Yes	Yes	1	Yes	No	Iron Deficiency Anemia	Iron Deficiency Anemia	Failure	1	Failure	1	Success	0	1	0	0	0	0	XIV Diseases of the genitourinary system	500-1000mg
185	M	62	Gastrectomia	XI Diseases of the digestive system	11.7	37.1	91.7	29	11	18	#N/A	13.5	43.4	92.3	28.7	462.1	33	1.8	6.3	0.6	-0.3	451.1	15	15.3846	16.9811	0.654308	-1.03448	4100.91	83.3333	Yes	No	1	Yes	No	Iron Deficiency Anemia	Iron Deficiency Anemia	Failure	1	Failure	1	Success	0	0	0	1	0	0	XI Diseases of the digestive system	500-1000mg
186	F	44	Metrorragias	XIV Diseases of the genitourinary system	10.5	33	86.5	27.5	10.4	9	#N/A	12	36.2	86.5	28.8	128	30	1.5	3.2	0	1.3	117.6	21	14.2857	9.69697	0	4.72727	1130.77	233.333	Yes	Yes	1	Yes	No	Iron Deficiency Anemia	Iron Deficiency Anemia	Failure	1	Failure	1	Success	0	1	0	0	0	0	XIV Diseases of the genitourinary system	500mg
187	F	34	Metrorragias	XIV Diseases of the genitourinary system	10.1	33.9	69.8	20.8	3.3	3	#N/A	13.5	41.1	79	26	33.7	26	3.4	7.2	9.2	5.2	30.4	23	33.6634	21.2389	13.1805	25	921.212	766.667	Yes	No	1	Yes	No	Iron Deficiency Anemia	Iron Deficiency Anemia	Success	0	Success	0	Success	0	1	0	0	0	0	XIV Diseases of the genitourinary system	500-1000mg
188	F	50	Metrorragias	XIV Diseases of the genitourinary system	10.4	32.3	85.9	27.7	5	8	#N/A	13	39.2	91.7	30.4	458.4	25	2.6	6.9	5.8	2.7	453.4	17	25	21.3622	6.75204	9.74729	9068	212.5	Yes	No	1	Yes	No	Iron Deficiency Anemia	Iron Deficiency Anemia	Success	0	Failure	1	Success	0	1	0	0	0	0	XIV Diseases of the genitourinary system	500-1000mg
189	F	19	Metrorragias	XIV Diseases of the genitourinary system	11.8	35.2	79.9	26.7	6.4	6	#N/A	12	36.3	83.6	27.7	44.8	13	0.2	1.1	3.7	1	38.4	7	1.69492	3.125	4.63079	3.74532	600	116.667	Yes	Yes	1	Yes	Yes	Iron Deficiency Anemia	Iron Deficiency Anemia	Failure	1	Failure	1	Failure	1	1	0	0	0	0	XIV Diseases of the genitourinary system	500mg
190	F	55	RWO	VII Diseases of the eye and adnexa	12	35.9	83.7	27.9	6.3	7	#N/A	12.2	37.7	85.8	27.9	39.8	15	0.2	1.8	2.1	0	33.5	8	1.66667	5.01393	2.50896	0	531.746	114.286	Yes	No	1	Yes	Yes	Iron Deficiency Anemia	Iron Deficiency Anemia	Failure	1	Failure	1	Failure	1	0	0	0	0	1	Others	500mg
191	F	68	Gastrectomia	XI Diseases of the digestive system	11.5	35	89	29.2	9.7	8	#N/A	12.8	37.9	90.1	30.5	69.9	25	1.3	2.9	1.1	1.3	60.2	17	11.3043	8.28571	1.23596	4.45205	620.619	212.5	Yes	No	1	Yes	No	Iron Deficiency Anemia	Iron Deficiency Anemia	Failure	1	Failure	1	Success	0	0	0	1	0	0	XI Diseases of the digestive system	500mg
192	M	76	Gastrectomia	XI Diseases of the digestive system	11.9	36.5	84.1	27.3	9	11	#N/A	12.6	38.2	85	27.9	64.5	20	0.7	1.7	0.9	0.6	55.5	9	5.88235	4.65753	1.07015	2.1978	616.667	81.8182	Yes	Yes	1	Yes	No	Iron Deficiency Anemia	Iron Deficiency Anemia	Failure	1	Failure	1	Failure	1	0	0	1	0	0	XI Diseases of the digestive system	500mg
193	M	84	Anemia /ferropÃ©nia	III Diseases of the blood and blood-forming organs and certain disorders involving the immune mechanism	8.4	27.2	82	25.3	24.2	4	#N/A	12.1	37.9	86.4	27.7	75	12	3.7	10.7	4.4	2.4	50.8	8	44.0476	39.3382	5.36585	9.48617	209.917	200	Yes	Yes	1	Yes	Yes	Iron Deficiency Anemia	Iron Deficiency Anemia	Success	0	Success	0	Failure	1	0	0	0	0	1	Others	500-1000mg
194	F	53	Hemorragia digestiva baixa	XI Diseases of the digestive system	8.7	28.2	76.4	23.5	36.9	6	#N/A	10.5	31.9	82.1	27.1	38.1	15	1.8	3.7	5.7	3.6	1.2	9	20.6897	13.1206	7.46073	15.3191	3.25203	150	Yes	Yes	1	Yes	Yes	Iron Deficiency Anemia	Iron Deficiency Anemia	Failure	1	Failure	1	Failure	1	0	0	1	0	0	XI Diseases of the digestive system	500mg
195	M	70	DHC	XI Diseases of the digestive system	9.1	29.8	79.4	24.3	12.5	6	#N/A	10.7	32.1	86.3	28.7	29	12	1.6	2.3	6.9	4.4	16.5	6	17.5824	7.71812	8.69018	18.107	132	100	Yes	Yes	1	Yes	Yes	Iron Deficiency Anemia	Iron Deficiency Anemia	Failure	1	Failure	1	Failure	1	0	0	1	0	0	XI Diseases of the digestive system	500mg
196	F	47	Metrorragias	XIV Diseases of the genitourinary system	11.4	34.9	79.9	26.1	5.5	5	#N/A	12.9	38.4	84.5	28.4	148.3	14	1.5	3.5	4.6	2.3	142.8	9	13.1579	10.0287	5.7572	8.81226	2596.36	180	Yes	No	1	Yes	Yes	Iron Deficiency Anemia	Iron Deficiency Anemia	Failure	1	Failure	1	Failure	1	1	0	0	0	0	XIV Diseases of the genitourinary system	500mg
197	M	44	Insuf card	IX Diseases of the circulatory system	8.6	28	77.7	23.9	30.2	3	#N/A	10.2	30.8	82.7	27.5	79	15	1.6	2.8	5	3.6	48.8	12	18.6047	10	6.43501	15.0628	161.589	400	Yes	Yes	1	Yes	Yes	Iron Deficiency Anemia	Iron Deficiency Anemia	Failure	1	Failure	1	Failure	1	0	0	0	1	0	IX Diseases of the circulatory system	>1000mg
198	F	83	Insuf card	IX Diseases of the circulatory system	9.2	32.3	78.7	22.3	9.9	5	#N/A	10.1	32.3	85	26.6	143.3	17.5	0.9	0	6.3	4.3	133.4	12.5	9.78261	0	8.00508	19.2825	1347.47	250	Yes	Yes	1	Yes	Yes	Iron Deficiency Anemia	Iron Deficiency Anemia	Failure	1	Failure	1	Failure	1	0	0	0	1	0	IX Diseases of the circulatory system	500mg
199	F	83	Insuf card	IX Diseases of the circulatory system	10.2	31.3	85.2	27.7	13.2	11	#N/A	11.1	34.3	92.8	29.9	167.4	31	0.9	3	7.6	2.2	154.2	20	8.82353	9.58466	8.92019	7.94224	1168.18	181.818	Yes	Yes	1	Yes	No	Iron Deficiency Anemia	Iron Deficiency Anemia	Failure	1	Failure	1	Success	0	0	0	0	1	0	IX Diseases of the circulatory system	500mg
200	F	67	HTP	IX Diseases of the circulatory system	9.1	30.6	72.1	21.5	10.2	4	#N/A	11.1	35.7	73.7	23	59	9	2	5.1	1.6	1.5	48.8	5	21.978	16.6667	2.21914	6.97674	478.431	125	Yes	Yes	1	Yes	Yes	Iron Deficiency Anemia	Iron Deficiency Anemia	Failure	1	Failure	1	Failure	1	0	0	0	1	0	IX Diseases of the circulatory system	500mg
201	F	65	Insuf card	IX Diseases of the circulatory system	10	30.6	83	27.1	13	8.9	#N/A	11	33.9	83.4	27.1	104.9	16	1	3.3	0.4	0	91.9	7.1	10	10.7843	0.481928	0	706.923	79.7753	Yes	Yes	1	Yes	Yes	Iron Deficiency Anemia	Iron Deficiency Anemia	Failure	1	Failure	1	Failure	1	0	0	0	1	0	IX Diseases of the circulatory system	500mg
202	F	53	HTP	IX Diseases of the circulatory system	12.6	42	76.8	23	15.6	11	#N/A	13	41.4	80.9	25.4	60.4	17	0.4	-0.6	4.1	2.4	44.8	6	3.1746	-1.42857	5.33854	10.4348	287.179	54.5455	No	No	0	Yes	Yes	Iron Deficiency without Anemia	Non-Iron Deficiency Anemia	Failure	1	Failure	1	Failure	1	0	0	0	1	0	IX Diseases of the circulatory system	500mg
203	M	72	Gastrectomia	XI Diseases of the digestive system	8.4	23.7	62	19	2.2	4	#N/A	10.9	36	74	22	97	20	2.5	12.3	12	3	94.8	16	29.7619	51.8987	19.3548	15.7895	4309.09	400	Yes	Yes	1	Yes	No	Iron Deficiency Anemia	Iron Deficiency Anemia	Success	0	Failure	1	Failure	1	0	0	1	0	0	XI Diseases of the digestive system	500-1000mg
204	F	46	Metrorragias	XIV Diseases of the genitourinary system	10.6	32	76	25	4.6	8	#N/A	12.7	36	82	28	396	43	2.1	4	6	3	391.4	35	19.8113	12.5	7.89474	12	8508.7	437.5	Yes	No	1	Yes	No	Iron Deficiency Anemia	Iron Deficiency Anemia	Success	0	Failure	1	Success	0	1	0	0	0	0	XIV Diseases of the genitourinary system	>1000mg
205	F	52	Metrorragias	XIV Diseases of the genitourinary system	8.4	25	79	23	9.8	2	#N/A	12.1	38	86	26	185	26	3.7	13	7	3	175.2	24	44.0476	52	8.86076	13.0435	1787.76	1200	Yes	No	1	Yes	No	Iron Deficiency Anemia	Iron Deficiency Anemia	Success	0	Success	0	Success	0	1	0	0	0	0	XIV Diseases of the genitourinary system	500-1000mg
206	F	57	Metrorragias	XIV Diseases of the genitourinary system	11.9	35	88	29	11.6	19	#N/A	11.3	34	90	29	87	30	-0.6	-1	2	0	75.4	11	-5.04202	-2.85714	2.27273	0	650	57.8947	Yes	Yes	1	Yes	No	Iron Deficiency Anemia	Iron Deficiency Anemia	Failure	1	Failure	1	Success	0	1	0	0	0	0	XIV Diseases of the genitourinary system	>1000mg
207	F	77	DII	XI Diseases of the digestive system	7.3	23	71	22	9.2	5	#N/A	10.3	32	81	26	152	16	3	9	10	4	142.8	11	41.0959	39.1304	14.0845	18.1818	1552.17	220	Yes	Yes	1	Yes	Yes	Iron Deficiency Anemia	Iron Deficiency Anemia	Success	0	Success	0	Failure	1	0	0	1	0	0	XI Diseases of the digestive system	500-1000mg
208	M	20	DII	XI Diseases of the digestive system	9.1	29	67	20	1.8	3	#N/A	14.4	44	84	27	98	26	5.3	15	17	7	96.2	23	58.2418	51.7241	25.3731	35	5344.44	766.667	Yes	No	1	Yes	No	Iron Deficiency Anemia	Iron Deficiency Anemia	Success	0	Success	0	Success	0	0	0	1	0	0	XI Diseases of the digestive system	>1000mg
209	F	38	Vasculite	IX Diseases of the circulatory system	8.7	28	69	21	2.5	2.5	#N/A	12.4	38	83	26	188	20	3.7	10	14	5	185.5	17.5	42.5287	35.7143	20.2899	23.8095	7420	700	Yes	No	1	Yes	No	Iron Deficiency Anemia	Iron Deficiency Anemia	Success	0	Success	0	Failure	1	0	0	0	1	0	IX Diseases of the circulatory system	>1000mg
210	F	33	DII	XI Diseases of the digestive system	12.1	36	75	25	8.9	17	#N/A	14.6	40	87	29	164	25	2.5	4	12	4	155.1	8	20.6612	11.1111	16	16	1742.7	47.0588	No	No	0	Yes	No	Iron Deficiency without Anemia	Non-Iron Deficiency Anemia	Success	0	Failure	1	Success	0	0	0	1	0	0	XI Diseases of the digestive system	500-1000mg
211	F	40	Metrorragias	XIV Diseases of the genitourinary system	9.7	32	80	24	20	2	#N/A	13.2	42	89	27	136	29	3.5	10	9	3	116	27	36.0825	31.25	11.25	12.5	580	1350	Yes	No	1	Yes	No	Iron Deficiency Anemia	Iron Deficiency Anemia	Success	0	Success	0	Success	0	1	0	0	0	0	XIV Diseases of the genitourinary system	>1000mg
212	F	30	Metrorragias	XIV Diseases of the genitourinary system	11.1	36	74	22	4.8	9	#N/A	13.7	41	82	26	116	28	2.6	5	8	4	111.2	19	23.4234	13.8889	10.8108	18.1818	2316.67	211.111	Yes	No	1	Yes	No	Iron Deficiency Anemia	Iron Deficiency Anemia	Success	0	Failure	1	Success	0	1	0	0	0	0	XIV Diseases of the genitourinary system	500-1000mg
213	M	70	Coagulopatia	III Diseases of the blood and blood-forming organs and certain disorders involving the immune mechanism	13	40	75	25	14.5	6	#N/A	14.7	47	81	26	212	21	1.7	7	6	1	197.5	15	13.0769	17.5	8	4	1362.07	250	Yes	No	1	Yes	No	Iron Deficiency Anemia	Iron Deficiency Anemia	Failure	1	Failure	1	Success	0	0	0	0	0	1	Others	>1000mg
214	F	80	Neo Ãºtero	II Neoplasms	9	27	80	26	148	11	#N/A	12	35	87	30	360	21	3	8	7	4	212	10	33.3333	29.6296	8.75	15.3846	143.243	90.9091	Yes	Yes	1	Yes	No	Iron Deficiency Anemia	Iron Deficiency Anemia	Success	0	Failure	1	Success	0	0	1	0	0	0	II Neoplasms	500-1000mg
215	F	85	Angiodisplasia	XI Diseases of the digestive system	10.9	35	89	27	114	7	#N/A	13.4	41	95	31	445	25	2.5	6	6	4	331	18	22.9358	17.1429	6.74157	14.8148	290.351	257.143	Yes	No	1	Yes	No	Iron Deficiency Anemia	Iron Deficiency Anemia	Success	0	Failure	1	Success	0	0	0	1	0	0	XI Diseases of the digestive system	>1000mg
216	F	75	Neo gÃ¡strico	II Neoplasms	10.7	34	109	34	21.3	9	#N/A	12.1	37	104	33	129	13	1.4	3	-5	-1	107.7	4	13.0841	8.82353	-4.58716	-2.94118	505.634	44.4444	Yes	No	1	Yes	Yes	Iron Deficiency Anemia	Iron Deficiency Anemia	Failure	1	Failure	1	Failure	1	0	1	0	0	0	II Neoplasms	>1000mg
217	F	46	DII	XI Diseases of the digestive system	12.5	36	85	29	7	14	#N/A	12.5	37	90	29	190	38	0	1	5	0	183	24	0	2.77778	5.88235	0	2614.29	171.429	No	No	0	Yes	No	Iron Deficiency without Anemia	Non-Iron Deficiency Anemia	Failure	1	Failure	1	Success	0	0	0	1	0	0	XI Diseases of the digestive system	500-1000mg
218	M	29	DII	XI Diseases of the digestive system	12.6	36	87	30	14	8.5	#N/A	12.9	35	93	34	257	38	0.3	-1	6	4	243	29.5	2.38095	-2.77778	6.89655	13.3333	1735.71	347.059	Yes	Yes	1	Yes	No	Iron Deficiency Anemia	Iron Deficiency Anemia	Failure	1	Failure	1	Success	0	0	0	1	0	0	XI Diseases of the digestive system	500-1000mg
219	F	65	DHC	XI Diseases of the digestive system	9.1	29	73	22	10.8	7	#N/A	14.3	40	87	31	207	25	5.2	11	14	9	196.2	18	57.1429	37.931	19.1781	40.9091	1816.67	257.143	Yes	No	1	Yes	No	Iron Deficiency Anemia	Iron Deficiency Anemia	Success	0	Success	0	Success	0	0	0	1	0	0	XI Diseases of the digestive system	>1000mg
220	F	75	IRC	XIV Diseases of the genitourinary system	11.5	35	103	33	33.5	10	#N/A	12.5	39	103	32	154	23	1	4	0	-1	120.5	13	8.69565	11.4286	0	-3.0303	359.701	130	Yes	No	1	Yes	No	Iron Deficiency Anemia	Iron Deficiency Anemia	Failure	1	Failure	1	Success	0	1	0	0	0	0	XIV Diseases of the genitourinary system	500mg
221	F	45	Metrorragias	XIV Diseases of the genitourinary system	8.1	28	67	19	57	3	#N/A	13.1	39	88	29	831	30	5	11	21	10	774	27	61.7284	39.2857	31.3433	52.6316	1357.89	900	Yes	No	1	Yes	No	Iron Deficiency Anemia	Iron Deficiency Anemia	Success	0	Success	0	Success	0	1	0	0	0	0	XIV Diseases of the genitourinary system	>1000mg
222	F	72	Insuf card	IX Diseases of the circulatory system	9.7	31	71	22	5.2	6	#N/A	12.4	36	85	28	276	33	2.7	5	14	6	270.8	27	27.8351	16.129	19.7183	27.2727	5207.69	450	Yes	No	1	Yes	No	Iron Deficiency Anemia	Iron Deficiency Anemia	Success	0	Failure	1	Success	0	0	0	0	1	0	IX Diseases of the circulatory system	>1000mg
223	F	70	DHC	XI Diseases of the digestive system	8.4	27	68	20	5	4	#N/A	13.1	40	95	31	203	31	4.7	13	27	11	198	27	55.9524	48.1481	39.7059	55	3960	675	Yes	No	1	Yes	No	Iron Deficiency Anemia	Iron Deficiency Anemia	Success	0	Success	0	Success	0	0	0	1	0	0	XI Diseases of the digestive system	>1000mg
224	F	73	Neo hematolÃ³gica	II Neoplasms	11	34	86	27	58	12	#N/A	11	33	87	28	442	18	0	-1	1	1	384	6	0	-2.94118	1.16279	3.7037	662.069	50	Yes	Yes	1	Yes	Yes	Iron Deficiency Anemia	Iron Deficiency Anemia	Failure	1	Failure	1	Failure	1	0	1	0	0	0	II Neoplasms	500-1000mg
225	F	76	Angiodisplasia	XI Diseases of the digestive system	10.8	35	84	25	27	7.3	#N/A	13.9	43	88	28	316	26	3.1	8	4	3	289	18.7	28.7037	22.8571	4.7619	12	1070.37	256.164	Yes	No	1	Yes	No	Iron Deficiency Anemia	Iron Deficiency Anemia	Success	0	Success	0	Success	0	0	0	1	0	0	XI Diseases of the digestive system	>1000mg
226	F	68	Gastrite/Ulcera	XI Diseases of the digestive system	11.8	36	83	26	6.4	17	#N/A	12.8	36	85	29	206	39	1	0	2	3	199.6	22	8.47458	0	2.40964	11.5385	3118.75	129.412	Yes	No	1	Yes	No	Iron Deficiency Anemia	Iron Deficiency Anemia	Failure	1	Failure	1	Success	0	0	0	1	0	0	XI Diseases of the digestive system	500-1000mg
227	F	58	Metrorragias	XIV Diseases of the genitourinary system	11.8	36	79	26	16.4	9	#N/A	13.7	41	78	25	235	28	1.9	5	-1	-1	218.6	19	16.1017	13.8889	-1.26582	-3.84615	1332.93	211.111	Yes	No	1	Yes	No	Iron Deficiency Anemia	Iron Deficiency Anemia	Failure	1	Failure	1	Success	0	1	0	0	0	0	XIV Diseases of the genitourinary system	500-1000mg
228	F	64	Cirurgia bariatrica	XI Diseases of the digestive system	10.6	34	94	29	164	16	#N/A	11.2	35	100	32	418	25	0.6	1	6	3	254	9	5.66038	2.94118	6.38298	10.3448	154.878	56.25	Yes	Yes	1	Yes	No	Iron Deficiency Anemia	Iron Deficiency Anemia	Failure	1	Failure	1	Success	0	0	0	1	0	0	XI Diseases of the digestive system	500-1000mg
229	F	65	Neo colon	II Neoplasms	9.9	30	82	26	6.9	7	#N/A	12	35	83	27	225	26	2.1	5	1	1	218.1	19	21.2121	16.6667	1.21951	3.84615	3160.87	271.429	Yes	Yes	1	Yes	No	Iron Deficiency Anemia	Iron Deficiency Anemia	Success	0	Failure	1	Success	0	0	1	0	0	0	II Neoplasms	500-1000mg
230	F	84	Neo colon	II Neoplasms	10.5	34	91	28	137	9	#N/A	11.9	36	93	30	337	15	1.4	2	2	2	200	6	13.3333	5.88235	2.1978	7.14286	145.985	66.6667	Yes	Yes	1	Yes	Yes	Iron Deficiency Anemia	Iron Deficiency Anemia	Failure	1	Failure	1	Failure	1	0	1	0	0	0	II Neoplasms	500-1000mg
231	F	67	Neo recto	II Neoplasms	11.2	34	98	31	66	10	#N/A	12.1	36	99	32	212	19	0.9	2	1	1	146	9	8.03571	5.88235	1.02041	3.22581	221.212	90	Yes	No	1	Yes	Yes	Iron Deficiency Anemia	Iron Deficiency Anemia	Failure	1	Failure	1	Failure	1	0	1	0	0	0	II Neoplasms	500-1000mg
232	F	46	Metrorragias	XIV Diseases of the genitourinary system	8.6	29	70	20	4.8	4	#N/A	13.2	41	80	25	81.5	20	4.6	12	10	5	76.7	16	53.4884	41.3793	14.2857	25	1597.92	400	Yes	No	1	Yes	No	Iron Deficiency Anemia	Iron Deficiency Anemia	Success	0	Success	0	Failure	1	1	0	0	0	0	XIV Diseases of the genitourinary system	500-1000mg
233	F	43	Metrorragias	XIV Diseases of the genitourinary system	7.9	25	81	25	9.8	2	#N/A	12.1	38	86	26	185	26	4.2	13	5	1	175.2	24	53.1646	52	6.17284	4	1787.76	1200	Yes	No	1	Yes	No	Iron Deficiency Anemia	Iron Deficiency Anemia	Success	0	Success	0	Success	0	1	0	0	0	0	XIV Diseases of the genitourinary system	500-1000mg
234	F	46	Gastrite/Ulcera	XI Diseases of the digestive system	10.5	33	77	24	5.5	2	#N/A	12.3	37	80	26	192	31	1.8	4	3	2	186.5	29	17.1429	12.1212	3.8961	8.33333	3390.91	1450	Yes	No	1	Yes	No	Iron Deficiency Anemia	Iron Deficiency Anemia	Failure	1	Failure	1	Success	0	0	0	1	0	0	XI Diseases of the digestive system	500-1000mg
235	F	41	Metrorragias	XIV Diseases of the genitourinary system	8.3	28	60	17	5	2	#N/A	14.1	41	86	29	122	18	5.8	13	26	12	117	16	69.8795	46.4286	43.3333	70.5882	2340	800	Yes	No	1	Yes	Yes	Iron Deficiency Anemia	Iron Deficiency Anemia	Success	0	Success	0	Failure	1	1	0	0	0	0	XIV Diseases of the genitourinary system	>1000mg
236	F	28	D celÃ­aca	XI Diseases of the digestive system	6.1	21	67	19	0.5	1	#N/A	12.3	36	80	27	99	25	6.2	15	13	8	98.5	24	101.639	71.4286	19.403	42.1053	19700	2400	Yes	No	1	Yes	No	Iron Deficiency Anemia	Iron Deficiency Anemia	Success	0	Success	0	Success	0	0	0	1	0	0	XI Diseases of the digestive system	>1000mg
237	F	53	Espondilite anquilosante	XIII Diseases of the musculoskeletal system and connective tissue	10.8	32	79	25	6.2	11	#N/A	12.4	37	88	29	234	37	1.6	5	9	4	227.8	26	14.8148	15.625	11.3924	16	3674.19	236.364	Yes	No	1	Yes	No	Iron Deficiency Anemia	Iron Deficiency Anemia	Failure	1	Failure	1	Success	0	0	0	0	0	1	Others	500-1000mg
238	F	72	Hemorragia digestiva baixa	XI Diseases of the digestive system	8.3	25	83	26	7.9	4	#N/A	10.4	31	88	28	621	27	2.1	6	5	2	613.1	23	25.3012	24	6.0241	7.69231	7760.76	575	Yes	Yes	1	Yes	No	Iron Deficiency Anemia	Iron Deficiency Anemia	Success	0	Failure	1	Success	0	0	0	1	0	0	XI Diseases of the digestive system	>1000mg
239	F	50	HÃ©rnia do hiato	XI Diseases of the digestive system	10.1	33	78	23	10.4	6	#N/A	12.2	40	86	25	184	20	2.1	7	8	2	173.6	14	20.7921	21.2121	10.2564	8.69565	1669.23	233.333	Yes	No	1	Yes	No	Iron Deficiency Anemia	Iron Deficiency Anemia	Success	0	Failure	1	Failure	1	0	0	1	0	0	XI Diseases of the digestive system	500-1000mg
240	F	67	DisfunÃ§Ã£o endÃ³crina	IV Endocrine, nutritional and metabolic diseases	9.7	30	75	23	4.5	6	#N/A	12.1	36	81	27	133	28	2.4	6	6	4	128.5	22	24.7423	20	8	17.3913	2855.56	366.667	Yes	No	1	Yes	No	Iron Deficiency Anemia	Iron Deficiency Anemia	Success	0	Failure	1	Success	0	0	0	0	0	1	Others	>1000mg
241	F	63	Gastrite/Ulcera	XI Diseases of the digestive system	12.1	35	82	29	6.6	13	#N/A	12.5	37	84	28	101	26	0.4	2	2	-1	94.4	13	3.30579	5.71429	2.43902	-3.44828	1430.3	100	No	No	0	Yes	No	Iron Deficiency without Anemia	Non-Iron Deficiency Anemia	Failure	1	Failure	1	Success	0	0	0	1	0	0	XI Diseases of the digestive system	500-1000mg
242	F	45	Gastrectomia	XI Diseases of the digestive system	12.4	37	94	31	31	8	#N/A	14.5	42	93	31	85	36	2.1	5	-1	0	54	28	16.9355	13.5135	-1.06383	0	174.194	350	No	No	0	Yes	No	Iron Deficiency without Anemia	Non-Iron Deficiency Anemia	Success	0	Failure	1	Success	0	0	0	1	0	0	XI Diseases of the digestive system	500-1000mg
243	F	78	Neo colon	II Neoplasms	10.5	31	88	29	16	6	#N/A	13.4	40	98	32	229	22	2.9	9	10	3	213	16	27.619	29.0323	11.3636	10.3448	1331.25	266.667	Yes	No	1	Yes	No	Iron Deficiency Anemia	Iron Deficiency Anemia	Success	0	Failure	1	Success	0	0	1	0	0	0	II Neoplasms	500-1000mg
244	F	62	Cirurgia bariatrica	XI Diseases of the digestive system	9.9	31	87	27	125	14	#N/A	14.1	43	77	25	176	23	4.2	12	-10	-2	51	9	42.4242	38.7097	-11.4943	-7.40741	40.8	64.2857	Yes	No	1	Yes	No	Iron Deficiency Anemia	Iron Deficiency Anemia	Success	0	Success	0	Success	0	0	0	1	0	0	XI Diseases of the digestive system	500-1000mg
245	F	65	Gastrite/Ulcera	XI Diseases of the digestive system	9.8	31	68	21	5	7.2	#N/A	13.7	41	80	26	63	33	3.9	10	12	5	58	25.8	39.7959	32.2581	17.6471	23.8095	1160	358.333	Yes	No	1	Yes	No	Iron Deficiency Anemia	Iron Deficiency Anemia	Success	0	Success	0	Success	0	0	0	1	0	0	XI Diseases of the digestive system	500-1000mg
246	F	73	Gastrite/Ulcera	XI Diseases of the digestive system	9.4	32	71	20	9.4	9	#N/A	12.3	37	87	28	126	21	2.9	5	16	8	116.6	12	30.8511	15.625	22.5352	40	1240.43	133.333	Yes	No	1	Yes	No	Iron Deficiency Anemia	Iron Deficiency Anemia	Success	0	Failure	1	Success	0	0	0	1	0	0	XI Diseases of the digestive system	500-1000mg
247	F	64	Neo mama	II Neoplasms	8.4	30	63	17	4	3	#N/A	14.6	43	87	29	211	21	6.2	13	24	12	207	18	73.8095	43.3333	38.0952	70.5882	5175	600	Yes	No	1	Yes	No	Iron Deficiency Anemia	Iron Deficiency Anemia	Success	0	Success	0	Success	0	0	1	0	0	0	II Neoplasms	>1000mg
248	F	74	Gastrite/Ulcera	XI Diseases of the digestive system	7	24	70	20	6.2	1	#N/A	13.1	35	95	31	97	26	6.1	11	25	11	90.8	25	87.1429	45.8333	35.7143	55	1464.52	2500	Yes	No	1	Yes	No	Iron Deficiency Anemia	Iron Deficiency Anemia	Success	0	Success	0	Success	0	0	0	1	0	0	XI Diseases of the digestive system	500-1000mg
249	F	88	Neo colon	II Neoplasms	9.7	29	96	31	59	13	#N/A	9.2	27	98	32	345	25	-0.5	-2	2	1	286	12	-5.15464	-6.89655	2.08333	3.22581	484.746	92.3077	Yes	Yes	1	Yes	No	Iron Deficiency Anemia	Iron Deficiency Anemia	Failure	1	Failure	1	Success	0	0	1	0	0	0	II Neoplasms	500-1000mg
250	F	67	SPI	VI Diseases of the nervous system	12.3	36	89	29	308	9	#N/A	12.8	37	87	30	442	21	0.5	1	-2	1	134	12	4.06504	2.77778	-2.24719	3.44828	43.5065	133.333	No	No	0	Yes	No	Iron Deficiency without Anemia	Non-Iron Deficiency Anemia	Failure	1	Failure	1	Success	0	0	0	0	0	1	Others	>1000mg
251	F	63	Neo mama	II Neoplasms	11.6	35	95	31	443	14	#N/A	13.7	40	93	31	586	36	2.1	5	-2	0	143	22	18.1034	14.2857	-2.10526	0	32.2799	157.143	Yes	No	1	Yes	No	Iron Deficiency Anemia	Iron Deficiency Anemia	Success	0	Failure	1	Success	0	0	1	0	0	0	II Neoplasms	500-1000mg
252	F	48	DHC	XI Diseases of the digestive system	13.8	40	88	30	9.5	17	#N/A	13.1	38	91	30	218	27	-0.7	-2	3	0	208.5	10	-5.07246	-5	3.40909	0	2194.74	58.8235	No	No	0	Yes	No	Iron Deficiency without Anemia	Non-Iron Deficiency Anemia	Failure	1	Failure	1	Success	0	0	0	1	0	0	XI Diseases of the digestive system	500-1000mg
253	F	68	Insuf card	IX Diseases of the circulatory system	8.6	29	65	19	1.8	2	#N/A	11.6	35	85	28	19.5	9	3	6	20	9	17.7	7	34.8837	20.6897	30.7692	47.3684	983.333	350	Yes	Yes	1	Yes	Yes	Iron Deficiency Anemia	Iron Deficiency Anemia	Success	0	Failure	1	Failure	1	0	0	0	1	0	IX Diseases of the circulatory system	500-1000mg
254	M	66	Neo snc	II Neoplasms	11.7	35	92	30	149	14	#N/A	12.4	36	94	32	785	29	0.7	1	2	2	636	15	5.98291	2.85714	2.17391	6.66667	426.846	107.143	Yes	Yes	1	Yes	No	Iron Deficiency Anemia	Iron Deficiency Anemia	Failure	1	Failure	1	Success	0	0	1	0	0	0	II Neoplasms	500-1000mg
255	F	42	DisfunÃ§Ã£o endÃ³crina	IV Endocrine, nutritional and metabolic diseases	8	30	63	16	0.6	2	#N/A	14.1	46	83	25	68	27	6.1	16	20	9	67.4	25	76.25	53.3333	31.746	56.25	11233.3	1250	Yes	No	1	Yes	No	Iron Deficiency Anemia	Iron Deficiency Anemia	Success	0	Success	0	Success	0	0	0	0	0	1	Others	500-1000mg
256	M	65	Neo mama	II Neoplasms	12.1	36	86	29	57	13	#N/A	12.8	38	90	30	682	19	0.7	2	4	1	625	6	5.78512	5.55556	4.65116	3.44828	1096.49	46.1538	Yes	Yes	1	Yes	Yes	Iron Deficiency Anemia	Iron Deficiency Anemia	Failure	1	Failure	1	Failure	1	0	1	0	0	0	II Neoplasms	500-1000mg
257	M	80	Neo hematolÃ³gica	II Neoplasms	9.6	30	77	24	15.6	6	#N/A	12.3	36	86	28	89	21	2.7	6	9	4	73.4	15	28.125	20	11.6883	16.6667	470.513	250	Yes	Yes	1	Yes	No	Iron Deficiency Anemia	Iron Deficiency Anemia	Success	0	Failure	1	Success	0	0	1	0	0	0	II Neoplasms	500-1000mg
258	F	72	Gastrite/Ulcera	XI Diseases of the digestive system	10.5	32	86	28	33	10	#N/A	11.6	36	91	29	703	31	1.1	4	5	1	670	21	10.4762	12.5	5.81395	3.57143	2030.3	210	Yes	Yes	1	Yes	No	Iron Deficiency Anemia	Iron Deficiency Anemia	Failure	1	Failure	1	Success	0	0	0	1	0	0	XI Diseases of the digestive system	>1000mg
259	F	80	IRC	XIV Diseases of the genitourinary system	10.2	34	86	25	6	8	#N/A	12.5	39	87	28	116	24	2.3	5	1	3	110	16	22.549	14.7059	1.16279	12	1833.33	200	Yes	No	1	Yes	No	Iron Deficiency Anemia	Iron Deficiency Anemia	Success	0	Failure	1	Success	0	1	0	0	0	0	XIV Diseases of the genitourinary system	>1000mg
260	M	74	Angiodisplasia	XI Diseases of the digestive system	10.1	29	86	29	30	19	#N/A	12	35	90	30	247	28	1.9	6	4	1	217	9	18.8119	20.6897	4.65116	3.44828	723.333	47.3684	Yes	Yes	1	Yes	No	Iron Deficiency Anemia	Iron Deficiency Anemia	Failure	1	Failure	1	Success	0	0	0	1	0	0	XI Diseases of the digestive system	500mg
261	F	80	Angiodisplasia	XI Diseases of the digestive system	11.9	34	92	29	68	13	#N/A	14.2	44	98	31	128	23	2.3	10	6	2	60	10	19.3277	29.4118	6.52174	6.89655	88.2353	76.9231	Yes	No	1	Yes	No	Iron Deficiency Anemia	Iron Deficiency Anemia	Success	0	Failure	1	Success	0	0	0	1	0	0	XI Diseases of the digestive system	500mg
262	F	66	Hemorragia digestiva baixa	XI Diseases of the digestive system	10.2	32	67	20	4.4	5	#N/A	14.6	42	88	30	129	26	4.4	10	21	10	124.6	21	43.1373	31.25	31.3433	50	2831.82	420	Yes	No	1	Yes	No	Iron Deficiency Anemia	Iron Deficiency Anemia	Success	0	Success	0	Success	0	0	0	1	0	0	XI Diseases of the digestive system	500-1000mg
263	F	49	Insuf card	IX Diseases of the circulatory system	8.3	28	78	23	13.4	6	#N/A	11.8	36	88	28	182	19	3.5	8	10	5	168.6	13	42.1687	28.5714	12.8205	21.7391	1258.21	216.667	Yes	Yes	1	Yes	Yes	Iron Deficiency Anemia	Iron Deficiency Anemia	Success	0	Success	0	Failure	1	0	0	0	1	0	IX Diseases of the circulatory system	500-1000mg
264	M	64	DII	XI Diseases of the digestive system	9.6	29	69	22	7.8	8	#N/A	16	47	93	31	63	38	6.4	18	24	9	55.2	30	66.6667	62.069	34.7826	40.9091	707.692	375	Yes	No	1	Yes	No	Iron Deficiency Anemia	Iron Deficiency Anemia	Success	0	Success	0	Success	0	0	0	1	0	0	XI Diseases of the digestive system	>1000mg
265	F	42	Metrorragias	XIV Diseases of the genitourinary system	10.9	34	76	24	5.9	5	#N/A	11.5	34	82	27	115	21	0.6	0	6	3	109.1	16	5.50459	0	7.89474	12.5	1849.15	320	Yes	Yes	1	Yes	No	Iron Deficiency Anemia	Iron Deficiency Anemia	Failure	1	Failure	1	Success	0	1	0	0	0	0	XIV Diseases of the genitourinary system	500-1000mg
266	M	56	DII	XI Diseases of the digestive system	8.2	31	65	17	2.1	3	#N/A	12.7	42	77	23	200	17	4.5	11	12	6	197.9	14	54.878	35.4839	18.4615	35.2941	9423.81	466.667	Yes	Yes	1	Yes	Yes	Iron Deficiency Anemia	Iron Deficiency Anemia	Success	0	Success	0	Failure	1	0	0	1	0	0	XI Diseases of the digestive system	500-1000mg
267	F	76	Insuf card	IX Diseases of the circulatory system	8	25.6	84	26	5.9	2	#N/A	11.7	36	90	29	222	33	3.7	10.4	6	3	216.1	31	46.25	40.625	7.14286	11.5385	3662.71	1550	Yes	Yes	1	Yes	No	Iron Deficiency Anemia	Iron Deficiency Anemia	Success	0	Success	0	Success	0	0	0	0	1	0	IX Diseases of the circulatory system	500-1000mg
268	F	50	Gastrectomia	XI Diseases of the digestive system	10.5	32	68	24	5	4	#N/A	13.9	43	85	27	129	70	3.4	11	17	3	124	66	32.381	34.375	25	12.5	2480	1650	Yes	No	1	Yes	No	Iron Deficiency Anemia	Iron Deficiency Anemia	Success	0	Success	0	Success	0	0	0	1	0	0	XI Diseases of the digestive system	>1000mg
269	F	85	Neo Ãºtero	II Neoplasms	9.9	30	80	26	9.6	7	#N/A	11.3	35	86	27	283	28	1.4	5	6	1	273.4	21	14.1414	16.6667	7.5	3.84615	2847.92	300	Yes	Yes	1	Yes	No	Iron Deficiency Anemia	Iron Deficiency Anemia	Failure	1	Failure	1	Success	0	0	1	0	0	0	II Neoplasms	500-1000mg
270	F	63	Neo recto	II Neoplasms	10.2	33	74	22	39	9	#N/A	11.2	35	80	25	473	21	1	2	6	3	434	12	9.80392	6.06061	8.10811	13.6364	1112.82	133.333	Yes	Yes	1	Yes	No	Iron Deficiency Anemia	Iron Deficiency Anemia	Failure	1	Failure	1	Success	0	0	1	0	0	0	II Neoplasms	500-1000mg
271	F	72	DII	XI Diseases of the digestive system	10.4	32	77	24	10.2	7	#N/A	12.4	41	81	24	239	24	2	9	4	0	228.8	17	19.2308	28.125	5.19481	0	2243.14	242.857	Yes	No	1	Yes	No	Iron Deficiency Anemia	Iron Deficiency Anemia	Failure	1	Failure	1	Success	0	0	0	1	0	0	XI Diseases of the digestive system	500-1000mg
272	F	65	Angiodisplasia	XI Diseases of the digestive system	10.4	33	77	24	13.9	5	#N/A	11.2	37	84	27	56	13	0.8	4	7	3	42.1	8	7.69231	12.1212	9.09091	12.5	302.878	160	Yes	Yes	1	Yes	Yes	Iron Deficiency Anemia	Iron Deficiency Anemia	Failure	1	Failure	1	Failure	1	0	0	1	0	0	XI Diseases of the digestive system	500-1000mg
273	F	65	Angiodisplasia	XI Diseases of the digestive system	9.7	30	85	27	19.3	7	#N/A	12.3	38	89	28	135	22	2.6	8	4	1	115.7	15	26.8041	26.6667	4.70588	3.7037	599.482	214.286	Yes	No	1	Yes	No	Iron Deficiency Anemia	Iron Deficiency Anemia	Success	0	Failure	1	Success	0	0	0	1	0	0	XI Diseases of the digestive system	500-1000mg
274	F	54	Gastrite/Ulcera	XI Diseases of the digestive system	9.9	34	71	20	48	4	#N/A	14	44	82	25	265	15	4.1	10	11	5	217	11	41.4141	29.4118	15.493	25	452.083	275	Yes	No	1	Yes	Yes	Iron Deficiency Anemia	Iron Deficiency Anemia	Success	0	Success	0	Failure	1	0	0	1	0	0	XI Diseases of the digestive system	500-1000mg
275	F	53	Metrorragias	XIV Diseases of the genitourinary system	11.2	34	74	24	5.3	6	#N/A	13.7	42	83	26	282	39	2.5	8	9	2	276.7	33	22.3214	23.5294	12.1622	8.33333	5220.75	550	Yes	No	1	Yes	No	Iron Deficiency Anemia	Iron Deficiency Anemia	Success	0	Failure	1	Success	0	1	0	0	0	0	XIV Diseases of the genitourinary system	>1000mg
276	F	57	DII	XI Diseases of the digestive system	13.2	37	87	30	352	17	#N/A	14.7	41	92	32	874	42	1.5	4	5	2	522	25	11.3636	10.8108	5.74713	6.66667	148.295	147.059	No	No	0	Yes	No	Iron Deficiency without Anemia	Non-Iron Deficiency Anemia	Failure	1	Failure	1	Success	0	0	0	1	0	0	XI Diseases of the digestive system	500-1000mg
277	F	47	D celÃ­aca	XI Diseases of the digestive system	13	37	80	28	7.4	6	#N/A	12.2	40	82	26	424	41	-0.8	3	2	-2	416.6	35	-6.15385	8.10811	2.5	-7.14286	5629.73	583.333	No	No	0	Yes	No	Iron Deficiency without Anemia	Non-Iron Deficiency Anemia	Failure	1	Failure	1	Success	0	0	0	1	0	0	XI Diseases of the digestive system	500-1000mg
278	F	54	Metrorragias	XIV Diseases of the genitourinary system	8.1	28	67	19	57	3	#N/A	12.1	37	85	27	831	30	4	9	18	8	774	27	49.3827	32.1429	26.8657	42.1053	1357.89	900	Yes	No	1	Yes	No	Iron Deficiency Anemia	Iron Deficiency Anemia	Success	0	Success	0	Success	0	1	0	0	0	0	XIV Diseases of the genitourinary system	>1000mg
279	F	71	DisfunÃ§Ã£o endÃ³crina	IV Endocrine, nutritional and metabolic diseases	10.9	35	82	25	71	8	Rush CutÃ¢neo	13.9	42	83	27	673	25	3	7	1	2	602	17	27.5229	20	1.21951	8	847.887	212.5	Yes	No	1	Yes	No	Iron Deficiency Anemia	Iron Deficiency Anemia	Success	0	Failure	1	Success	0	0	0	0	0	1	Others	500-1000mg
280	F	53	DisfunÃ§Ã£o endÃ³crina	IV Endocrine, nutritional and metabolic diseases	10.6	32	69	22	2.2	4	#N/A	13.3	41	84	27	20	15	2.7	9	15	5	17.8	11	25.4717	28.125	21.7391	22.7273	809.091	275	Yes	No	1	Yes	Yes	Iron Deficiency Anemia	Iron Deficiency Anemia	Success	0	Failure	1	Failure	1	0	0	0	0	1	Others	500-1000mg
281	F	80	DisfunÃ§Ã£o endÃ³crina	IV Endocrine, nutritional and metabolic diseases	12.8	40	91	29	61	12	#N/A	13.2	41	92	29	671	26	0.4	1	1	0	610	14	3.125	2.5	1.0989	0	1000	116.667	No	No	0	Yes	No	Iron Deficiency without Anemia	Non-Iron Deficiency Anemia	Failure	1	Failure	1	Success	0	0	0	0	0	1	Others	500mg
282	F	59	Insuf card	IX Diseases of the circulatory system	9.7	28	78	26	13	11	#N/A	11	35	85	27	229	18	1.3	7	7	1	216	7	13.4021	25	8.97436	3.84615	1661.54	63.6364	Yes	Yes	1	Yes	Yes	Iron Deficiency Anemia	Iron Deficiency Anemia	Failure	1	Failure	1	Failure	1	0	0	0	1	0	IX Diseases of the circulatory system	500-1000mg
283	M	90	Gastrite/Ulcera	XI Diseases of the digestive system	10.4	32	87	28	9	8	#N/A	12.5	38	91	29	25	17	2.1	6	4	1	16	9	20.1923	18.75	4.5977	3.57143	177.778	112.5	Yes	Yes	1	Yes	Yes	Iron Deficiency Anemia	Iron Deficiency Anemia	Success	0	Failure	1	Failure	1	0	0	1	0	0	XI Diseases of the digestive system	500mg
284	F	64	Cirurgia bariatrica	XI Diseases of the digestive system	11.8	37	88	28	8	5	#N/A	13.4	40	91	30	61	36	1.6	3	3	2	53	31	13.5593	8.10811	3.40909	7.14286	662.5	620	Yes	No	1	Yes	No	Iron Deficiency Anemia	Iron Deficiency Anemia	Failure	1	Failure	1	Success	0	0	0	1	0	0	XI Diseases of the digestive system	500-1000mg
285	F	58	Gastrite/Ulcera	XI Diseases of the digestive system	12.4	37	79	25	5.2	9	#N/A	12.5	38	82	38	237	36	0.1	1	3	13	231.8	27	0.806452	2.7027	3.79747	52	4457.69	300	No	No	0	Yes	No	Iron Deficiency without Anemia	Non-Iron Deficiency Anemia	Failure	1	Failure	1	Success	0	0	0	1	0	0	XI Diseases of the digestive system	500-1000mg
286	F	63	Gastrite/Ulcera	XI Diseases of the digestive system	9.6	31	73	22	5.7	8	Rush CutÃ¢neo	12.3	39	79	24	170	18	2.7	8	6	2	164.3	10	28.125	25.8065	8.21918	9.09091	2882.46	125	Yes	No	1	Yes	Yes	Iron Deficiency Anemia	Iron Deficiency Anemia	Success	0	Failure	1	Failure	1	0	0	1	0	0	XI Diseases of the digestive system	500-1000mg
287	F	64	DHC	XI Diseases of the digestive system	10.3	32	87	27	27	8	#N/A	12.2	37	93	30	96	20	1.9	5	6	3	69	12	18.4466	15.625	6.89655	11.1111	255.556	150	Yes	No	1	Yes	No	Iron Deficiency Anemia	Iron Deficiency Anemia	Failure	1	Failure	1	Failure	1	0	0	1	0	0	XI Diseases of the digestive system	500-1000mg
288	F	79	Insuf card	IX Diseases of the circulatory system	11.1	35	82	25	10	13	#N/A	12.3	35	85	29	165	32	1.2	0	3	4	155	19	10.8108	0	3.65854	16	1550	146.154	Yes	No	1	Yes	No	Iron Deficiency Anemia	Iron Deficiency Anemia	Failure	1	Failure	1	Success	0	0	0	0	1	0	IX Diseases of the circulatory system	500-1000mg
289	M	52	Metrorragias	XIV Diseases of the genitourinary system	9.2	30.3	64	19	1.8	4	#N/A	12	40	81	24	105	19	2.8	9.7	17	5	103.2	15	30.4348	32.0132	26.5625	26.3158	5733.33	375	Yes	Yes	1	Yes	Yes	Iron Deficiency Anemia	Iron Deficiency Anemia	Success	0	Failure	1	Failure	1	1	0	0	0	0	XIV Diseases of the genitourinary system	500-1000mg
290	M	30	DII	XI Diseases of the digestive system	12	37	83	27	8.4	3	#N/A	13.2	38	89	30	122	42	1.2	1	6	3	113.6	39	10	2.7027	7.22892	11.1111	1352.38	1300	Yes	No	1	Yes	No	Iron Deficiency Anemia	Iron Deficiency Anemia	Failure	1	Failure	1	Success	0	0	0	1	0	0	XI Diseases of the digestive system	500-1000mg
291	F	46	Metrorragias	XIV Diseases of the genitourinary system	9.1	32	55	15	6.5	4	#N/A	12.9	38	73	24	58	25	3.8	6	18	9	51.5	21	41.7582	18.75	32.7273	60	792.308	525	Yes	No	1	Yes	No	Iron Deficiency Anemia	Iron Deficiency Anemia	Success	0	Success	0	Success	0	1	0	0	0	0	XIV Diseases of the genitourinary system	500-1000mg
292	M	60	Insuf card	IX Diseases of the circulatory system	10.8	32	85	27	19.3	8	#N/A	11.8	35	91	30	348	27	1	3	6	3	328.7	19	9.25926	9.375	7.05882	11.1111	1703.11	237.5	Yes	Yes	1	Yes	No	Iron Deficiency Anemia	Iron Deficiency Anemia	Failure	1	Failure	1	Success	0	0	0	0	1	0	IX Diseases of the circulatory system	>1000mg
293	F	65	Neo colon	II Neoplasms	8.6	28	69	20	8.6	6	#N/A	12.2	37	79	26	703	23	3.6	9	10	6	694.4	17	41.8605	32.1429	14.4928	30	8074.42	283.333	Yes	No	1	Yes	No	Iron Deficiency Anemia	Iron Deficiency Anemia	Success	0	Success	0	Success	0	0	1	0	0	0	II Neoplasms	>1000mg
294	F	37	DII	XI Diseases of the digestive system	11	37	68	20	18.5	3.4	#N/A	15.2	44	83	28	121	38	4.2	7	15	8	102.5	34.6	38.1818	18.9189	22.0588	40	554.054	1017.65	Yes	No	1	Yes	No	Iron Deficiency Anemia	Iron Deficiency Anemia	Success	0	Success	0	Success	0	0	0	1	0	0	XI Diseases of the digestive system	>1000mg
295	M	42	Gastrite/Ulcera	XI Diseases of the digestive system	8.6	28	60	18	3.6	3	#N/A	13.8	43	77	25	121	32	5.2	15	17	7	117.4	29	60.4651	53.5714	28.3333	38.8889	3261.11	966.667	Yes	No	1	Yes	No	Iron Deficiency Anemia	Iron Deficiency Anemia	Success	0	Success	0	Success	0	0	0	1	0	0	XI Diseases of the digestive system	500-1000mg
296	F	73	Angiodisplasia	XI Diseases of the digestive system	10.9	34	88	27	97	9	#N/A	13	39	87	28	234	18	2.1	5	-1	1	137	9	19.2661	14.7059	-1.13636	3.7037	141.237	100	Yes	No	1	Yes	Yes	Iron Deficiency Anemia	Iron Deficiency Anemia	Success	0	Failure	1	Failure	1	0	0	1	0	0	XI Diseases of the digestive system	500-1000mg
297	M	32	Metrorragias	XIV Diseases of the genitourinary system	7.4	25	61	25	4.5	2	#N/A	14.5	42	82	28	107	11	7.1	17	21	3	102.5	9	95.9459	68	34.4262	12	2277.78	450	Yes	No	1	Yes	Yes	Iron Deficiency Anemia	Iron Deficiency Anemia	Success	0	Success	0	Failure	1	1	0	0	0	0	XIV Diseases of the genitourinary system	>1000mg
298	F	21	Metrorragias	XIV Diseases of the genitourinary system	11.5	34	78	26	4	9	#N/A	13.9	39	86	30	113	43	2.4	5	8	4	109	34	20.8696	14.7059	10.2564	15.3846	2725	377.778	Yes	No	1	Yes	No	Iron Deficiency Anemia	Iron Deficiency Anemia	Success	0	Failure	1	Success	0	1	0	0	0	0	XIV Diseases of the genitourinary system	500-1000mg
299	M	64	Artrite reumatÃ³ide	XIII Diseases of the musculoskeletal system and connective tissue	12.2	37	80	26	10	10	#N/A	13.3	38	82	28	193	28	1.1	1	2	2	183	18	9.01639	2.7027	2.5	7.69231	1830	180	Yes	No	1	Yes	No	Iron Deficiency Anemia	Iron Deficiency Anemia	Failure	1	Failure	1	Success	0	0	0	0	0	1	Others	500-1000mg
300	F	42	Gastrite/Ulcera	XI Diseases of the digestive system	13.3	40	92	30	5.4	2	Rush CutÃ¢neo	13.7	42	98	31	223	21	0.4	2	6	1	217.6	19	3.00752	5	6.52174	3.33333	4029.63	950	No	No	0	Yes	No	Iron Deficiency without Anemia	Non-Iron Deficiency Anemia	Failure	1	Failure	1	Success	0	0	0	1	0	0	XI Diseases of the digestive system	500-1000mg
301	M	46	Gastrectomia	XI Diseases of the digestive system	13.9	42	83	27	12.3	13	#N/A	14.3	44	85	27	142	32	0.4	2	2	0	129.7	19	2.8777	4.7619	2.40964	0	1054.47	146.154	No	No	0	Yes	No	Iron Deficiency without Anemia	Non-Iron Deficiency Anemia	Failure	1	Failure	1	Success	0	0	0	1	0	0	XI Diseases of the digestive system	500-1000mg
302	M	78	Insuf card	IX Diseases of the circulatory system	6.7	24	58	15	11	3	#N/A	12	37	78	25	131	18	5.3	13	20	10	120	15	79.1045	54.1667	34.4828	66.6667	1090.91	500	Yes	Yes	1	Yes	Yes	Iron Deficiency Anemia	Iron Deficiency Anemia	Success	0	Success	0	Failure	1	0	0	0	1	0	IX Diseases of the circulatory system	500-1000mg
303	F	89	Neo hematolÃ³gica	II Neoplasms	10.8	34	93	29	160	15	#N/A	11.2	34	94	31	542	28	0.4	0	1	2	382	13	3.7037	0	1.07527	6.89655	238.75	86.6667	Yes	Yes	1	Yes	No	Iron Deficiency Anemia	Iron Deficiency Anemia	Failure	1	Failure	1	Success	0	0	1	0	0	0	II Neoplasms	500-1000mg
304	F	46	Cirurgia bariatrica	XI Diseases of the digestive system	9.7	31	74	23	9.3	5	#N/A	12.5	39	87	27	148	25	2.8	8	13	4	138.7	20	28.866	25.8065	17.5676	17.3913	1491.4	400	Yes	No	1	Yes	No	Iron Deficiency Anemia	Iron Deficiency Anemia	Success	0	Failure	1	Success	0	0	0	1	0	0	XI Diseases of the digestive system	500-1000mg
305	F	79	Insuf card	IX Diseases of the circulatory system	10.4	33	84	26	142	15	#N/A	11.1	33	86	28	634	20	0.7	0	2	2	492	5	6.73077	0	2.38095	7.69231	346.479	33.3333	Yes	Yes	1	Yes	No	Iron Deficiency Anemia	Iron Deficiency Anemia	Failure	1	Failure	1	Failure	1	0	0	0	1	0	IX Diseases of the circulatory system	500-1000mg
306	M	73	Insuf card	IX Diseases of the circulatory system	8.4	27	62	19	2.2	4	#N/A	13.5	41	89	28	96.6	17	5.1	14	27	9	94.4	13	60.7143	51.8519	43.5484	47.3684	4290.91	325	Yes	No	1	Yes	Yes	Iron Deficiency Anemia	Iron Deficiency Anemia	Success	0	Success	0	Failure	1	0	0	0	1	0	IX Diseases of the circulatory system	>1000mg
307	F	71	HÃ©rnia do hiato	XI Diseases of the digestive system	9.7	30	73	23	8.3	10	#N/A	13	41	80	25	65	19	3.3	11	7	2	56.7	9	34.0206	36.6667	9.58904	8.69565	683.133	90	Yes	No	1	Yes	Yes	Iron Deficiency Anemia	Iron Deficiency Anemia	Success	0	Success	0	Failure	1	0	0	1	0	0	XI Diseases of the digestive system	500-1000mg
308	M	36	Artrite reumatÃ³ide	XIII Diseases of the musculoskeletal system and connective tissue	10.5	36	67	19	11	4	#N/A	14.1	42	86	28	50	12	3.6	6	19	9	39	8	34.2857	16.6667	28.3582	47.3684	354.545	200	Yes	No	1	Yes	Yes	Iron Deficiency Anemia	Iron Deficiency Anemia	Success	0	Success	0	Failure	1	0	0	0	0	1	Others	500-1000mg
309	F	37	Gravidez	XV Pregnancy, childbirth and the puerperium	12.5	37	87	33	13.3	22	#N/A	13	36	86	30	248	34	0.5	-1	-1	-3	234.7	12	4	-2.7027	-1.14943	-9.09091	1764.66	54.5455	No	No	0	No	No	No Iron Deficiency	Non-Iron Deficiency Anemia	Failure	1	Failure	1	Success	0	0	0	0	0	1	Others	500mg
310	M	89	HÃ©rnia do hiato	XI Diseases of the digestive system	12.4	38	88	28	139	16	#N/A	12.6	37	91	30	90	21	0.2	-1	3	2	-49	5	1.6129	-2.63158	3.40909	7.14286	-35.2518	31.25	Yes	Yes	1	Yes	No	Iron Deficiency Anemia	Iron Deficiency Anemia	Failure	1	Failure	1	Success	0	0	0	1	0	0	XI Diseases of the digestive system	500-1000mg
311	F	62	HÃ©rnia do hiato	XI Diseases of the digestive system	8.8	29	75	22	4.9	3	#N/A	12.4	39	90	28	59.9	25	3.6	10	15	6	55	22	40.9091	34.4828	20	27.2727	1122.45	733.333	Yes	No	1	Yes	No	Iron Deficiency Anemia	Iron Deficiency Anemia	Success	0	Success	0	Success	0	0	0	1	0	0	XI Diseases of the digestive system	500-1000mg
312	F	66	DHC	XI Diseases of the digestive system	9.2	33	69	19	7.4	4	#N/A	13.5	42	81	25	18.4	7	4.3	9	12	6	11	3	46.7391	27.2727	17.3913	31.5789	148.649	75	Yes	No	1	Yes	Yes	Iron Deficiency Anemia	Iron Deficiency Anemia	Success	0	Success	0	Failure	1	0	0	1	0	0	XI Diseases of the digestive system	500-1000mg
313	M	43	Metrorragias	XIV Diseases of the genitourinary system	11.9	35	78	26	7.3	4	#N/A	13.8	40	83	28	237	30	1.9	5	5	2	229.7	26	15.9664	14.2857	6.41026	7.69231	3146.58	650	Yes	No	1	Yes	No	Iron Deficiency Anemia	Iron Deficiency Anemia	Failure	1	Failure	1	Success	0	1	0	0	0	0	XIV Diseases of the genitourinary system	>1000mg
314	F	70	Insuf card	IX Diseases of the circulatory system	11.8	37	77	24	14	11	#N/A	14	43	86	28	263	30	2.2	6	9	4	249	19	18.6441	16.2162	11.6883	16.6667	1778.57	172.727	Yes	No	1	Yes	No	Iron Deficiency Anemia	Iron Deficiency Anemia	Success	0	Failure	1	Success	0	0	0	0	1	0	IX Diseases of the circulatory system	500-1000mg
315	F	48	HÃ©rnia do hiato	XI Diseases of the digestive system	8.2	27	72	21	2.9	2	#N/A	12.5	37	82	27	120	27	4.3	10	10	6	117.1	25	52.439	37.037	13.8889	28.5714	4037.93	1250	Yes	No	1	Yes	No	Iron Deficiency Anemia	Iron Deficiency Anemia	Success	0	Success	0	Success	0	0	0	1	0	0	XI Diseases of the digestive system	500-1000mg
316	F	63	Neo hematolÃ³gica	II Neoplasms	6.5	21	78	23	4.9	5	#N/A	9.1	29	85	25	89	29	2.6	8	7	2	84.1	24	40	38.0952	8.97436	8.69565	1716.33	480	Yes	Yes	1	Yes	No	Iron Deficiency Anemia	Iron Deficiency Anemia	Success	0	Failure	1	Success	0	0	1	0	0	0	II Neoplasms	>1000mg
317	F	76	Neo hematolÃ³gica	II Neoplasms	10.2	31	101	32	256	14	#N/A	12.2	38	101	38	485	16	2	7	0	6	229	2	19.6078	22.5806	0	18.75	89.4531	14.2857	Yes	No	1	Yes	Yes	Iron Deficiency Anemia	Iron Deficiency Anemia	Failure	1	Failure	1	Failure	1	0	1	0	0	0	II Neoplasms	500-1000mg
318	F	39	Artrite reumatÃ³ide	XIII Diseases of the musculoskeletal system and connective tissue	12.2	37	81	26	9.9	6	Rush CutÃ¢neo	13.3	40	82	27	267	31	1.1	3	1	1	257.1	25	9.01639	8.10811	1.23457	3.84615	2596.97	416.667	No	No	0	Yes	No	Iron Deficiency without Anemia	Non-Iron Deficiency Anemia	Failure	1	Failure	1	Success	0	0	0	0	0	1	Others	500-1000mg
319	F	51	Metrorragias	XIV Diseases of the genitourinary system	9.6	32	63	18	5.8	5	#N/A	12.6	38	72	23	155	18	3	6	9	5	149.2	13	31.25	18.75	14.2857	27.7778	2572.41	260	Yes	No	1	Yes	Yes	Iron Deficiency Anemia	Iron Deficiency Anemia	Success	0	Failure	1	Failure	1	1	0	0	0	0	XIV Diseases of the genitourinary system	>1000mg
320	M	37	Metrorragias	XIV Diseases of the genitourinary system	12.4	37	80	26	92	14	#N/A	13	37	80	28	308	23	0.6	0	0	2	216	9	4.83871	0	0	7.69231	234.783	64.2857	Yes	Yes	1	Yes	No	Iron Deficiency Anemia	Iron Deficiency Anemia	Failure	1	Failure	1	Success	0	1	0	0	0	0	XIV Diseases of the genitourinary system	500mg
321	F	68	Gastrite/Ulcera	XI Diseases of the digestive system	10.9	32	93	30	10	7	Dor abdominal	12.3	37	93	30	296	38	1.4	5	0	0	286	31	12.844	15.625	0	0	2860	442.857	Yes	No	1	Yes	No	Iron Deficiency Anemia	Iron Deficiency Anemia	Failure	1	Failure	1	Success	0	0	0	1	0	0	XI Diseases of the digestive system	500-1000mg
322	F	78	Angiodisplasia	XI Diseases of the digestive system	10.7	33.1	84.6	27.5	21.4	13	#N/A	10.9	32.4	84.1	28.3	457.1	31	0.2	-0.7	-0.5	0.8	435.7	18	1.86916	-2.1148	-0.591017	2.90909	2035.98	138.462	Yes	Yes	1	Yes	No	Iron Deficiency Anemia	Iron Deficiency Anemia	Failure	1	Failure	1	Success	0	0	0	1	0	0	XI Diseases of the digestive system	500-1000mg
323	F	42	Cirurgia bariatrica	XI Diseases of the digestive system	14	43.1	73.4	21.3	24.3	11	#N/A	14.7	46.2	80.7	25.6	145.9	23	0.7	3.1	7.3	4.3	121.6	12	5	7.19258	9.9455	20.1878	500.412	109.091	No	No	0	Yes	No	Iron Deficiency without Anemia	Non-Iron Deficiency Anemia	Failure	1	Failure	1	Success	0	0	0	1	0	0	XI Diseases of the digestive system	500-1000mg
324	F	66	DII	XI Diseases of the digestive system	13	39.2	91	30.1	228.9	17	#N/A	12.9	38.4	88.8	30	80.4	22	-0.1	-0.8	-2.2	-0.1	-148.5	5	-0.769231	-2.04082	-2.41758	-0.332226	-64.8755	29.4118	No	No	0	Yes	No	Iron Deficiency without Anemia	Non-Iron Deficiency Anemia	Failure	1	Failure	1	Success	0	0	0	1	0	0	XI Diseases of the digestive system	500-1000mg
325	F	41	Cirurgia bariatrica	XI Diseases of the digestive system	8.1	25.8	71	22.1	2.4	4	#N/A	11	32.8	81.4	27.3	110	37	2.9	7	10.4	5.2	107.6	33	35.8025	27.1318	14.6479	23.5294	4483.33	825	Yes	Yes	1	Yes	No	Iron Deficiency Anemia	Iron Deficiency Anemia	Success	0	Failure	1	Success	0	0	0	1	0	0	XI Diseases of the digestive system	500-1000mg
326	F	38	Gravidez	XV Pregnancy, childbirth and the puerperium	9.4	27.9	75.2	25.5	4.4	8	#N/A	11	31.5	81.4	28.5	518.7	25	1.6	3.6	6.2	3	514.3	17	17.0213	12.9032	8.24468	11.7647	11688.6	212.5	Yes	Yes	1	Yes	No	Iron Deficiency Anemia	Iron Deficiency Anemia	Failure	1	Failure	1	Success	0	0	0	0	0	1	Others	500-1000mg
327	F	24	Gravidez	XV Pregnancy, childbirth and the puerperium	9.5	29.7	77	24	7.2	5	#N/A	11.6	37.2	88.2	27	16.8	11	2.1	7.5	11.2	3	9.6	6	22.1053	25.2525	14.5455	12.5	133.333	120	Yes	Yes	1	Yes	Yes	Iron Deficiency Anemia	Iron Deficiency Anemia	Success	0	Failure	1	Failure	1	0	0	0	0	1	Others	500-1000mg
328	F	72	DII	XI Diseases of the digestive system	10.4	32.2	77.2	24.9	7	10.2	#N/A	12.4	41	81	24	239	24	2	8.8	3.8	-0.9	232	13.8	19.2308	27.3292	4.92228	-3.61446	3314.29	135.294	Yes	No	1	Yes	No	Iron Deficiency Anemia	Iron Deficiency Anemia	Failure	1	Failure	1	Success	0	0	0	1	0	0	XI Diseases of the digestive system	500mg
329	F	68	Neo colon	II Neoplasms	10.5	31.7	66	28	41.3	19	#N/A	10.8	33	91.2	30	213	32	0.3	1.3	25.2	2	171.7	13	2.85714	4.10095	38.1818	7.14286	415.738	68.4211	Yes	Yes	1	Yes	No	Iron Deficiency Anemia	Iron Deficiency Anemia	Failure	1	Failure	1	Success	0	0	1	0	0	0	II Neoplasms	500-1000mg
330	F	54	Anemia/ferr	III Diseases of the blood and blood-forming organs and certain disorders involving the immune mechanism	15	45.3	83.2	27.5	20.9	6	#N/A	14.4	43	87.9	29.5	236.6	25	-0.6	-2.3	4.7	2	215.7	19	-4	-5.07726	5.64904	7.27273	1032.06	316.667	No	No	0	Yes	No	Iron Deficiency without Anemia	Non-Iron Deficiency Anemia	Failure	1	Failure	1	Success	0	0	0	0	0	1	Others	500-1000mg
331	F	72	Gastrectomia	XI Diseases of the digestive system	13.5	42	94	30	13.3	19	#N/A	13.8	39.8	95	32.9	101.7	28	0.3	-2.2	1	2.9	88.4	9	2.22222	-5.2381	1.06383	9.66667	664.662	47.3684	No	No	0	Yes	No	Iron Deficiency without Anemia	Non-Iron Deficiency Anemia	Failure	1	Failure	1	Success	0	0	0	1	0	0	XI Diseases of the digestive system	500mg
332	F	71	Insuf card	IX Diseases of the circulatory system	11.5	37.1	84.1	26	16.2	12	#N/A	12.5	37.2	91.6	30.8	312	22	1	0.1	7.5	4.8	295.8	10	8.69565	0.269542	8.91795	18.4615	1825.93	83.3333	Yes	No	1	Yes	No	Iron Deficiency Anemia	Iron Deficiency Anemia	Failure	1	Failure	1	Success	0	0	0	0	1	0	IX Diseases of the circulatory system	500-1000mg
333	F	50	Metrorragias	XIV Diseases of the genitourinary system	9.7	34.3	73.6	20.8	2.5	3	#N/A	12.3	40.3	85	26	288	36	2.6	6	11.4	5.2	285.5	33	26.8041	17.4927	15.4891	25	11420	1100	Yes	No	1	Yes	No	Iron Deficiency Anemia	Iron Deficiency Anemia	Success	0	Failure	1	Success	0	1	0	0	0	0	XIV Diseases of the genitourinary system	>1000mg
334	F	50	Metrorragias	XIV Diseases of the genitourinary system	9.9	34.5	82.2	23.6	121.2	12	#N/A	12.1	35.8	73	24.6	394.3	19	2.2	1.3	-9.2	1	273.1	7	22.2222	3.76812	-11.1922	4.23729	225.33	58.3333	Yes	No	1	Yes	Yes	Iron Deficiency Anemia	Iron Deficiency Anemia	Success	0	Failure	1	Failure	1	1	0	0	0	0	XIV Diseases of the genitourinary system	500-1000mg
335	F	53	RWO	VII Diseases of the eye and adnexa	9.1	28	98	31	413	17	#N/A	11.7	36.9	98.6	31.2	375.5	19	2.6	8.9	0.6	0.2	-37.5	2	28.5714	31.7857	0.612245	0.645161	-9.0799	11.7647	Yes	Yes	1	Yes	Yes	Iron Deficiency Anemia	Iron Deficiency Anemia	Success	0	Failure	1	Failure	1	0	0	0	0	1	Others	500-1000mg
336	F	42	Metrorragias	XIV Diseases of the genitourinary system	9.1	28.5	76	24	7	3	#N/A	10.6	33	84	27	133	32	1.5	4.5	8	3	126	29	16.4835	15.7895	10.5263	12.5	1800	966.667	Yes	Yes	1	Yes	No	Iron Deficiency Anemia	Iron Deficiency Anemia	Failure	1	Failure	1	Success	0	1	0	0	0	0	XIV Diseases of the genitourinary system	500-1000mg
337	F	51	Metrorragias	XIV Diseases of the genitourinary system	10.9	32	81	27	6.8	11	#N/A	12.9	40	85	27	241	28	2	8	4	0	234.2	17	18.3486	25	4.93827	0	3444.12	154.545	Yes	No	1	Yes	No	Iron Deficiency Anemia	Iron Deficiency Anemia	Failure	1	Failure	1	Success	0	1	0	0	0	0	XIV Diseases of the genitourinary system	500-1000mg
338	F	82	Neo colon	II Neoplasms	12.3	36.8	89.5	29.8	38.1	14	#N/A	13.3	39.9	94	31	296	28	1	3.1	4.5	1.2	257.9	14	8.13008	8.42391	5.02793	4.02685	676.903	100	No	No	0	Yes	No	Iron Deficiency without Anemia	Non-Iron Deficiency Anemia	Failure	1	Failure	1	Success	0	0	1	0	0	0	II Neoplasms	500-1000mg
339	F	43	Metrorragias	XIV Diseases of the genitourinary system	9.9	31.5	66.7	31.4	7.1	4	#N/A	11.6	37.7	73.7	28.8	241	25	1.7	6.2	7	-2.6	233.9	21	17.1717	19.6825	10.4948	-8.28025	3294.37	525	Yes	Yes	1	Yes	No	Iron Deficiency Anemia	Iron Deficiency Anemia	Failure	1	Failure	1	Success	0	1	0	0	0	0	XIV Diseases of the genitourinary system	500-1000mg
340	F	77	DHC	XI Diseases of the digestive system	8.7	27	95	30	49.6	13	#N/A	9.8	29.3	100.7	33.8	460.8	90	1.1	2.3	5.7	3.8	411.2	77	12.6437	8.51852	6	12.6667	829.032	592.308	Yes	Yes	1	Yes	No	Iron Deficiency Anemia	Iron Deficiency Anemia	Failure	1	Failure	1	Success	0	0	0	1	0	0	XI Diseases of the digestive system	500-1000mg
341	F	74	Gastrectomia	XI Diseases of the digestive system	10.2	33	82.7	25.5	15.4	6	#N/A	12	37.2	92.1	29.7	251.5	19	1.8	4.2	9.4	4.2	236.1	13	17.6471	12.7273	11.3664	16.4706	1533.12	216.667	Yes	Yes	1	Yes	Yes	Iron Deficiency Anemia	Iron Deficiency Anemia	Failure	1	Failure	1	Failure	1	0	0	1	0	0	XI Diseases of the digestive system	500-1000mg
342	F	83	DII	XI Diseases of the digestive system	10.1	31.4	79.1	25.4	6.5	11	#N/A	12.7	39.5	86	27	322.9	7	2.6	8.1	6.9	1.6	316.4	-4	25.7426	25.7962	8.72314	6.29921	4867.69	-36.3636	Yes	No	1	Yes	Yes	Iron Deficiency Anemia	Iron Deficiency Anemia	Success	0	Failure	1	Failure	1	0	0	1	0	0	XI Diseases of the digestive system	500-1000mg
343	F	67	Neo mama	II Neoplasms	10.1	32	78	24	21	9	#N/A	11.4	35	82	26	556	23	1.3	3	4	2	535	14	12.8713	9.375	5.12821	8.33333	2547.62	155.556	Yes	Yes	1	Yes	No	Iron Deficiency Anemia	Iron Deficiency Anemia	Failure	1	Failure	1	Success	0	0	1	0	0	0	II Neoplasms	500-1000mg
344	F	79	Angiodisplasia	XI Diseases of the digestive system	9.6	29.2	83.6	27.6	7.6	8	#N/A	10.9	32.4	89	30	125.8	28	1.3	3.2	5.4	2.4	118.2	20	13.5417	10.9589	6.45933	8.69565	1555.26	250	Yes	Yes	1	Yes	No	Iron Deficiency Anemia	Iron Deficiency Anemia	Failure	1	Failure	1	Success	0	0	0	1	0	0	XI Diseases of the digestive system	500-1000mg
345	F	44	Metrorragias	XIV Diseases of the genitourinary system	13.4	42	87	27	13	11	#N/A	15.2	44.6	86	29	155.9	28	1.8	2.6	-1	2	142.9	17	13.4328	6.19048	-1.14943	7.40741	1099.23	154.545	No	No	0	Yes	No	Iron Deficiency without Anemia	Non-Iron Deficiency Anemia	Failure	1	Failure	1	Success	0	1	0	0	0	0	XIV Diseases of the genitourinary system	500-1000mg
346	F	80	Hemorragia digestiva baixa	XI Diseases of the digestive system	12.9	40.4	89.5	27	9.8	13	#N/A	15.3	49	95	29	202	43	2.4	8.6	5.5	2	192.2	30	18.6047	21.2871	6.14525	7.40741	1961.22	230.769	No	No	0	Yes	No	Iron Deficiency without Anemia	Non-Iron Deficiency Anemia	Success	0	Failure	1	Success	0	0	0	1	0	0	XI Diseases of the digestive system	500-1000mg
347	F	81	Gastrite/Ulcera	XI Diseases of the digestive system	10.7	31.9	89.4	30	384	14	#N/A	10.6	32	91	29	505	12	-0.1	0.1	1.6	-1	121	-2	-0.934579	0.31348	1.78971	-3.33333	31.5104	-14.2857	Yes	Yes	1	Yes	Yes	Iron Deficiency Anemia	Iron Deficiency Anemia	Failure	1	Failure	1	Failure	1	0	0	1	0	0	XI Diseases of the digestive system	500mg
348	F	82	Angiodisplasia	XI Diseases of the digestive system	9.5	28.9	85	28	326	12	#N/A	10.5	31.8	92	30	49.7	19	1	2.9	7	2	-276.3	7	10.5263	10.0346	8.23529	7.14286	-84.7546	58.3333	Yes	Yes	1	Yes	Yes	Iron Deficiency Anemia	Iron Deficiency Anemia	Failure	1	Failure	1	Failure	1	0	0	1	0	0	XI Diseases of the digestive system	500-1000mg
349	F	50	Metrorragias	XIV Diseases of the genitourinary system	13.6	40.2	85.9	29.1	31.3	12	#N/A	13.4	40.3	89	29	334.5	26	-0.2	0.1	3.1	-0.1	303.2	14	-1.47059	0.248756	3.60885	-0.343643	968.69	116.667	No	No	0	Yes	No	Iron Deficiency without Anemia	Non-Iron Deficiency Anemia	Failure	1	Failure	1	Success	0	1	0	0	0	0	XIV Diseases of the genitourinary system	500-1000mg
350	F	63	Anemia/ferr	III Diseases of the blood and blood-forming organs and certain disorders involving the immune mechanism	12.1	37.2	77	25	7.8	18	#N/A	14.2	42.4	84	28	104.5	36	2.1	5.2	7	3	96.7	18	17.3554	13.9785	9.09091	12	1239.74	100	No	No	0	Yes	No	Iron Deficiency without Anemia	Non-Iron Deficiency Anemia	Success	0	Failure	1	Success	0	0	0	0	0	1	Others	500mg
351	F	85	Hemorragia digestiva baixa	XI Diseases of the digestive system	11.5	35.1	90.9	29.7	308	18	#N/A	11.6	34	89.4	30.5	427	35	0.1	-1.1	-1.5	0.8	119	17	0.869565	-3.1339	-1.65017	2.6936	38.6364	94.4444	Yes	Yes	1	Yes	No	Iron Deficiency Anemia	Iron Deficiency Anemia	Failure	1	Failure	1	Success	0	0	0	1	0	0	XI Diseases of the digestive system	500-1000mg
352	F	62	CBP	XI Diseases of the digestive system	10.6	33.4	74.9	23.9	10.5	9	#N/A	12	36	82	26	466	43	1.4	2.6	7.1	2.1	455.5	34	13.2075	7.78443	9.47931	8.78661	4338.1	377.778	Yes	Yes	1	Yes	No	Iron Deficiency Anemia	Iron Deficiency Anemia	Failure	1	Failure	1	Success	0	0	0	1	0	0	XI Diseases of the digestive system	>1000mg
353	F	49	Metrorragias	XIV Diseases of the genitourinary system	10.5	32.7	73.8	23.7	5.7	9	#N/A	12.6	39.7	83.8	26.5	86.8	18	2.1	7	10	2.8	81.1	9	20	21.4067	13.5501	11.8143	1422.81	100	Yes	No	1	Yes	Yes	Iron Deficiency Anemia	Iron Deficiency Anemia	Success	0	Failure	1	Failure	1	1	0	0	0	0	XIV Diseases of the genitourinary system	>1000mg
354	F	93	Neo gÃ¡strico	II Neoplasms	9.4	30.3	84	26	52.3	9	#N/A	10	30.7	89	29	501.9	23	0.6	0.4	5	3	449.6	14	6.38298	1.32013	5.95238	11.5385	859.656	155.556	Yes	Yes	1	Yes	No	Iron Deficiency Anemia	Iron Deficiency Anemia	Failure	1	Failure	1	Success	0	0	1	0	0	0	II Neoplasms	500-1000mg
355	F	38	Gastrite/Ulcera	XI Diseases of the digestive system	13.3	39.4	82	28	10.9	15	#N/A	14.2	42	87.1	29.2	155.5	36	0.9	2.6	5.1	1.2	144.6	21	6.76692	6.59898	6.21951	4.28571	1326.61	140	No	No	0	Yes	No	Iron Deficiency without Anemia	Non-Iron Deficiency Anemia	Failure	1	Failure	1	Success	0	0	0	1	0	0	XI Diseases of the digestive system	500-1000mg
356	F	52	Metrorragias	XIV Diseases of the genitourinary system	13.7	40.1	90.2	30.9	19.2	11	#N/A	13.3	39.5	96	32.4	211.1	28	-0.4	-0.6	5.8	1.5	191.9	17	-2.91971	-1.49626	6.43016	4.85437	999.479	154.545	No	No	0	Yes	No	Iron Deficiency without Anemia	Non-Iron Deficiency Anemia	Failure	1	Failure	1	Success	0	1	0	0	0	0	XIV Diseases of the genitourinary system	>1000mg
357	F	76	Angiodisplasia	XI Diseases of the digestive system	10.7	33	92	29	12.3	9	#N/A	13.4	42	90	28	32.8	19	2.7	9	-2	-1	20.5	10	25.2336	27.2727	-2.17391	-3.44828	166.667	111.111	Yes	No	1	Yes	Yes	Iron Deficiency Anemia	Iron Deficiency Anemia	Success	0	Failure	1	Failure	1	0	0	1	0	0	XI Diseases of the digestive system	500-1000mg
358	M	92	MÃ¡ nutriÃ§Ã£o	IV Endocrine, nutritional and metabolic diseases	8.2	28	65	19	12	4	#N/A	11.1	36	76	23	116	20	2.9	8	11	4	104	16	35.3659	28.5714	16.9231	21.0526	866.667	400	Yes	Yes	1	Yes	No	Iron Deficiency Anemia	Iron Deficiency Anemia	Success	0	Failure	1	Failure	1	0	0	0	0	1	Others	500-1000mg
359	F	72	Gastrite/Ulcera	XI Diseases of the digestive system	13.3	41	87	27	260.8	15	#N/A	13.4	39	84	29	491.2	24	0.1	-2	-3	2	230.4	9	0.75188	-4.87805	-3.44828	7.40741	88.3436	60	No	No	0	Yes	No	Iron Deficiency without Anemia	Non-Iron Deficiency Anemia	Failure	1	Failure	1	Success	0	0	0	1	0	0	XI Diseases of the digestive system	500mg
360	F	30	RWO	VII Diseases of the eye and adnexa	9.9	30.2	83.4	27.4	6	3.5	#N/A	12	36.6	92.7	30.4	70.5	16	2.1	6.4	9.3	3	64.5	12.5	21.2121	21.1921	11.1511	10.9489	1075	357.143	Yes	Yes	1	Yes	Yes	Iron Deficiency Anemia	Iron Deficiency Anemia	Success	0	Failure	1	Failure	1	0	0	0	0	1	Others	500-1000mg
361	F	60	Cirurgia bariatrica	XI Diseases of the digestive system	8.8	29	74	22	6.9	4	#N/A	10.8	36	86	26	435	35	2	7	12	4	428.1	31	22.7273	24.1379	16.2162	18.1818	6204.35	775	Yes	Yes	1	Yes	No	Iron Deficiency Anemia	Iron Deficiency Anemia	Failure	1	Failure	1	Success	0	0	0	1	0	0	XI Diseases of the digestive system	>1000mg
362	F	88	Neo hematolÃ³gica	II Neoplasms	9.9	29.9	88	29	64.7	14	#N/A	11.5	35.4	97.9	32.1	312.9	28	1.6	5.5	9.9	3.1	248.2	14	16.1616	18.3946	11.25	10.6897	383.617	100	Yes	Yes	1	Yes	No	Iron Deficiency Anemia	Iron Deficiency Anemia	Failure	1	Failure	1	Success	0	0	1	0	0	0	II Neoplasms	500-1000mg
363	F	36	Metrorragias	XIV Diseases of the genitourinary system	10.2	31.3	78.8	25.7	0.6	4	#N/A	12.4	38	82	26.8	110.7	15	2.2	6.7	3.2	1.1	110.1	11	21.5686	21.4058	4.06091	4.28016	18350	275	Yes	No	1	Yes	Yes	Iron Deficiency Anemia	Iron Deficiency Anemia	Success	0	Failure	1	Failure	1	1	0	0	0	0	XIV Diseases of the genitourinary system	500mg
364	M	86	Neo hematolÃ³gica	II Neoplasms	11.8	36.7	87.5	28.2	16.1	14	#N/A	12.3	37.2	88.6	29.4	420	35	0.5	0.5	1.1	1.2	403.9	21	4.23729	1.3624	1.25714	4.25532	2508.7	150	Yes	Yes	1	Yes	No	Iron Deficiency Anemia	Iron Deficiency Anemia	Failure	1	Failure	1	Success	0	0	1	0	0	0	II Neoplasms	500-1000mg
365	F	34	DPOC	X Diseases of the respiratory system	11.5	34.7	81	26	120	17	#N/A	11.1	33.9	85.7	28	165	21	-0.4	-0.8	4.7	2	45	4	-3.47826	-2.30548	5.80247	7.69231	37.5	23.5294	Yes	Yes	1	Yes	No	Iron Deficiency Anemia	Iron Deficiency Anemia	Failure	1	Failure	1	Success	0	0	0	0	0	1	Others	500-1000mg
366	F	82	Anemia/ferr	III Diseases of the blood and blood-forming organs and certain disorders involving the immune mechanism	11.8	35	92	30	7.4	7	#N/A	14.4	44	92	29	225	21	2.6	9	0	-1	217.6	14	22.0339	25.7143	0	-3.33333	2940.54	200	Yes	No	1	Yes	No	Iron Deficiency Anemia	Iron Deficiency Anemia	Success	0	Failure	1	Success	0	0	0	0	0	1	Others	>1000mg
367	F	76	HÃ©rnia do hiato	XI Diseases of the digestive system	13.7	43.7	78.5	24.7	23.9	13	#N/A	14.7	45.9	82	26	392	38	1	2.2	3.5	1.3	368.1	25	7.29927	5.03432	4.4586	5.26316	1540.17	192.308	No	No	0	Yes	No	Iron Deficiency without Anemia	Non-Iron Deficiency Anemia	Failure	1	Failure	1	Success	0	0	0	1	0	0	XI Diseases of the digestive system	>1000mg
368	F	61	Hemorragia digestiva baixa	XI Diseases of the digestive system	14.5	43.9	87.6	29.1	27.8	20	#N/A	16	48.5	29.8	33	40.3	26	1.5	4.6	-57.8	3.9	12.5	6	10.3448	10.4784	-65.9817	13.4021	44.964	30	No	No	0	No	No	No Iron Deficiency	Non-Iron Deficiency Anemia	Failure	1	Failure	1	Success	0	0	0	1	0	0	XI Diseases of the digestive system	500mg
369	M	46	Metrorragias	XIV Diseases of the genitourinary system	11.1	34	75	24	3.9	13	#N/A	12.8	39	81	26	110	52	1.7	5	6	2	106.1	39	15.3153	14.7059	8	8.33333	2720.51	300	Yes	Yes	1	Yes	No	Iron Deficiency Anemia	Iron Deficiency Anemia	Failure	1	Failure	1	Success	0	1	0	0	0	0	XIV Diseases of the genitourinary system	500-1000mg
370	M	32	DII	XI Diseases of the digestive system	12.1	36.5	75.4	25.1	8.9	17	#N/A	14.6	43.6	81.3	27.2	164.6	25	2.5	7.1	5.9	2.1	155.7	8	20.6612	19.4521	7.82493	8.36653	1749.44	47.0588	Yes	No	1	Yes	No	Iron Deficiency Anemia	Iron Deficiency Anemia	Success	0	Failure	1	Success	0	0	0	1	0	0	XI Diseases of the digestive system	500-1000mg
371	M	47	Metrorragias	XIV Diseases of the genitourinary system	9.6	29.9	71	22.8	3.9	3	#N/A	12.6	39.8	78.9	25.1	153	18	3	9.9	7.9	2.3	149.1	15	31.25	33.1104	11.1268	10.0877	3823.08	500	Yes	Yes	1	Yes	Yes	Iron Deficiency Anemia	Iron Deficiency Anemia	Success	0	Failure	1	Failure	1	1	0	0	0	0	XIV Diseases of the genitourinary system	500-1000mg
372	F	41	Metrorragias	XIV Diseases of the genitourinary system	11.4	40	70	20	101	17	#N/A	12.6	44.1	76.6	21.8	601.9	51	1.2	4.1	6.6	1.8	500.9	34	10.5263	10.25	9.42857	9	495.941	200	Yes	No	1	Yes	No	Iron Deficiency Anemia	Iron Deficiency Anemia	Failure	1	Failure	1	Success	0	1	0	0	0	0	XIV Diseases of the genitourinary system	500-1000mg
373	F	64	DHC	XI Diseases of the digestive system	11.2	35	75	23	10.7	7	#N/A	13.3	40.9	84.8	27.6	42.3	18	2.1	5.9	9.8	4.6	31.6	11	18.75	16.8571	13.0667	20	295.327	157.143	Yes	No	1	Yes	Yes	Iron Deficiency Anemia	Iron Deficiency Anemia	Success	0	Failure	1	Failure	1	0	0	1	0	0	XI Diseases of the digestive system	500-1000mg
374	F	72	Perda hemÃ¡tica	XV Pregnancy, childbirth and the puerperium	8.7	30	62	17	4.5	2	#N/A	11.7	39	70	20	220	16	3	9	8	3	215.5	14	34.4828	30	12.9032	17.6471	4788.89	700	Yes	Yes	1	Yes	Yes	Iron Deficiency Anemia	Iron Deficiency Anemia	Success	0	Failure	1	Failure	1	0	0	0	0	1	Others	500-1000mg
375	F	79	Gastrite/Ulcera	XI Diseases of the digestive system	12.2	36.1	91	30.7	20.6	17	#N/A	12.2	34.2	89.3	31.8	401	34	0	-1.9	-1.7	1.1	380.4	17	0	-5.26316	-1.86813	3.58306	1846.6	100	No	No	0	Yes	No	Iron Deficiency without Anemia	Non-Iron Deficiency Anemia	Failure	1	Failure	1	Success	0	0	0	1	0	0	XI Diseases of the digestive system	500-1000mg
376	F	65	Anemia/ferr	III Diseases of the blood and blood-forming organs and certain disorders involving the immune mechanism	11.6	36	88	27	54.6	15	#N/A	12.8	38	87	28	298	25	1.2	2	-1	1	243.4	10	10.3448	5.55556	-1.13636	3.7037	445.788	66.6667	Yes	No	1	Yes	No	Iron Deficiency Anemia	Iron Deficiency Anemia	Failure	1	Failure	1	Success	0	0	0	0	0	1	Others	500-1000mg
377	M	87	Gastrectomia	XI Diseases of the digestive system	11.3	35	87	27	7.4	7	#N/A	13.9	42	92	30	137	29	2.6	7	5	3	129.6	22	23.0088	20	5.74713	11.1111	1751.35	314.286	Yes	No	1	Yes	No	Iron Deficiency Anemia	Iron Deficiency Anemia	Success	0	Failure	1	Success	0	0	0	1	0	0	XI Diseases of the digestive system	500-1000mg
378	F	45	DII	XI Diseases of the digestive system	12.4	35.6	80.8	28	10.5	11	#N/A	13.1	38.9	88.2	29	709.1	57	0.7	3.3	7.4	1	698.6	46	5.64516	9.26966	9.15842	3.57143	6653.33	418.182	No	No	0	Yes	No	Iron Deficiency without Anemia	Non-Iron Deficiency Anemia	Failure	1	Failure	1	Success	0	0	0	1	0	0	XI Diseases of the digestive system	500-1000mg
379	F	43	Drepanocitose	III Diseases of the blood and blood-forming organs and certain disorders involving the immune mechanism	11.8	35	70	23	6.4	6	#N/A	12.9	40.1	77.4	24.9	86.3	18	1.1	5.1	7.4	1.9	79.9	12	9.32203	14.5714	10.5714	8.26087	1248.44	200	Yes	No	1	Yes	Yes	Iron Deficiency Anemia	Iron Deficiency Anemia	Failure	1	Failure	1	Failure	1	0	0	0	0	1	Others	500-1000mg
380	F	38	Metrorragias	XIV Diseases of the genitourinary system	7.4	25.9	59.2	17	4	2	#N/A	13.7	42.9	82.8	26.4	50.1	27	6.3	17	23.6	9.4	46.1	25	85.1351	65.6371	39.8649	55.2941	1152.5	1250	Yes	No	1	Yes	No	Iron Deficiency Anemia	Iron Deficiency Anemia	Success	0	Success	0	Success	0	1	0	0	0	0	XIV Diseases of the genitourinary system	>1000mg
381	F	77	Neo colon	II Neoplasms	10	31	79	25	12.3	9	#N/A	12	37	85	27	421	14	2	6	6	2	408.7	5	20	19.3548	7.59494	8	3322.76	55.5556	Yes	Yes	1	Yes	Yes	Iron Deficiency Anemia	Iron Deficiency Anemia	Failure	1	Failure	1	Failure	1	0	1	0	0	0	II Neoplasms	>1000mg
382	F	92	Angiodisplasia	XI Diseases of the digestive system	9	28.7	73.4	23	9	6	#N/A	11.7	36	81	26	148	18	2.7	7.3	7.6	3	139	12	30	25.4355	10.3542	13.0435	1544.44	200	Yes	Yes	1	Yes	Yes	Iron Deficiency Anemia	Iron Deficiency Anemia	Success	0	Failure	1	Failure	1	0	0	1	0	0	XI Diseases of the digestive system	500-1000mg
383	F	43	Gastrectomia	XI Diseases of the digestive system	10.5	32.2	93.9	30.8	6.8	19	#N/A	11.5	35	94	30	134	36	1	2.8	0.1	-0.8	127.2	17	9.52381	8.69565	0.106496	-2.5974	1870.59	89.4737	Yes	Yes	1	Yes	No	Iron Deficiency Anemia	Iron Deficiency Anemia	Failure	1	Failure	1	Success	0	0	0	1	0	0	XI Diseases of the digestive system	500-1000mg
384	F	52	LES	XIII Diseases of the musculoskeletal system and connective tissue	11.5	34.9	94.7	31.63	13.2	8	#N/A	12.3	36.5	93.6	31.5	183	39	0.8	1.6	-1.1	-0.13	169.8	31	6.95652	4.58453	-1.16156	-0.411002	1286.36	387.5	Yes	No	1	Yes	No	Iron Deficiency Anemia	Iron Deficiency Anemia	Failure	1	Failure	1	Success	0	0	0	0	0	1	Others	500-1000mg
385	M	76	Gastrite/Ulcera	XI Diseases of the digestive system	11.5	34	83	27	321	17	#N/A	13	39	87	28	667	31	1.5	5	4	1	346	14	13.0435	14.7059	4.81928	3.7037	107.788	82.3529	Yes	Yes	1	Yes	No	Iron Deficiency Anemia	Iron Deficiency Anemia	Failure	1	Failure	1	Success	0	0	0	1	0	0	XI Diseases of the digestive system	500-1000mg
386	F	42	Anemia/ferr	III Diseases of the blood and blood-forming organs and certain disorders involving the immune mechanism	11	36.9	70	20.9	5.2	15	#N/A	14.9	45.9	83.3	27.1	48.2	25	3.9	9	13.3	6.2	43	10	35.4545	24.3902	19	29.6651	826.923	66.6667	Yes	No	1	Yes	No	Iron Deficiency Anemia	Iron Deficiency Anemia	Success	0	Success	0	Success	0	0	0	0	0	1	Others	500-1000mg
387	F	71	DII	XI Diseases of the digestive system	10.4	32.3	77.2	24.9	7	10.2	#N/A	12.4	41	81	24	239	24	2	8.7	3.8	-0.9	232	13.8	19.2308	26.935	4.92228	-3.61446	3314.29	135.294	Yes	No	1	Yes	No	Iron Deficiency Anemia	Iron Deficiency Anemia	Failure	1	Failure	1	Success	0	0	0	1	0	0	XI Diseases of the digestive system	500-1000mg
388	F	59	Cirurgia bariatrica	XI Diseases of the digestive system	12.6	38	91	30	10.3	8	#N/A	13.3	38	91	31	257	35	0.7	0	0	1	246.7	27	5.55556	0	0	3.33333	2395.15	337.5	No	No	0	Yes	No	Iron Deficiency without Anemia	Non-Iron Deficiency Anemia	Failure	1	Failure	1	Success	0	0	0	1	0	0	XI Diseases of the digestive system	>1000mg
389	M	55	Neo gÃ¡strico	II Neoplasms	15.6	46	90	30	14	22	#N/A	15	44.5	89.9	30.3	66	23	-0.6	-1.5	-0.1	0.3	52	1	-3.84615	-3.26087	-0.111111	1	371.429	4.54545	No	No	0	No	No	No Iron Deficiency	Non-Iron Deficiency Anemia	Failure	1	Failure	1	Success	0	0	1	0	0	0	II Neoplasms	500mg
390	F	80	DHC	XI Diseases of the digestive system	12	33.7	92.2	32.9	14.4	12	#N/A	12.3	36	95	32	504	30	0.3	2.3	2.8	-0.9	489.6	18	2.5	6.82493	3.03688	-2.73556	3400	150	Yes	No	1	Yes	No	Iron Deficiency Anemia	Iron Deficiency Anemia	Failure	1	Failure	1	Success	0	0	0	1	0	0	XI Diseases of the digestive system	500-1000mg
391	F	57	Neo esÃ³fago	II Neoplasms	10.9	31	82	29	10.6	12	#N/A	12.2	35.9	90	30	107.6	27	1.3	4.9	8	1	97	15	11.9266	15.8065	9.7561	3.44828	915.094	125	Yes	No	1	Yes	No	Iron Deficiency Anemia	Iron Deficiency Anemia	Failure	1	Failure	1	Success	0	0	1	0	0	0	II Neoplasms	500-1000mg
392	F	34	DII	XI Diseases of the digestive system	11.7	36.2	109.3	35.3	143.7	28	#N/A	11.9	36.6	106	34.3	245.2	46	0.2	0.4	-3.3	-1	101.5	18	1.7094	1.10497	-3.01921	-2.83286	70.6333	64.2857	Yes	Yes	1	No	No	No Iron Deficiency	Non-Iron Deficiency Anemia	Failure	1	Failure	1	Success	0	0	0	1	0	0	XI Diseases of the digestive system	500-1000mg
393	M	40	DII	XI Diseases of the digestive system	13	39	83	27	29.5	15	#N/A	13.9	43.4	88.3	28.3	184.4	20	0.9	4.4	5.3	1.3	154.9	5	6.92308	11.2821	6.38554	4.81481	525.085	33.3333	Yes	No	1	Yes	No	Iron Deficiency Anemia	Iron Deficiency Anemia	Failure	1	Failure	1	Failure	1	0	0	1	0	0	XI Diseases of the digestive system	500-1000mg
394	F	28	Metrorragias	XIV Diseases of the genitourinary system	9.1	31.9	63.7	18.1	4.3	1	#N/A	13.1	40.8	81.8	26.1	84	32	4	8.9	18.1	8	79.7	31	43.956	27.8997	28.4144	44.1989	1853.49	3100	Yes	No	1	Yes	No	Iron Deficiency Anemia	Iron Deficiency Anemia	Success	0	Success	0	Success	0	1	0	0	0	0	XIV Diseases of the genitourinary system	500-1000mg
395	F	39	Espondilite anquilosante	XIII Diseases of the musculoskeletal system and connective tissue	10.3	32.3	80.3	25.8	411	2	#N/A	12.3	38.4	87.9	28.1	104.3	34	2	6.1	7.6	2.3	-306.7	32	19.4175	18.8854	9.46451	8.91473	-74.6229	1600	Yes	No	1	Yes	No	Iron Deficiency Anemia	Iron Deficiency Anemia	Failure	1	Failure	1	Success	0	0	0	0	0	1	Others	500-1000mg
396	F	45	DPOC	X Diseases of the respiratory system	11.2	35.5	94.5	29.8	27.9	8	#N/A	13.2	42	97	30	425	20	2	6.5	2.5	0.2	397.1	12	17.8571	18.3099	2.6455	0.671141	1423.3	150	Yes	No	1	Yes	No	Iron Deficiency Anemia	Iron Deficiency Anemia	Failure	1	Failure	1	Failure	1	0	0	0	0	1	Others	500-1000mg
397	F	73	Neo ileon	II Neoplasms	14.5	41	91	31	76	15	#N/A	15	42	93	32	507	32	0.5	1	2	1	431	17	3.44828	2.43902	2.1978	3.22581	567.105	113.333	No	No	0	Yes	No	Iron Deficiency without Anemia	Non-Iron Deficiency Anemia	Failure	1	Failure	1	Success	0	0	1	0	0	0	II Neoplasms	500-1000mg
398	F	81	Angiodisplasia	XI Diseases of the digestive system	9.3	29.6	79.7	24.5	16.2	5	#N/A	11.6	36.2	84	27	918	24	2.3	6.6	4.3	2.5	901.8	19	24.7312	22.2973	5.39523	10.2041	5566.67	380	Yes	Yes	1	Yes	No	Iron Deficiency Anemia	Iron Deficiency Anemia	Success	0	Failure	1	Success	0	0	0	1	0	0	XI Diseases of the digestive system	500-1000mg
399	M	74	Neo gÃ¡strico	II Neoplasms	10.1	32.3	87.7	27.4	10.2	12	#N/A	10.1	30	89	29	610	38	0	-2.3	1.3	1.6	599.8	26	0	-7.12074	1.48233	5.83942	5880.39	216.667	Yes	Yes	1	Yes	No	Iron Deficiency Anemia	Iron Deficiency Anemia	Failure	1	Failure	1	Success	0	0	1	0	0	0	II Neoplasms	>1000mg
400	F	52	Anemia/ferr	III Diseases of the blood and blood-forming organs and certain disorders involving the immune mechanism	12.4	37.6	85.7	28.2	512	13	#N/A	13.1	40	90	29	845	25	0.7	2.4	4.3	0.8	333	12	5.64516	6.38298	5.0175	2.83688	65.0391	92.3077	No	No	0	Yes	No	Iron Deficiency without Anemia	Non-Iron Deficiency Anemia	Failure	1	Failure	1	Success	0	0	0	0	0	1	Others	500-1000mg
401	M	92	Insuf card	IX Diseases of the circulatory system	9.4	31.1	77.4	23.4	11.7	6	#N/A	10.6	34	81	25	133	14	1.2	2.9	3.6	1.6	121.3	8	12.766	9.32476	4.65116	6.83761	1036.75	133.333	Yes	Yes	1	Yes	Yes	Iron Deficiency Anemia	Iron Deficiency Anemia	Failure	1	Failure	1	Failure	1	0	0	0	1	0	IX Diseases of the circulatory system	500mg
402	M	29	DII	XI Diseases of the digestive system	11.2	34	88	28	5.4	4	#N/A	11.7	34.8	92.5	31	70.1	37	0.5	0.8	4.5	3	64.7	33	4.46429	2.35294	5.11364	10.7143	1198.15	825	Yes	Yes	1	Yes	No	Iron Deficiency Anemia	Iron Deficiency Anemia	Failure	1	Failure	1	Success	0	0	0	1	0	0	XI Diseases of the digestive system	500-1000mg
403	F	53	Neo recto	II Neoplasms	13.1	38.3	87	30	21.1	17	#N/A	13.4	40	96.6	32.4	50.6	35	0.3	1.7	9.6	2.4	29.5	18	2.29008	4.43864	11.0345	8	139.81	105.882	No	No	0	Yes	No	Iron Deficiency without Anemia	Non-Iron Deficiency Anemia	Failure	1	Failure	1	Success	0	0	1	0	0	0	II Neoplasms	500mg
404	F	60	Angiodisplasia	XI Diseases of the digestive system	13.2	40	84	27	12.7	31	#N/A	13.2	40	86	28	19.2	34	0	0	2	1	6.5	3	0	0	2.38095	3.7037	51.1811	9.67742	No	No	0	No	No	No Iron Deficiency	Non-Iron Deficiency Anemia	Failure	1	Failure	1	Success	0	0	0	1	0	0	XI Diseases of the digestive system	500mg
405	F	85	Insuf card	IX Diseases of the circulatory system	12.7	38.5	94.5	31.3	357	14	#N/A	13.1	39.4	90.1	29.9	790.5	19	0.4	0.9	-4.4	-1.4	433.5	5	3.14961	2.33766	-4.65608	-4.47284	121.429	35.7143	No	No	0	Yes	Yes	Iron Deficiency without Anemia	Non-Iron Deficiency Anemia	Failure	1	Failure	1	Failure	1	0	0	0	1	0	IX Diseases of the circulatory system	500-1000mg
406	F	48	Gastrectomia	XI Diseases of the digestive system	15.3	43.7	86.9	30.3	135.1	15	#N/A	15.5	47.4	91.3	29.8	550.2	42	0.2	3.7	4.4	-0.5	415.1	27	1.30719	8.46682	5.06329	-1.65017	307.254	180	No	No	0	Yes	No	Iron Deficiency without Anemia	Non-Iron Deficiency Anemia	Failure	1	Failure	1	Success	0	0	0	1	0	0	XI Diseases of the digestive system	500-1000mg
407	F	28	Metrorragias	XIV Diseases of the genitourinary system	10	32.3	64	19	1.3	3	#N/A	12.7	37.1	75.9	25.9	33.6	21	2.7	4.8	11.9	6.9	32.3	18	27	14.8607	18.5938	36.3158	2484.62	600	Yes	No	1	Yes	No	Iron Deficiency Anemia	Iron Deficiency Anemia	Success	0	Failure	1	Success	0	1	0	0	0	0	XIV Diseases of the genitourinary system	500-1000mg
408	F	39	Metrorragias	XIV Diseases of the genitourinary system	11.3	34	75	25	4	14	#N/A	12.4	37	80	26	180	45	1.1	3	5	1	176	31	9.73451	8.82353	6.66667	4	4400	221.429	Yes	No	1	Yes	No	Iron Deficiency Anemia	Iron Deficiency Anemia	Failure	1	Failure	1	Success	0	1	0	0	0	0	XIV Diseases of the genitourinary system	500-1000mg
409	F	44	Drepanocitose	III Diseases of the blood and blood-forming organs and certain disorders involving the immune mechanism	8.6	28	63	19	5	3	#N/A	13.6	42.6	77.3	24.6	181.4	35	5	14.6	14.3	5.6	176.4	32	58.1395	52.1429	22.6984	29.4737	3528	1066.67	Yes	No	1	Yes	No	Iron Deficiency Anemia	Iron Deficiency Anemia	Success	0	Success	0	Success	0	0	0	0	0	1	Others	>1000mg
410	F	35	Metrorragias	XIV Diseases of the genitourinary system	12.5	37	80	26	32	10	#N/A	13.1	39	83	27	166	45	0.6	2	3	1	134	35	4.8	5.40541	3.75	3.84615	418.75	350	No	No	0	Yes	No	Iron Deficiency without Anemia	Non-Iron Deficiency Anemia	Failure	1	Failure	1	Success	0	1	0	0	0	0	XIV Diseases of the genitourinary system	500-1000mg
411	M	32	Anemia hemolÃ­tica	III Diseases of the blood and blood-forming organs and certain disorders involving the immune mechanism	13.3	40	91	29	25	15	#N/A	13.7	41	88	28	33	15	0.4	1	-3	-1	8	0	3.00752	2.5	-3.2967	-3.44828	32	0	No	No	0	Yes	Yes	Iron Deficiency without Anemia	Non-Iron Deficiency Anemia	Failure	1	Failure	1	Failure	1	0	0	0	0	1	Others	500-1000mg
412	M	49	Metrorragias	XIV Diseases of the genitourinary system	11.3	34.1	87.8	29.1	4.5	10	#N/A	13.1	39	93.4	31.4	76.2	32	1.8	4.9	5.6	2.3	71.7	22	15.9292	14.3695	6.37813	7.90378	1593.33	220	Yes	No	1	Yes	No	Iron Deficiency Anemia	Iron Deficiency Anemia	Failure	1	Failure	1	Success	0	1	0	0	0	0	XIV Diseases of the genitourinary system	500-1000mg
413	M	49	DII	XI Diseases of the digestive system	12.3	36.7	88	29.4	310.5	7	#N/A	12.8	37.9	85.5	28.8	657.4	11	0.5	1.2	-2.5	-0.6	346.9	4	4.06504	3.26975	-2.84091	-2.04082	111.723	57.1429	Yes	Yes	1	Yes	Yes	Iron Deficiency Anemia	Iron Deficiency Anemia	Failure	1	Failure	1	Failure	1	0	0	1	0	0	XI Diseases of the digestive system	500-1000mg
414	F	38	Metrorragias	XIV Diseases of the genitourinary system	11.8	36	73	24	9.4	16	#N/A	14.5	42	87.7	30	76	34	2.7	6	14.7	6	66.6	18	22.8814	16.6667	20.137	25	708.511	112.5	Yes	No	1	Yes	No	Iron Deficiency Anemia	Iron Deficiency Anemia	Success	0	Failure	1	Success	0	1	0	0	0	0	XIV Diseases of the genitourinary system	500-1000mg
415	F	81	DII	XI Diseases of the digestive system	11.9	36	96	31	128	12	#N/A	12.4	37.8	96.2	31.6	233.2	32	0.5	1.8	0.2	0.6	105.2	20	4.20168	5	0.208333	1.93548	82.1875	166.667	Yes	No	1	Yes	No	Iron Deficiency Anemia	Iron Deficiency Anemia	Failure	1	Failure	1	Success	0	0	0	1	0	0	XI Diseases of the digestive system	500mg
417	F	67	Insuf card	IX Diseases of the circulatory system	14.2	41	93	31	29.4	12	#N/A	15.4	48.4	91.8	30.4	169.1	24	1.2	7.4	-1.2	-0.6	139.7	12	8.4507	18.0488	-1.29032	-1.93548	475.17	100	No	No	0	Yes	No	Iron Deficiency without Anemia	Non-Iron Deficiency Anemia	Failure	1	Failure	1	Success	0	0	0	0	1	0	IX Diseases of the circulatory system	500mg
418	F	25	Metrorragias	XIV Diseases of the genitourinary system	12.2	41.7	74.4	21.7	13.8	10	#N/A	13.5	43	75	23	212	58	1.3	1.3	0.6	1.3	198.2	48	10.6557	3.11751	0.806452	5.99078	1436.23	480	No	No	0	Yes	No	Iron Deficiency without Anemia	Non-Iron Deficiency Anemia	Failure	1	Failure	1	Success	0	1	0	0	0	0	XIV Diseases of the genitourinary system	500-1000mg
419	M	33	DII	XI Diseases of the digestive system	11.8	34	93	31	262	17	#N/A	13	38	91	31	378	28	1.2	4	-2	0	116	11	10.1695	11.7647	-2.15054	0	44.2748	64.7059	Yes	Yes	1	Yes	No	Iron Deficiency Anemia	Iron Deficiency Anemia	Failure	1	Failure	1	Success	0	0	0	1	0	0	XI Diseases of the digestive system	500mg
420	M	41	Coagulopatia	III Diseases of the blood and blood-forming organs and certain disorders involving the immune mechanism	11.2	33.2	76.8	25.9	8.5	5	#N/A	12.9	38	81.3	27.7	86.3	31	1.7	4.8	4.5	1.8	77.8	26	15.1786	14.4578	5.85938	6.94981	915.294	520	Yes	Yes	1	Yes	No	Iron Deficiency Anemia	Iron Deficiency Anemia	Failure	1	Failure	1	Success	0	0	0	0	0	1	Others	500-1000mg
421	F	35	DII	XI Diseases of the digestive system	13.4	41	86	28	30	12	#N/A	14	41	88.3	30.2	102.7	20	0.6	0	2.3	2.2	72.7	8	4.47761	0	2.67442	7.85714	242.333	66.6667	No	No	0	Yes	No	Iron Deficiency without Anemia	Non-Iron Deficiency Anemia	Failure	1	Failure	1	Failure	1	0	0	1	0	0	XI Diseases of the digestive system	500-1000mg
422	F	69	Neo recto	II Neoplasms	12	36.1	89.5	29.8	7.7	15	#N/A	13.6	40.7	93.9	31.3	149	27	1.6	4.6	4.4	1.5	141.3	12	13.3333	12.7424	4.9162	5.03356	1835.06	80	Yes	No	1	Yes	No	Iron Deficiency Anemia	Iron Deficiency Anemia	Failure	1	Failure	1	Success	0	0	1	0	0	0	II Neoplasms	500-1000mg
423	M	78	Anemia/ferr	III Diseases of the blood and blood-forming organs and certain disorders involving the immune mechanism	8.8	27	89	28	363	6	#N/A	9.7	31	89	27	765	14	0.9	4	0	-1	402	8	10.2273	14.8148	0	-3.57143	110.744	133.333	Yes	Yes	1	Yes	Yes	Iron Deficiency Anemia	Iron Deficiency Anemia	Failure	1	Failure	1	Failure	1	0	0	0	0	1	Others	500-1000mg
424	M	80	Neo hematolÃ³gica	II Neoplasms	9.7	33	81	24	175	16	#N/A	11.3	33	82	27	207	19	1.6	0	1	3	32	3	16.4948	0	1.23457	12.5	18.2857	18.75	Yes	Yes	1	Yes	Yes	Iron Deficiency Anemia	Iron Deficiency Anemia	Failure	1	Failure	1	Failure	1	0	1	0	0	0	II Neoplasms	500-1000mg
425	F	72	Neo hematolÃ³gica	II Neoplasms	11.3	34.3	87	29	270	8	#N/A	12.7	40.2	91.8	28.9	692.8	13	1.4	5.9	4.8	-0.1	422.8	5	12.3894	17.2012	5.51724	-0.344828	156.593	62.5	Yes	No	1	Yes	Yes	Iron Deficiency Anemia	Iron Deficiency Anemia	Failure	1	Failure	1	Failure	1	0	1	0	0	0	II Neoplasms	500-1000mg
426	F	43	Gravidez	XV Pregnancy, childbirth and the puerperium	9.2	28	78	25	9.1	4	#N/A	9.9	28	84	27	591	23	0.7	0	6	2	581.9	19	7.6087	0	7.69231	8	6394.51	475	Yes	Yes	1	Yes	No	Iron Deficiency Anemia	Iron Deficiency Anemia	Failure	1	Failure	1	Success	0	0	0	0	0	1	Others	500-1000mg
427	F	79	Angiodisplasia	XI Diseases of the digestive system	13.6	42.2	87.1	28	84.4	14	#N/A	13.5	41	87	28	572	16	-0.1	-1.2	-0.1	0	487.6	2	-0.735294	-2.8436	-0.114811	0	577.725	14.2857	No	No	0	Yes	Yes	Iron Deficiency without Anemia	Non-Iron Deficiency Anemia	Failure	1	Failure	1	Failure	1	0	0	1	0	0	XI Diseases of the digestive system	500-1000mg
428	F	73	DHC	XI Diseases of the digestive system	9.8	31.3	96	30.1	17.6	9	#N/A	10.4	33.8	99	30	134	14	0.6	2.5	3	-0.1	116.4	5	6.12245	7.98722	3.125	-0.332226	661.364	55.5556	Yes	Yes	1	Yes	Yes	Iron Deficiency Anemia	Iron Deficiency Anemia	Failure	1	Failure	1	Failure	1	0	0	1	0	0	XI Diseases of the digestive system	500-1000mg
429	M	70	DHC	XI Diseases of the digestive system	10	30	86	27.1	11.2	10	#N/A	11.5	35	91	29	294	37	1.5	5	5	1.9	282.8	27	15	16.6667	5.81395	7.01107	2525	270	Yes	Yes	1	Yes	No	Iron Deficiency Anemia	Iron Deficiency Anemia	Failure	1	Failure	1	Success	0	0	0	1	0	0	XI Diseases of the digestive system	500-1000mg
430	F	57	DHC	XI Diseases of the digestive system	11.5	35.3	89.1	29	12.1	14	#N/A	10.9	33.9	90.7	29.1	11.9	12	-0.6	-1.4	1.6	0.1	-0.2	-2	-5.21739	-3.96601	1.79574	0.344828	-1.65289	-14.2857	Yes	Yes	1	Yes	Yes	Iron Deficiency Anemia	Iron Deficiency Anemia	Failure	1	Failure	1	Failure	1	0	0	1	0	0	XI Diseases of the digestive system	500-1000mg
431	F	42	Metrorragias	XIV Diseases of the genitourinary system	11.1	33.5	78.9	26.1	1.8	5	#N/A	12.2	37.8	86	28	147.4	32	1.1	4.3	7.1	1.9	145.6	27	9.90991	12.8358	8.99873	7.27969	8088.89	540	Yes	No	1	Yes	No	Iron Deficiency Anemia	Iron Deficiency Anemia	Failure	1	Failure	1	Success	0	1	0	0	0	0	XIV Diseases of the genitourinary system	500-1000mg
432	M	73	D celÃ­aca	XI Diseases of the digestive system	11	34.5	92.2	29.3	7.7	7	#N/A	11.2	34.3	95.7	31.2	122.4	21	0.2	-0.2	3.5	1.9	114.7	14	1.81818	-0.57971	3.7961	6.48464	1489.61	200	Yes	Yes	1	Yes	No	Iron Deficiency Anemia	Iron Deficiency Anemia	Failure	1	Failure	1	Success	0	0	0	1	0	0	XI Diseases of the digestive system	500-1000mg
433	M	38	DII	XI Diseases of the digestive system	11.4	37.9	86	26	126.5	3	#N/A	12.8	40.9	90.7	28.3	234.5	13	1.4	3	4.7	2.3	108	10	12.2807	7.91557	5.46512	8.84615	85.3755	333.333	Yes	Yes	1	Yes	Yes	Iron Deficiency Anemia	Iron Deficiency Anemia	Failure	1	Failure	1	Failure	1	0	0	1	0	0	XI Diseases of the digestive system	500-1000mg
434	M	87	HÃ©rnia do hiato	XI Diseases of the digestive system	9.3	31	69	20	18.9	9	#N/A	11.8	35	80	26	414	23	2.5	4	11	6	395.1	14	26.8817	12.9032	15.942	30	2090.48	155.556	Yes	Yes	1	Yes	No	Iron Deficiency Anemia	Iron Deficiency Anemia	Success	0	Failure	1	Success	0	0	0	1	0	0	XI Diseases of the digestive system	500-1000mg
435	F	46	Metrorragias	XIV Diseases of the genitourinary system	8.9	29.1	64.7	19.7	3.1	4	#N/A	10.8	35	74	22	115	23	1.9	5.9	9.3	2.3	111.9	19	21.3483	20.2749	14.374	11.6751	3609.68	475	Yes	Yes	1	Yes	No	Iron Deficiency Anemia	Iron Deficiency Anemia	Failure	1	Failure	1	Success	0	1	0	0	0	0	XIV Diseases of the genitourinary system	500-1000mg
436	F	84	IRC	XIV Diseases of the genitourinary system	10.2	32	94	29	138	11	#N/A	10.8	33.3	92.7	30	707	20	0.6	1.3	-1.3	1	569	9	5.88235	4.0625	-1.38298	3.44828	412.319	81.8182	Yes	Yes	1	Yes	No	Iron Deficiency Anemia	Iron Deficiency Anemia	Failure	1	Failure	1	Failure	1	1	0	0	0	0	XIV Diseases of the genitourinary system	500-1000mg
437	M	80	Gastrite/Ulcera	XI Diseases of the digestive system	9.2	27.7	86.4	28.7	36.8	13	#N/A	10.9	32.5	90.6	30.4	219.7	30	1.7	4.8	4.2	1.7	182.9	17	18.4783	17.3285	4.86111	5.92334	497.011	130.769	Yes	Yes	1	Yes	No	Iron Deficiency Anemia	Iron Deficiency Anemia	Failure	1	Failure	1	Success	0	0	0	1	0	0	XI Diseases of the digestive system	>1000mg
438	M	67	Neo colon	II Neoplasms	12.8	37.1	82.6	28.7	60	10	#N/A	13.5	40.3	81	27	472	31	0.7	3.2	-1.6	-1.7	412	21	5.46875	8.62534	-1.93705	-5.92334	686.667	210	Yes	No	1	Yes	No	Iron Deficiency Anemia	Iron Deficiency Anemia	Failure	1	Failure	1	Success	0	0	1	0	0	0	II Neoplasms	500-1000mg
439	M	47	DII	XI Diseases of the digestive system	13.4	39	95	32	34.5	16	#N/A	14.1	40	93	32	23.6	14	0.7	1	-2	0	-10.9	-2	5.22388	2.5641	-2.10526	0	-31.5942	-12.5	No	No	0	Yes	Yes	Iron Deficiency without Anemia	Non-Iron Deficiency Anemia	Failure	1	Failure	1	Failure	1	0	0	1	0	0	XI Diseases of the digestive system	500-1000mg
440	F	36	Metrorragias	XIV Diseases of the genitourinary system	9	30	72	21	11	3	#N/A	12	38	83	25	301	13	3	8	11	4	290	10	33.3333	26.6667	15.2778	19.0476	2636.36	333.333	Yes	Yes	1	Yes	Yes	Iron Deficiency Anemia	Iron Deficiency Anemia	Success	0	Failure	1	Failure	1	1	0	0	0	0	XIV Diseases of the genitourinary system	500-1000mg
441	F	86	Insuf card	IX Diseases of the circulatory system	12.3	38.3	81	26	387	6	#N/A	12.9	40	78.5	25.4	552.3	12	0.6	1.7	-2.5	-0.6	165.3	6	4.87805	4.43864	-3.08642	-2.30769	42.7132	100	No	No	0	Yes	Yes	Iron Deficiency without Anemia	Non-Iron Deficiency Anemia	Failure	1	Failure	1	Failure	1	0	0	0	1	0	IX Diseases of the circulatory system	500-1000mg
442	F	78	Angiodisplasia	XI Diseases of the digestive system	11.5	36.5	85.8	27.4	9.7	9	#N/A	13.8	42.2	90.5	29.6	141	41	2.3	5.7	4.7	2.2	131.3	32	20	15.6164	5.47786	8.0292	1353.61	355.556	Yes	No	1	Yes	No	Iron Deficiency Anemia	Iron Deficiency Anemia	Success	0	Failure	1	Success	0	0	0	1	0	0	XI Diseases of the digestive system	500-1000mg
443	F	72	Hemorragia digestiva baixa	XI Diseases of the digestive system	9.7	30	90	29	20	9	#N/A	11.1	34	91	29	237	24	1.4	4	1	0	217	15	14.433	13.3333	1.11111	0	1085	166.667	Yes	Yes	1	Yes	No	Iron Deficiency Anemia	Iron Deficiency Anemia	Failure	1	Failure	1	Success	0	0	0	1	0	0	XI Diseases of the digestive system	500-1000mg
444	F	45	Metrorragias	XIV Diseases of the genitourinary system	9.2	29.3	74	23.2	2.1	6	#N/A	13	39.7	85.2	27.9	122.7	32	3.8	10.4	11.2	4.7	120.6	26	41.3043	35.4949	15.1351	20.2586	5742.86	433.333	Yes	No	1	Yes	No	Iron Deficiency Anemia	Iron Deficiency Anemia	Success	0	Success	0	Success	0	1	0	0	0	0	XIV Diseases of the genitourinary system	500-1000mg
445	F	42	Neo mama	II Neoplasms	9.6	29.7	78.3	25.4	732.5	17	#N/A	11.2	31.8	77.3	27.2	1704	30	1.6	2.1	-1	1.8	971.5	13	16.6667	7.07071	-1.27714	7.08661	132.628	76.4706	Yes	Yes	1	Yes	No	Iron Deficiency Anemia	Iron Deficiency Anemia	Failure	1	Failure	1	Success	0	0	1	0	0	0	II Neoplasms	500-1000mg
446	F	60	Neo gÃ¡strico	II Neoplasms	10.4	33	88	25	98	5	#N/A	12.2	39.7	90.2	27.8	500	12	1.8	6.7	2.2	2.8	402	7	17.3077	20.303	2.5	11.2	410.204	140	Yes	No	1	Yes	Yes	Iron Deficiency Anemia	Iron Deficiency Anemia	Failure	1	Failure	1	Failure	1	0	1	0	0	0	II Neoplasms	500-1000mg
447	F	79	Neo colon	II Neoplasms	8.9	30.9	78.8	22.6	4.7	6	#N/A	11.1	37	85	25	407	21	2.2	6.1	6.2	2.4	402.3	15	24.7191	19.7411	7.86802	10.6195	8559.57	250	Yes	Yes	1	Yes	No	Iron Deficiency Anemia	Iron Deficiency Anemia	Success	0	Failure	1	Success	0	0	1	0	0	0	II Neoplasms	500-1000mg
448	F	78	Insuf card	IX Diseases of the circulatory system	10.8	32	80	26	48	10	#N/A	11.2	34.4	89.9	27.7	240	21	0.4	2.4	9.9	1.7	192	11	3.7037	7.5	12.375	6.53846	400	110	Yes	Yes	1	Yes	No	Iron Deficiency Anemia	Iron Deficiency Anemia	Failure	1	Failure	1	Success	0	0	0	0	1	0	IX Diseases of the circulatory system	500-1000mg
449	F	47	CBP	XI Diseases of the digestive system	8.6	28.5	79.1	23.8	5.7	3	#N/A	11.5	37.2	92.2	28.4	132.1	40	2.9	8.7	13.1	4.6	126.4	37	33.7209	30.5263	16.5613	19.3277	2217.54	1233.33	Yes	Yes	1	Yes	No	Iron Deficiency Anemia	Iron Deficiency Anemia	Success	0	Failure	1	Success	0	0	0	1	0	0	XI Diseases of the digestive system	500-1000mg
450	F	76	Angiodisplasia	XI Diseases of the digestive system	11.8	36	89	29	24	14	#N/A	13.4	38	86	30	364	43	1.6	2	-3	1	340	29	13.5593	5.55556	-3.37079	3.44828	1416.67	207.143	Yes	No	1	Yes	No	Iron Deficiency Anemia	Iron Deficiency Anemia	Failure	1	Failure	1	Success	0	0	0	1	0	0	XI Diseases of the digestive system	500-1000mg
451	F	62	Neo colon	II Neoplasms	9.6	30	79	24	5	5	#N/A	11	33	84	27	318	22	1.4	3	5	3	313	17	14.5833	10	6.32911	12.5	6260	340	Yes	Yes	1	Yes	No	Iron Deficiency Anemia	Iron Deficiency Anemia	Failure	1	Failure	1	Success	0	0	1	0	0	0	II Neoplasms	500-1000mg
452	F	69	HÃ©rnia do hiato	XI Diseases of the digestive system	14	42.8	77.6	25.4	548	11	#N/A	14.2	42.7	80.1	26.7	923.4	36	0.2	-0.1	2.5	1.3	375.4	25	1.42857	-0.233645	3.22165	5.11811	68.5036	227.273	No	No	0	Yes	No	Iron Deficiency without Anemia	Non-Iron Deficiency Anemia	Failure	1	Failure	1	Success	0	0	0	1	0	0	XI Diseases of the digestive system	500-1000mg
453	F	76	Anemia/ferr	III Diseases of the blood and blood-forming organs and certain disorders involving the immune mechanism	13.4	41	86	27	51	14	#N/A	14	43	91	29	199	16	0.6	2	5	2	148	2	4.47761	4.87805	5.81395	7.40741	290.196	14.2857	No	No	0	Yes	Yes	Iron Deficiency without Anemia	Non-Iron Deficiency Anemia	Failure	1	Failure	1	Failure	1	0	0	0	0	1	Others	500mg
454	F	80	Angiodisplasia	XI Diseases of the digestive system	10	33.2	80	24.1	6.5	5	#N/A	12.8	37.6	86.9	29.6	92.4	22	2.8	4.4	6.9	5.5	85.9	17	28	13.253	8.625	22.8216	1321.54	340	Yes	No	1	Yes	No	Iron Deficiency Anemia	Iron Deficiency Anemia	Success	0	Failure	1	Success	0	0	0	1	0	0	XI Diseases of the digestive system	500-1000mg
455	F	32	Metrorragias	XIV Diseases of the genitourinary system	8	29	58	15	2.8	3	#N/A	10.6	36	64	18	229	29	2.6	7	6	3	226.2	26	32.5	24.1379	10.3448	20	8078.57	866.667	Yes	Yes	1	Yes	No	Iron Deficiency Anemia	Iron Deficiency Anemia	Success	0	Failure	1	Success	0	1	0	0	0	0	XIV Diseases of the genitourinary system	500-1000mg
456	F	38	Metrorragias	XIV Diseases of the genitourinary system	11.7	38.3	96.2	29.5	39	9	#N/A	14	44	94	29	97	30	2.3	5.7	-2.2	-0.5	58	21	19.6581	14.8825	-2.2869	-1.69492	148.718	233.333	Yes	No	1	Yes	No	Iron Deficiency Anemia	Iron Deficiency Anemia	Success	0	Failure	1	Success	0	1	0	0	0	0	XIV Diseases of the genitourinary system	500-1000mg
457	F	74	HÃ©rnia do hiato	XI Diseases of the digestive system	8.9	28	71	21	7	3	#N/A	11.4	36.7	80.2	25	163	26	2.5	8.7	9.2	4	156	23	28.0899	31.0714	12.9577	19.0476	2228.57	766.667	Yes	Yes	1	Yes	No	Iron Deficiency Anemia	Iron Deficiency Anemia	Success	0	Failure	1	Success	0	0	0	1	0	0	XI Diseases of the digestive system	500-1000mg
458	M	66	Insuf card	IX Diseases of the circulatory system	12.4	35	85	30	126	18	#N/A	13	36	84	29	161	26	0.6	1	-1	-1	35	8	4.83871	2.85714	-1.17647	-3.33333	27.7778	44.4444	Yes	Yes	1	Yes	No	Iron Deficiency Anemia	Iron Deficiency Anemia	Failure	1	Failure	1	Success	0	0	0	0	1	0	IX Diseases of the circulatory system	500mg
459	M	84	Neo colon	II Neoplasms	10.7	33.3	89.7	28.7	13.1	14	#N/A	11.5	37.5	88.7	27.9	66	15	0.8	4.2	-1	-0.8	52.9	1	7.47664	12.6126	-1.11483	-2.78746	403.817	7.14286	Yes	Yes	1	Yes	Yes	Iron Deficiency Anemia	Iron Deficiency Anemia	Failure	1	Failure	1	Failure	1	0	1	0	0	0	II Neoplasms	500-1000mg
460	F	82	Neo mama	II Neoplasms	11.5	35.2	94	31	168.5	16	#N/A	11.6	36.6	94.2	29.8	417	19	0.1	1.4	0.2	-1.2	248.5	3	0.869565	3.97727	0.212766	-3.87097	147.478	18.75	Yes	Yes	1	Yes	Yes	Iron Deficiency Anemia	Iron Deficiency Anemia	Failure	1	Failure	1	Failure	1	0	1	0	0	0	II Neoplasms	500-1000mg
[truncated: 1 more columns]

## Sheet: Codebook
ID	Patient ID
sex	Gender
age	Age
diag1unif	Main diagnostic
ICD10	ICD10 code of diagnostic
hb1	Hemoglobin pre treatment
ht1	Hematocrit pre treatment
vgm1	MCV pre treatment
hgm1	MCH pre treatment
fer1	Ferriting pre treatment
tstat1	Transferrin Saturation pre treatment
dose	Administered Dose group
adverse	Adverse Events
hb2	Hemoglobin post treatment
ht2	Hematocrit post treatment
vgm2	MCV post treatment
hgm2	MCH post treatment
fer2	Ferriting post treatment
tstat2	Transferrin Saturation post treatment
hbdif	Hemoglobin absolute diferente between pre and post treatment values
htdif	Hemoglobin absolute diferente between pre and post treatment values
vgmdif	MCV absolute diferente between pre and post treatment values
hgmdif	MCH absolute diferente between pre and post treatment values
ferdif	Ferriting absolute diferente between pre and post treatment values
tsatdif	Transferrin Saturation absolute diferente between pre and post treatment values
hbdifpct	Hemoglobin relative diferente between pre and post treatment values
htdifpct	Hemoglobin relative diferente between pre and post treatment values
vgmdifpct	MCV relative diferente between pre and post treatment values
hgmdifpct	MCH relative diferente between pre and post treatment values
ferdifpct	Ferriting relative diferente between pre and post treatment values
tsatdifpct	Transferrin Saturation relative diferente between pre and post treatment values
Anemia1	Anemia pre treatment
Anemia2	Anemia post treatment
Anemia1num	Anemia pre treatment numeric
IronDef1	Iron Deficiency pre treatment
IronDef2	Iron Deficiency post treatment
AnemiaIron	Iron Deficiency Anemia
AnemiaIron_dico	Dicothomized variable with patients with Iron Deficiency Anemia
Endpoint2g	Endpoint 2 g/dL increase in hemoglobin
Endpoint2gnum	Endpoint 2 g/dL increase in hemoglobin numeric
Endpoint3g	Endpoint 3 g/dL increase in hemoglobin
Endpoint3gnum	Endpoint 3 g/dL increase in hemoglobin numeric
Endpointtsat	Endpoint TSAT>20%
Endpointtsatnum	Endpoint TSAT>20% numeric
Genitouri	Genitourinary ICD10 group
Neoplasm	Neoplasm ICD10 group
Digestive	Digestive Disease ICD10 group
Circulatory	Circulatory ICD10 group
Others	Others ICD10 group
ICD10Final	ICD10 final coding
AgeGroup	Age group (>65 years)
