# Supplementary material for: Corrigendum to “Efficacy and Tolerability of Intravenous Ferric Carboxymaltose in Patients with Iron Deficiency at a Hospital Outpatient Clinic: A Retrospective Cohort Study of Real-World Clinical Practice”
Source: Anemia. 2019 Jan 1;2019:9242607. doi: 10.1155/2019/9242607 (PMC6332971; doi:10.1155/2019/9242607)
Supplement: Supplementary Materials — The underlying patient-level data and a script with all the logistic regression models adjusted to generate the Odds Ratio and respective confidence intervals for Table 3 are included as Supplementary Materials. [file 9242607.f1.zip › 9242607.f1/Script for Statistical Analysis-1.txt]

##################################################
##Code used to adjust Logistic Regression models #
##for each endpoint. 95% Confidence Intervals    #
##were obtained using confint() function from    #
##base R.					 #
##################################################


###data is an R data.frame with the study database
###data2 is an R data.frame with the study database including only subjects with Iron Deficiency (N=450)

######################################
# Endpoint Hemoglobin increase 2g/dL #
######################################

#Gender
glm(Endpoint2gnum~sex+age+hb1,family=binomial,data=data)

#Anemia (Iron Deficiency Anemia) - Only fitted for age since Hemoglobin was used to categorize Anemia
glm(Endpoint2gnum~AnemiaIron_dico+age,family=binomial,data=data)

#Digestive System 
glm(Endpoint2gnum~Digestive+age+hb1,family=binomial,data=data)

#Genitourinary System
glm(Endpoint2gnum~Genitouri+age+hb1,family=binomial,data=data)

#Neoplasm
glm(Endpoint2gnum~Neoplasm+age+hb1,family=binomial,data=data)

#Circulatory System
glm(Endpoint2gnum~Circulatory+age+hb1,family=binomial,data=data)

#Other diseases
glm(Endpoint2gnum~Others+age+hb1,family=binomial,data=data)

#Dose Group
glm(Endpoint2gnum~DoseGroup+age+hb1,family=binomial,data=data)

######################################
# Endpoint Hemoglobin increase 3g/dL #
######################################

#Gender
glm(Endpoint3gnum~sex+age+hb1,family=binomial,data=data)

#Anemia (Iron Deficiency Anemia) - Only fitted for age since Hemoglobin was used to categorize Anemia
glm(Endpoint3gnum~AnemiaIron_dico+age,family=binomial,data=data)

#Digestive System 
glm(Endpoint3gnum~Digestive+age+hb1,family=binomial,data=data)

#Genitourinary System
glm(Endpoint3gnum~Genitouri+age+hb1,family=binomial,data=data)

#Neoplasm
glm(Endpoint3gnum~Neoplasm+age+hb1,family=binomial,data=data)

#Circulatory System
glm(Endpoint3gnum~Circulatory+age+hb1,family=binomial,data=data)

#Other diseases
glm(Endpoint3gnum~Others+age+hb1,family=binomial,data=data)

#Dose Group
glm(Endpoint3gnum~DoseGroup+age+hb1,family=binomial,data=data)

#######################################
# Endpoint Transferrin Saturation>20% #
#######################################

#Gender
glm(Endpointtsatnum~sex+age+fer1,family=binomial,data=data)

#Anemia (Iron Deficiency Anemia
glm(Endpointtsatnum~AnemiaIron_dico+age+fer1,family=binomial,data=data)

#Digestive System 
glm(Endpointtsatnum~Digestive+age+fer1,family=binomial,data=data)

#Genitourinary System
glm(Endpointtsatnum~Genitouri+age+fer1,family=binomial,data=data)

#Neoplasm
glm(Endpointtsatnum~Neoplasm+age+fer1,family=binomial,data=data)

#Circulatory System
glm(Endpointtsatnum~Circulatory+age+fer1,family=binomial,data=data)

#Other diseases
glm(Endpointtsatnum~Others+age+fer1,family=binomial,data=data)

#Dose Group
glm(Endpointtsatnum~DoseGroup+age+fer1,family=binomial,data=data)
